# Supplementary material for: Haplotype of the astrocytic water channel AQP4 is associated with slow wave energy regulation in human NREM sleep
Source: PLoS Biol. 2020 May 5;18(5):e3000623. doi: 10.1371/journal.pbio.3000623 (PMC7199924; doi:10.1371/journal.pbio.3000623)
Supplement: S2 Data — NREM, non–rapid eye movement. (XLS) [file pbio.3000623.s007.xls]

## Sheet: NREM EEG data_whole night
Subject ID	AQP4 haplotypes	Age_group	Night (baseline/recovery)	derivation	NREM_min	bin01	bin02	bin03	bin04	bin05	bin06	bin07	bin08	bin09	bin10	bin11	bin12	bin13	bin14	bin15	bin16	bin17	bin18	bin19	bin20	bin21	bin22	bin23	bin24	bin25	bin26	bin27	bin28	bin29	bin30	bin31	bin32	bin33	bin34	bin35	bin36	bin37	bin38	bin39	bin40	bin41	bin42	bin43	bin44
2	HtMa / HtMa	young	b	C3A2	330.333	28.521	63.0836	76.2635	80.0468	58.431	41.3444	27.6385	19.1877	14.4163	11.2566	9.0408	7.2701	6.1867	5.104	4.2171	3.5771	2.9896	2.551	2.2366	1.9645	1.7962	1.6593	1.5268	1.4056	1.3297	1.2642	1.2698	1.2272	1.1365	1.0838	1.0437	0.9669	0.8766	0.8039	0.7249	0.6794	0.6497	0.6206	0.577	0.5529	0.5403	0.5272	0.534	0.5341
2	HtMa / HtMa	young	r	C3A2	363	23.6981	61.7326	83.327	99.5568	88.4975	62.3263	40.721	27.3457	19.2552	14.6472	11.8519	9.7334	8.0265	6.3944	5.1854	4.3678	3.5961	3.0477	2.7107	2.4104	2.1552	2.0376	1.9333	1.8169	1.7184	1.704	1.679	1.6221	1.5078	1.4176	1.3148	1.2082	1.1154	1.0323	0.9623	0.8674	0.7783	0.7465	0.7189	0.6816	0.7002	0.7124	0.6785	0.6729
3	HtMa / HtMa	young	b	C3A2	283.333	74.5496	166.968	125.55	125.469	113.659	80.5135	53.8091	37.7396	29.1361	22.3602	17.2491	14.5323	12.3354	10.062	7.9722	6.5657	5.4561	4.5193	3.6015	3.0907	2.6929	2.3805	2.1449	1.9915	1.7961	1.6936	1.6192	1.53	1.4627	1.3769	1.2806	1.2016	1.187	1.1976	1.259	1.2491	1.2117	1.2229	1.2376	1.2451	1.231	1.1929	1.1886	1.1672
3	HtMa / HtMa	young	r	C3A2	304.667	81.3034	162.66	136.104	158.262	144.725	107.291	73.3455	50.396	37.1735	27.8881	22.5788	18.6355	15.4978	12.5801	10.407	8.1581	6.5755	5.3399	4.3478	3.7844	3.2436	2.8845	2.6202	2.3664	2.1726	1.9931	1.9098	1.834	1.7569	1.6631	1.5631	1.5078	1.4327	1.3768	1.3637	1.316	1.3124	1.3461	1.3318	1.2842	1.2661	1.2475	1.2298	1.2158
4	HtMa / HtMi	young	b	C3A2	324.333	47.9628	112.548	108.535	122.418	106.73	66.8046	38.1519	23.536	16.5841	12.5879	9.8743	8.2693	6.8849	5.8751	5.1911	4.4706	3.7687	3.2066	2.7858	2.557	2.3064	2.0883	2.0064	1.9114	1.7927	1.7155	1.6219	1.5536	1.4986	1.4284	1.3619	1.2809	1.2478	1.1721	1.0972	0.9981	0.9773	0.9236	0.8876	0.8852	0.8617	0.8412	0.8682	0.9135
4	HtMa / HtMi	young	r	C3A2	333.667	188.702	281.779	185.544	189.484	194.125	135.492	72.7175	43.1681	28.6495	20.7658	16.3898	13.5594	10.8606	9.1925	7.6875	6.5404	5.3429	4.4576	4.0358	3.502	3.1286	2.8045	2.5719	2.3879	2.2672	2.1341	2.0454	1.9978	1.9197	1.81	1.7102	1.6315	1.5514	1.4802	1.3696	1.3003	1.1954	1.0999	1.0811	1.0986	1.1078	1.1139	1.1644	1.1882
6	HtMa / HtMa	young	b	C3A2	333	18.8404	48.5291	57.6205	59.0624	47.2677	31.714	20.5234	13.8402	10.1909	8.5194	7.4772	6.6722	5.6913	4.9017	4.3193	3.7053	3.2303	2.8704	2.6642	2.6037	2.4698	2.4311	2.4403	2.5386	2.5485	2.4645	2.393	2.4539	2.5067	2.428	2.3649	2.2664	2.2129	2.1345	1.9405	1.8018	1.679	1.542	1.3588	1.2322	1.1152	1.05	0.982	0.9449
6	HtMa / HtMa	young	r	C3A2	362	21.4793	58.891	73.952	80.4333	64.9494	44.6083	30.3659	20.5943	15.3909	12.4937	10.166	8.4866	7.6278	6.6628	5.7017	4.9451	4.2471	3.6901	3.4861	3.2569	3.1287	3.0733	3.0193	3.1337	3.3036	3.4164	3.5546	3.7709	4.1681	4.1763	3.8255	3.4313	2.909	2.414	2.0782	1.8582	1.5918	1.3193	1.167	1.0506	0.9526	0.8831	0.8488	0.8583
7	HtMa / HtMa	young	b	C3A2	311	24.8553	65.4346	78.8629	98.8317	88.9603	56.6016	32.3393	21.3774	16.7291	13.4286	11.073	9.9525	8.4823	7.1759	6.3725	5.5559	4.674	3.9341	3.262	2.7869	2.4455	2.2556	2.0202	1.8309	1.6268	1.467	1.3459	1.2609	1.183	1.1381	1.0946	1.0306	1.0252	0.9886	0.9334	0.8874	0.8628	0.8332	0.7981	0.7861	0.7501	0.7404	0.7604	0.7626
7	HtMa / HtMa	young	r	C3A2	334.667	37.3001	90.197	102.226	137.369	127.765	89.4813	58.8721	37.0931	27.1793	21.9369	17.5963	14.798	12.0382	9.506	7.821	6.3076	5.1896	4.2678	3.5508	3.1412	2.7956	2.4918	2.2611	2.0365	1.773	1.6402	1.4902	1.4114	1.2826	1.1733	1.1124	1.0506	0.9923	0.9849	0.9194	0.848	0.7958	0.7346	0.6996	0.6739	0.6747	0.6613	0.6541	0.6704
8	HtMa / HtMa	young	b	C3A2	266.333	24.5358	60.5713	69.075	84.1284	72.7819	44.1197	26.8523	21.0554	16.0297	12.1986	9.9351	8.6075	7.2298	6.0674	5.2722	4.562	3.8232	3.3536	2.9656	2.5543	2.2792	2.0796	1.8881	1.7179	1.5873	1.4659	1.3545	1.2542	1.1561	1.0514	0.9288	0.8179	0.7278	0.6762	0.6123	0.5406	0.5067	0.4774	0.4467	0.4128	0.4065	0.3949	0.3805	0.3648
8	HtMa / HtMa	young	r	C3A2	311.667	65.5395	114.639	81.0183	82.4143	82.3952	60.0531	34.8251	24.738	19.67	16.1055	12.643	10.4291	8.688	7.3753	6.1333	5.1148	4.2004	3.5127	3.1379	2.7984	2.4887	2.2472	2.1068	1.9283	1.8127	1.6942	1.5437	1.4146	1.2866	1.2044	1.0405	0.8895	0.7854	0.7268	0.6313	0.5647	0.5422	0.4978	0.4459	0.4233	0.4152	0.3926	0.3892	0.3918
9	HtMa / HtMa	young	b	C3A2	338.333	45.8249	91.9124	69.1011	67.6286	53.3929	34.0381	21.4632	14.4026	10.3389	8.341	7.3942	6.3674	5.3173	4.6035	3.876	3.459	2.9944	2.5372	2.3023	2.1478	1.9753	1.9211	1.945	1.9908	1.9807	1.8725	1.723	1.6665	1.5465	1.4345	1.345	1.2988	1.2381	1.1544	1.0795	1.015	0.9235	0.7891	0.7095	0.6688	0.6138	0.5671	0.5078	0.4592
9	HtMa / HtMa	young	r	C3A2	345.667	72.4282	141.444	93.937	88.5016	77.7543	49.5126	31.8932	21.8884	15.7389	12.1743	9.8911	8.4193	7.228	6.0879	5.1517	4.3551	3.6547	3.1685	2.8607	2.5708	2.3073	2.1425	1.9949	1.97	1.9368	1.9124	1.9287	1.7923	1.6962	1.5447	1.4198	1.3194	1.2264	1.1619	1.0872	0.9637	0.8598	0.7865	0.711	0.6605	0.6202	0.6036	0.5931	0.5338
10	HtMa / HtMi	young	b	C3A2	327	38.7427	98.8414	117.135	140.844	119.231	79.421	46.1696	29.1858	19.9716	15.1986	12.0399	9.8649	8.617	7.1045	5.7717	5.0856	4.3584	3.7372	3.2822	2.9828	2.6422	2.3749	2.1727	1.9627	1.864	1.82	1.7366	1.7038	1.6713	1.6749	1.7955	1.9373	1.9638	1.925	1.8544	1.6801	1.5399	1.4268	1.2816	1.1853	1.1011	1.0861	1.0567	1.0602
10	HtMa / HtMi	young	r	C3A2	347	44.0701	104.892	111.06	145.137	142.512	99.2982	54.8088	33.1243	23.9353	17.8269	13.7639	11.5587	9.5748	8.0106	6.8605	5.7369	4.8686	4.1785	3.4326	3.0303	2.7059	2.5373	2.2524	2.0454	1.8901	1.804	1.7371	1.6802	1.6664	1.6884	1.7217	1.8331	1.935	1.9827	1.9155	1.7855	1.6103	1.3998	1.2955	1.2378	1.1261	1.0631	1.0426	1.0437
11	HtMa / HtMa	young	b	C3A2	301.333	42.876	93.2591	85.9763	84.3319	59.5686	35.6063	23.3999	17.0917	13.634	10.8179	9.016	7.7434	6.5525	5.3647	4.5835	3.861	3.202	2.7822	2.4685	2.2315	2.1039	1.976	1.8542	1.8896	1.7903	1.7397	1.6713	1.622	1.5123	1.3724	1.2118	1.0658	0.9606	0.8558	0.771	0.7235	0.661	0.597	0.5539	0.5159	0.4725	0.4538	0.436	0.3992
11	HtMa / HtMa	young	r	C3A2	351.667	67.7474	116.369	103.812	110.359	89.7089	55.9047	34.8624	26.2136	21.0286	16.9854	13.9932	11.6709	9.8849	8.0379	6.7827	5.4279	4.4174	3.7261	3.2994	2.9367	2.6043	2.4399	2.3187	2.2317	2.23	2.2018	2.1823	2.1274	1.9743	1.7744	1.5393	1.3451	1.1276	0.99	0.9159	0.8289	0.7419	0.6609	0.6277	0.5907	0.5585	0.557	0.5351	0.4897
12	HtMa / HtMa	young	b	C3A2	309.333	49.7332	105.57	93.1152	88.3062	64.6302	42.7632	28.5908	20.5254	15.5341	12.3978	10.1047	8.0588	6.8224	5.6914	4.6727	3.8514	3.2995	2.7981	2.4837	2.2219	2.0219	1.8292	1.7383	1.6303	1.562	1.5277	1.4757	1.4045	1.451	1.4887	1.5611	1.5854	1.6303	1.6725	1.6853	1.6502	1.5889	1.5161	1.4663	1.415	1.3387	1.3373	1.2709	1.1415
12	HtMa / HtMa	young	r	C3A2	365.333	42.9786	110.292	133.757	146.588	115.007	81.1126	53.212	34.63	24.4857	18.7498	14.7353	11.8298	9.6282	7.847	6.2393	4.9332	4.0251	3.5183	3.1262	2.8155	2.577	2.4254	2.3111	2.1876	2.1482	2.0754	2.0383	2.0933	2.1738	2.2606	2.407	2.6383	2.7332	2.7851	2.7007	2.5025	2.2752	2.0311	1.8225	1.6306	1.4214	1.2327	1.0943	0.9942
13	HtMa / HtMa	young	b	C3A2	308.333	56.3346	115.264	99.489	140.871	144.087	79.4269	40.8133	27.231	19.1853	14.1237	11.0917	9.0233	7.4737	6.2191	5.265	4.3962	3.7856	3.276	2.853	2.537	2.2197	1.9323	1.8044	1.7338	1.6584	1.5519	1.4212	1.3384	1.3027	1.2171	1.1442	1.1347	1.1145	1.0886	1.0387	0.9749	0.95	0.9179	0.8937	0.911	0.9359	0.946	0.9561	1.0087
13	HtMa / HtMa	young	r	C3A2	350.667	58.3301	122.016	119.641	182.806	204.62	124.888	58.8417	36.0023	25.8271	19.4031	15.0748	11.9118	9.8521	8.0286	6.5813	5.5292	4.8786	4.1887	3.6259	3.1881	2.8702	2.5563	2.3193	2.1566	1.9811	1.8719	1.8475	1.7796	1.6696	1.6405	1.6142	1.5057	1.3915	1.3258	1.309	1.2801	1.2552	1.2797	1.3138	1.3256	1.3722	1.3565	1.3379	1.3751
14	HtMa / HtMa	young	b	C3A2	313.667	26.9871	68.2808	70.2511	65.2499	49.8927	34.2232	22.8853	16.0454	12.54	10.0279	8.4058	7.1352	6.1053	5.2499	4.4482	3.8402	3.2193	2.9311	2.7393	2.4902	2.2584	2.1216	2.0018	1.899	1.8251	1.7759	1.7191	1.6802	1.6265	1.6693	1.6967	1.6221	1.5862	1.5573	1.4869	1.3249	1.1868	1.054	0.9392	0.8395	0.7729	0.7418	0.7218	0.7055
14	HtMa / HtMa	young	r	C3A2	353	24.356	73.1126	81.7679	85.2442	70.1177	47.1685	31.9249	23.0873	17.7137	14.2017	11.6728	9.9567	8.4096	6.8541	5.8337	4.875	4.2265	3.7093	3.2873	3.0925	2.8276	2.6486	2.4809	2.3433	2.2511	2.1804	2.1594	2.0297	1.9998	2.0077	2.0301	2.0028	1.9297	1.8764	1.8006	1.6345	1.5064	1.3842	1.2305	1.1321	1.0804	1.0156	0.9698	0.9284
15	HtMa / HtMi	young	b	C3A2	335.667	65.4318	148.211	135.889	131.127	97.3555	58.6232	35.3985	23.5778	17.2626	13.276	11.2224	10.0395	8.996	8.5325	7.9466	7.1654	6.2521	5.4015	4.7184	4.214	3.7429	3.3004	3.0343	2.8979	2.7896	2.6883	2.6303	2.5383	2.3501	2.2084	1.9988	1.7262	1.5044	1.2936	1.0964	0.9667	0.9107	0.8669	0.8184	0.7997	0.7242	0.6536	0.596	0.537
15	HtMa / HtMi	young	r	C3A2	345.667	44.2742	106.519	114.317	121.282	97.91	68.4937	44.5617	30.4298	22.417	17.9834	14.8075	12.3576	11.2205	10.4221	9.2234	7.863	6.5923	5.6853	4.9307	4.3403	3.916	3.4751	3.0871	2.9426	2.8853	2.6902	2.6305	2.5833	2.4439	2.2462	1.9949	1.7477	1.4792	1.2501	1.0989	0.9934	0.9322	0.8875	0.9491	1.0419	0.993	0.8276	0.6573	0.5496
16	HtMa / HtMi	young	b	C3A2	315.333	44.8445	99.3746	115.629	146.349	125.499	74.3317	43.8964	30.2811	21.1981	16.0602	12.719	11.0999	9.6793	8.1609	7.4521	6.534	5.5492	4.7235	3.9493	3.4389	3.0094	2.7422	2.5405	2.3338	2.2068	2.123	2.0676	2.0712	2.1002	2.2094	2.3034	2.3985	2.3491	2.3323	2.2918	2.2228	2.1595	2.0289	1.8221	1.6837	1.5976	1.4616	1.377	1.2345
16	HtMa / HtMi	young	r	C3A2	343	39.0799	99.8809	127.703	186.01	196.392	141.802	76.8768	45.4498	32.7587	24.943	20.0382	16.2507	13.4838	11.6866	10.0577	8.2095	6.8223	5.6692	4.7569	4.1706	3.8583	3.4704	3.2205	3.0132	2.7719	2.6654	2.6248	2.6634	2.759	2.9498	3.1512	3.282	3.3418	3.1801	2.9841	2.8214	2.5683	2.3385	2.11	1.8853	1.8112	1.7417	1.6407	1.4693
17	HtMa / HtMa	young	b	C3A2	332.667	21.0782	58.8835	83.4487	83.355	57.5424	37.1465	24.4168	15.817	11.689	9.7525	7.817	6.2545	5.0872	4.0821	3.3796	2.9059	2.5372	2.2175	1.9285	1.7441	1.6103	1.4728	1.3695	1.3273	1.2786	1.2283	1.0955	0.9809	0.8842	0.7617	0.6506	0.5683	0.4941	0.4448	0.4129	0.3885	0.3674	0.3394	0.3133	0.3035	0.2844	0.2604	0.2431	0.243
17	HtMa / HtMa	young	r	C3A2	357.333	28.6973	69.957	96.0656	98.0442	72.3682	53.0248	39.4942	26.458	18.4976	14.3764	11.706	9.4773	7.6091	5.8814	4.5872	3.739	3.24	2.7084	2.3394	2.1781	2.0188	1.8746	1.7272	1.6045	1.5284	1.4279	1.2333	1.0809	0.9442	0.8073	0.6951	0.6064	0.5233	0.4655	0.4188	0.3831	0.3616	0.3382	0.3111	0.2906	0.2682	0.2462	0.2314	0.2249
18	HtMa / HtMa	young	b	C3A2	285	93.9483	200.958	191.086	171.801	101.468	50.4013	28.6837	19.8204	14.6166	11.3854	9.0997	7.6976	6.5648	5.6267	4.8115	4.0757	3.3312	2.8337	2.4704	2.2229	2.0048	1.7449	1.6046	1.5299	1.499	1.418	1.4257	1.4094	1.3179	1.1956	1.1042	0.9898	0.8361	0.7017	0.6363	0.5475	0.4855	0.4528	0.4282	0.3888	0.371	0.3542	0.3544	0.3694
18	HtMa / HtMa	young	r	C3A2	365.667	53.77	150.68	189.59	190.593	122.158	63.3291	37.0205	24.3414	17.8594	13.5632	11.0386	9.52	7.8489	6.7081	5.5358	4.3251	3.6353	3.1379	2.7796	2.4499	2.2069	2.019	1.8815	1.8087	1.7213	1.6981	1.6778	1.6467	1.6306	1.5312	1.3371	1.1248	0.927	0.7848	0.6761	0.5988	0.5475	0.5002	0.4702	0.4494	0.4171	0.4015	0.4025	0.4186
19	HtMa / HtMi	young	b	C3A2	333.333	40.7087	119.712	170.42	189.191	140.066	85.7191	53.5408	35.9319	25.8181	19.684	16.0873	12.7565	10.5059	8.934	7.2928	6.211	5.4239	4.7567	4.3101	3.9203	3.6929	3.6169	3.5005	3.2905	3.1097	2.8629	2.5376	2.2369	1.9086	1.6244	1.4178	1.334	1.2571	1.1111	0.995	0.9233	0.8546	0.7821	0.6911	0.6612	0.6157	0.5789	0.5733	0.5616
19	HtMa / HtMi	young	r	C3A2	371.333	36.5784	112.59	182.389	207.708	152.001	98.3401	61.8808	42.9173	30.309	23.0853	18.0474	14.8219	11.8413	9.7196	7.927	6.5239	5.588	4.8267	4.2491	3.8167	3.4921	3.3672	3.3181	3.2256	2.9905	2.8151	2.4451	2.1429	1.9041	1.6855	1.4484	1.2479	1.0863	0.9822	0.8842	0.824	0.7676	0.6956	0.6656	0.6412	0.6073	0.5533	0.5148	0.4912
20	HtMa / HtMi	young	b	C3A2	356.333	45.412	124.162	158.573	177.514	146.618	101.127	62.1364	40.2427	29.7867	23.1237	19.1844	15.7237	13.4096	11.6105	9.9798	8.4394	7.3177	6.4691	5.8086	5.1803	4.7593	4.5481	4.5707	4.5823	4.7147	4.7526	4.6803	4.751	4.759	4.892	4.9762	5.0917	5.0894	4.959	4.4502	3.8656	3.4005	2.9553	2.5404	2.1351	1.8836	1.6561	1.4716	1.3037
20	HtMa / HtMi	young	r	C3A2	400	71.7934	161.921	198.678	227.069	195.342	135.197	88.0735	58.4383	44.0285	35.3437	28.5951	23.5359	19.1963	15.7767	13.4718	11.0739	9.3354	8.1442	7.2562	6.4936	6.0827	5.8085	5.6596	5.6033	5.7541	5.8545	5.9318	6.2327	6.489	7.0378	7.2073	7.0479	6.8387	6.2699	5.2531	4.3779	3.6064	3.0523	2.5703	2.2294	2.0323	1.7887	1.5719	1.4114
21	HtMa / HtMi	young	b	C3A2	311.667	67.9621	88.2452	68.5358	69.7663	47.4147	25.8544	16.7713	12.2511	8.9074	6.9791	6.1321	5.6832	5.1317	4.4174	3.9303	3.3947	2.8291	2.4556	2.2007	2.0387	1.8663	1.7573	1.6495	1.6293	1.58	1.5283	1.424	1.2622	1.1105	0.9457	0.8348	0.7533	0.6803	0.6164	0.5632	0.537	0.5025	0.4712	0.4586	0.4514	0.4423	0.4351	0.4407	0.462
21	HtMa / HtMi	young	r	C3A2	347	55.0938	85.1002	73.364	74.0369	51.6832	31.0738	21.4847	14.8783	11.651	9.7561	8.2537	6.9537	5.9283	5.2827	4.5309	3.8435	3.3669	2.9203	2.583	2.3948	2.1936	2.0837	2.1017	2.0977	2.1241	2.189	2.0885	1.9815	1.8195	1.4582	1.1746	1.0009	0.8834	0.7569	0.6691	0.627	0.5724	0.5229	0.4925	0.4605	0.4818	0.4911	0.493	0.4973
22	HtMa / HtMi	young	b	C3A2	367	59.8546	124.037	130.715	151.266	134.127	89.0627	51.2087	31.961	23.2708	17.233	12.4928	9.6319	7.6326	6.0263	4.7612	4.0151	3.4649	3.0787	2.658	2.3164	2.0955	1.9126	1.8307	1.7254	1.6561	1.6872	1.6934	1.6667	1.7351	1.7638	1.681	1.5811	1.3679	1.1769	1.0025	0.8631	0.7817	0.7128	0.6756	0.6608	0.6427	0.6419	0.5738	0.5149
22	HtMa / HtMi	young	r	C3A2	386	55.7021	133.281	149.357	186.134	178.131	147.387	99.8002	58.7652	36.5479	26.1463	19.53	14.8171	11.1377	8.3739	6.4456	5.3228	4.6416	4.0163	3.4814	3.1629	2.9145	2.6067	2.3939	2.2788	2.2248	2.1898	2.1548	2.1705	2.2028	2.2271	2.1677	1.9694	1.6944	1.4319	1.1905	1.0173	0.9163	0.8282	0.8007	0.8028	0.8009	0.7487	0.6966	0.6252
23	HtMa / HtMi	young	b	C3A2	306.333	53.3217	105.423	91.1645	95.5844	80.7678	53.9059	33.0344	20.0128	14.6708	11.1837	8.5893	7.1225	6.0038	5.1533	4.3945	3.6406	3.0692	2.6034	2.2018	1.8479	1.6371	1.4736	1.3606	1.2871	1.2618	1.208	1.1529	1.2208	1.2485	1.2451	1.2399	1.2237	1.1729	1.0452	0.9513	0.8689	0.7683	0.6943	0.6375	0.5947	0.5638	0.5458	0.5273	0.5111
23	HtMa / HtMi	young	r	C3A2	338.333	38.9195	86.4846	104.545	119.368	104.944	84.6327	56.6662	35.4121	23.8072	17.4139	13.3044	10.4822	8.2333	6.5889	5.4477	4.406	3.6175	3.0859	2.598	2.1634	1.858	1.7073	1.5682	1.452	1.3871	1.3386	1.342	1.3369	1.3039	1.278	1.2986	1.2667	1.1915	1.0467	0.9199	0.8386	0.7586	0.6889	0.6325	0.6016	0.586	0.5641	0.5239	0.4786
24	HtMa / HtMi	young	b	C3A2	301.667	44.9485	129.173	189.448	248.748	181.976	92.392	51.7783	32.1775	21.5633	15.2223	11.4737	9.4419	7.7751	6.4796	5.4006	4.4494	3.8086	3.1334	2.7248	2.384	2.0474	1.8765	1.6665	1.5304	1.3754	1.287	1.2078	1.0845	0.967	0.8995	0.8143	0.767	0.7126	0.6615	0.5957	0.5639	0.5428	0.5058	0.485	0.4658	0.4303	0.4058	0.4066	0.3882
24	HtMa / HtMi	young	r	C3A2	335	32.0454	94.0498	147.621	213.45	162.439	81.486	47.5725	30.8231	22.1481	16.3717	12.7799	10.3274	8.6698	7.2525	6.324	5.0432	4.0825	3.4769	3.0032	2.6973	2.3613	2.0467	1.8832	1.7634	1.6307	1.4939	1.3991	1.2638	1.1656	1.0651	0.9734	0.8716	0.8053	0.7447	0.685	0.6453	0.5953	0.5657	0.5141	0.4934	0.4647	0.4484	0.4302	0.4144
25	HtMa / HtMi	young	b	C3A2	331.667	82.7557	197.577	226.49	255.292	166.221	75.3276	44.6735	30.9775	21.2586	15.3664	11.6294	9.3062	7.9413	6.8697	5.9338	5.1258	4.3287	3.7568	3.3372	2.9386	2.6549	2.4818	2.3458	2.2528	2.1407	2.1048	2.0544	1.9393	1.8451	1.7212	1.5536	1.381	1.237	1.1402	1.0267	0.9575	0.9024	0.8412	0.7699	0.7556	0.7396	0.7007	0.6853	0.7073
25	HtMa / HtMi	young	r	C3A2	375.333	79.009	186.389	234.292	286.39	217.199	113.526	66.2719	44.2436	30.5801	22.1756	16.6468	12.6952	10.3373	8.5279	7.0516	6.022	5.1089	4.4205	4.0238	3.5237	3.335	3.117	2.9057	2.8599	2.7141	2.5994	2.4586	2.2627	2.1221	1.9633	1.7705	1.5934	1.4056	1.2511	1.1019	0.976	0.8736	0.8002	0.7559	0.6823	0.6686	0.6601	0.6457	0.6547
26	HtMa / HtMa	young	b	C3A2	302.667	25.9238	57.1834	61.7957	60.7739	43.3313	28.5716	19.4651	13.625	10.5032	8.3518	6.7623	5.5256	4.5516	3.8367	3.3525	2.9226	2.6258	2.3049	2.1163	1.9605	1.8431	1.721	1.6914	1.6423	1.5661	1.4606	1.3838	1.3704	1.2783	1.2308	1.1353	1.0515	0.9711	0.8906	0.8209	0.7799	0.7483	0.7255	0.6939	0.7063	0.7171	0.7902	0.8146	0.8348
26	HtMa / HtMa	young	r	C3A2	350	36.5852	75.9204	78.6801	82.959	70.4408	50.058	33.9789	23.1782	17.3462	13.3517	10.4423	8.3309	7.0365	5.9382	4.8946	4.1529	3.7312	3.2167	2.8756	2.5583	2.4008	2.3183	2.1916	2.0583	1.9229	1.8094	1.8066	1.7082	1.6533	1.5856	1.4786	1.3793	1.2932	1.2017	1.1176	1.0439	0.9855	0.952	0.9292	0.9041	0.8982	0.9205	0.979	1.0946
27	HtMa / HtMi	young	b	C3A2	320.333	64.6194	139.404	127.986	104.52	66.7619	39.3922	26.3728	18.4224	14.1839	11.1697	9.3155	8.1794	7.1266	5.9709	5.0024	4.2394	3.6901	3.23	2.9423	2.5962	2.3346	2.1345	2.0099	1.8617	1.7635	1.6516	1.5081	1.4038	1.321	1.2376	1.1532	1.1167	1.0546	0.9714	0.9291	0.8863	0.8629	0.8412	0.7892	0.7469	0.6924	0.678	0.6863	0.7001
27	HtMa / HtMi	young	r	C3A2	364.667	60.0615	117.517	124.832	113.099	84.635	56.2218	36.9015	26.5781	19.7004	15.5892	12.9183	10.8046	9.0623	7.6869	6.2865	5.2486	4.4517	3.8507	3.4526	3.0473	2.7761	2.5956	2.5169	2.3425	2.176	1.9931	1.9071	1.7587	1.6497	1.5656	1.473	1.3598	1.3038	1.2408	1.1906	1.11	1.042	0.9865	0.9518	0.9235	0.8841	0.8672	0.8707	0.8998
90	HtMa / HtMi	young	b	C3A2	297.333	25.756	64.1683	74.4095	75.0153	49.9787	26.7496	17.2716	12.6446	9.88603	7.84877	6.59855	5.59323	4.72163	4.14797	3.67477	3.05817	2.60248	2.2039	1.84945	1.63255	1.48228	1.40047	1.29735	1.23287	1.20745	1.1695	1.0661	0.9607	0.881825	0.806225	0.7063	0.63135	0.576275	0.5141	0.468075	0.445875	0.4229	0.40165	0.3747	0.370025	0.3801	0.41335	0.445525	0.456325
90	HtMa / HtMi	young	r	C3A2	362.667	27.4017	71.5263	92.6218	110.004	84.3779	49.3841	30.636	21.6183	16.765	12.7579	9.94753	8.22568	7.0733	5.96385	5.1077	4.20507	3.4048	2.8767	2.4735	2.1641	1.9713	1.8612	1.70932	1.6351	1.57212	1.51782	1.46663	1.34425	1.24457	1.123	0.978075	0.859175	0.755275	0.6679	0.60985	0.546425	0.4935	0.476375	0.4676	0.455575	0.462775	0.477375	0.503225	0.525825
92	HtMi / HtMi	young	b	C3A2	342.667	27.2016	60.0637	58.3978	68.1796	63.8449	50.6527	34.6643	22.9431	17.0802	13.9168	11.045	8.93303	7.54788	6.1196	4.8822	3.92205	3.3053	2.95055	2.6791	2.47447	2.36863	2.31528	2.38835	2.44975	2.53138	2.49887	2.28638	2.0839	1.94905	1.83285	1.6884	1.6217	1.57475	1.50165	1.38755	1.26947	1.1612	1.08403	0.985575	0.890975	0.8093	0.76515	0.72995	0.701875
92	HtMi / HtMi	young	r	C3A2	370.333	40.7219	90.0096	85.5262	111.133	108.931	82.1845	59.474	43.3536	31.4406	23.2601	18.6981	15.7256	12.9004	10.3843	8.1456	6.59973	5.1917	4.39735	3.9027	3.63143	3.49173	3.40008	3.31082	3.3802	3.58475	3.97515	4.16145	3.98177	3.3243	2.92738	2.78585	2.59355	2.30278	2.10922	1.92738	1.8796	1.87803	1.68675	1.37587	1.12815	0.952875	0.854025	0.782725	0.724025
94	HtMa / HtMi	young	b	C3A2	298	33.8794	79.8644	85.5741	96.8406	69.2564	36.5349	21.3276	14.701	11.3337	9.0939	7.60257	6.5418	5.78545	4.99595	4.37645	3.9031	3.3037	2.8504	2.55773	2.27767	2.11015	1.98578	1.86878	1.80058	1.67965	1.5444	1.48542	1.42692	1.30923	1.22542	1.15688	1.06655	1.00605	0.927425	0.833875	0.768675	0.72195	0.658775	0.60115	0.567725	0.5457	0.522	0.475075	0.435675
94	HtMa / HtMi	young	r	C3A2	366.333	67.9748	149.109	143.491	164.58	127.342	72.4753	41.5899	25.9729	18.3574	14.0156	11.3699	9.22077	7.67905	6.58955	5.5222	4.8041	4.06125	3.49385	3.03675	2.7071	2.54115	2.3624	2.18	2.0313	1.95023	1.86037	1.82963	1.77385	1.72893	1.67065	1.56765	1.42825	1.2572	1.1388	1.02868	0.94445	0.872825	0.8128	0.782525	0.773775	0.76525	0.7411	0.631175	0.528225
97	HtMa / HtMa	young	b	C3A2	283.333	28.9805	67.0877	51.4353	43.5848	36.4524	25.5242	17.8685	13.2734	10.5189	8.75548	7.67638	7.04927	6.2763	5.47863	4.66295	3.9665	3.37213	3.08555	2.75645	2.445	2.34863	2.3108	2.25447	2.2111	2.24737	2.3367	2.42108	2.5577	2.75515	2.81747	2.70812	2.42125	2.07817	1.75608	1.48507	1.25743	1.06688	0.930075	0.798575	0.7192	0.653425	0.605925	0.5705	0.5003
97	HtMa / HtMa	young	r	C3A2	286.333	53.2423	97.8561	66.5195	64.4511	59.7006	48.674	30.3039	20.0368	15.4344	12.8401	10.5872	8.87813	7.73508	6.492	5.42683	4.72513	4.08023	3.4199	3.0667	2.76302	2.53812	2.4491	2.46322	2.39438	2.44635	2.5161	2.64907	2.97768	3.15945	3.11868	2.80978	2.30293	1.93375	1.5688	1.25818	1.1075	0.962175	0.828225	0.74975	0.69165	0.62785	0.592125	0.52865	0.464225
99	HtMa / HtMa	young	b	C3A2	293	16.0167	42.7607	56.4999	73.3438	53.9035	28.3715	17.8846	13.3713	10.8449	8.73118	7.13133	6.13208	5.0573	4.18175	3.54948	2.98325	2.43845	2.15965	1.90552	1.62795	1.42148	1.28385	1.1935	1.0848	0.984175	0.890175	0.803825	0.751675	0.683175	0.584325	0.528775	0.49715	0.462675	0.43585	0.4174	0.390525	0.38	0.38555	0.382675	0.3944	0.4092	0.39445	0.39485	0.387975
99	HtMa / HtMa	young	r	C3A2	323.333	63.6793	108.054	68.6047	84.6889	85.1599	47.8905	27.3847	18.8419	14.4777	11.6473	9.23408	7.12223	5.9212	4.94207	3.96505	3.25497	2.75628	2.36985	2.0712	1.80295	1.533	1.37563	1.2722	1.1558	1.04022	0.92685	0.837625	0.77165	0.710775	0.647325	0.585025	0.5338	0.489225	0.464675	0.4302	0.40655	0.387525	0.372875	0.38365	0.39785	0.39965	0.40265	0.38645	0.375875
101	HtMi / HtMi	young	b	C3A2	343.667	37.8289	99.2657	116.255	123.461	98.2983	64.7679	39.3919	25.5269	17.6646	13.3575	10.0327	8.27543	7.07885	6.19372	5.18997	4.36025	3.7777	3.26523	2.90198	2.6834	2.53385	2.39177	2.32837	2.29763	2.18063	2.07357	2.0487	2.00215	1.93485	1.89045	1.77715	1.66883	1.57755	1.49825	1.4267	1.39003	1.37183	1.45473	1.53448	1.60878	1.7068	1.82393	1.78215	1.63765
101	HtMi / HtMi	young	r	C3A2	329.333	65.0499	158.154	149.1	160.3	146.837	106.236	67.6045	44.8529	31.084	22.8758	16.7168	13.124	10.4759	8.61543	7.3121	6.1965	5.2183	4.46647	3.94672	3.60412	3.3457	3.17112	2.94975	2.72503	2.5943	2.50712	2.4682	2.42465	2.3597	2.42355	2.46037	2.45323	2.29025	2.30262	2.28658	2.26288	2.40687	2.70922	2.96675	3.67022	4.1814	4.37015	4.1028	3.18725
108	HtMa / HtMi	young	b	C3A2	329	26.9705	60.4764	60.0695	61.9449	46.6823	31.3923	20.9992	14.8015	11.7112	9.5309	7.6904	6.76067	6.15265	5.1937	4.45723	3.91757	3.47705	3.08075	2.69675	2.40025	2.08568	1.9299	1.82197	1.6919	1.53943	1.41465	1.33137	1.22283	1.1751	1.07862	1.01667	0.952025	0.8957	0.838425	0.789375	0.742625	0.7194	0.723825	0.6956	0.65495	0.677825	0.657575	0.6197	0.60515
108	HtMa / HtMi	young	r	C3A2	332	39.0297	82.5204	78.1083	80.8507	64.8075	47.082	31.0023	21.4872	16.9394	13.8904	11.5145	9.46262	7.83742	6.3775	5.37555	4.52305	3.8516	3.4307	3.08985	2.75152	2.53572	2.32057	2.14443	1.99253	1.8866	1.738	1.5706	1.45913	1.37613	1.2702	1.1786	1.13072	1.06385	0.983975	0.90475	0.844025	0.81325	0.792625	0.8205	0.902175	0.937625	0.854725	0.7661	0.7027
115	HtMa / HtMa	young	b	C3A2	294.667	23.8024	55.6755	62.2591	63.3857	49.1749	33.5577	22.8214	16.467	12.917	10.6874	8.8643	7.44613	6.27653	5.08615	4.2344	3.59085	3.02038	2.6408	2.30835	2.10453	1.89362	1.75782	1.61175	1.50673	1.45637	1.37033	1.3052	1.28165	1.2669	1.252	1.1708	1.18095	1.16572	1.10605	1.04615	0.98995	0.947675	0.902025	0.825575	0.76505	0.697425	0.6607	0.627225	0.613925
115	HtMa / HtMa	young	r	C3A2	307	33.8624	73.3156	76.3742	81.0825	65.5851	50.8867	37.7746	26.8047	19.9184	15.4243	12.3359	9.5309	7.5954	6.02645	4.9823	4.18063	3.62425	3.19915	2.72662	2.40618	2.1873	1.97598	1.83105	1.73677	1.62383	1.5312	1.47497	1.44185	1.42092	1.43375	1.37033	1.28883	1.2379	1.21443	1.13375	1.0641	0.98905	0.923525	0.842	0.775575	0.750275	0.7061	0.6751	0.674225
119	HtMa / HtMa	young	b	C3A2	294.333	19.5828	46.8252	54.0491	61.6121	46.8182	29.6809	20.864	15.2826	12.725	10.4795	8.23705	7.06107	6.16632	5.0379	4.00633	3.38945	2.8676	2.48045	2.20748	1.96138	1.75005	1.66952	1.51835	1.387	1.23392	1.08773	0.98425	0.87025	0.773525	0.7039	0.642075	0.578725	0.513975	0.4668	0.449775	0.42955	0.4074	0.391475	0.376375	0.360575	0.358475	0.38145	0.4026	0.45725
119	HtMa / HtMa	young	r	C3A2	350	28.0435	68.4083	73.4828	84.5334	68.164	46.2918	34.7982	27.5326	21.3981	17.4086	14.4167	11.8114	9.49638	7.61592	5.91055	4.62105	3.77988	3.13045	2.7308	2.46312	2.13587	1.93043	1.80645	1.68718	1.563	1.3466	1.24117	1.1325	1.01978	0.94905	0.842425	0.746675	0.66035	0.6111	0.56685	0.52875	0.492175	0.47775	0.4482	0.41775	0.422825	0.438825	0.48985	0.55465
129	HtMa / HtMa	young	b	C3A2	313	17.9496	44.0411	44.9952	38.3489	28.7868	20.0376	14.1467	10.2986	8.34492	6.9837	5.64217	4.45665	3.83228	3.26132	2.7329	2.3688	2.11457	1.87205	1.7015	1.55242	1.43792	1.33977	1.23695	1.14285	1.0068	0.930325	0.856075	0.80475	0.71165	0.63625	0.557925	0.482325	0.416575	0.370775	0.33915	0.33275	0.3223	0.31885	0.309475	0.29255	0.276175	0.268025	0.285975	0.3026
129	HtMa / HtMa	young	r	C3A2	370	22.7732	53.6677	54.1597	51.4711	42.5063	29.8539	19.442	14.3887	11.5837	9.32925	7.76738	6.45005	5.34125	4.34915	3.56055	2.98353	2.498	2.15395	1.9056	1.72622	1.6214	1.51327	1.3187	1.2146	1.12458	1.03625	0.9786	0.9354	0.875775	0.7823	0.705675	0.6478	0.567975	0.48365	0.43545	0.40535	0.405825	0.4136	0.3965	0.377175	0.34815	0.322625	0.316025	0.31995
131	HtMa / HtMa	young	b	C3A2	317.333	16.0514	38.0975	39.1424	38.2586	27.7842	16.6661	10.9501	7.85823	6.32535	5.2762	4.45962	3.9121	3.22472	2.72915	2.29062	1.98192	1.70802	1.4574	1.2763	1.1307	1.04315	0.946125	0.859425	0.804375	0.7641	0.7044	0.668875	0.626775	0.587225	0.56215	0.514175	0.4737	0.439475	0.39845	0.36285	0.32905	0.29955	0.2744	0.258975	0.25065	0.24415	0.2495	0.25805	0.27295
131	HtMa / HtMa	young	r	C3A2	356.333	13.982	36.1979	43.1067	46.6883	37.9804	24.7786	14.9354	10.9676	8.85517	7.11397	6.10442	5.09448	4.03423	3.30503	2.75438	2.3695	1.98545	1.64023	1.4703	1.31255	1.17142	1.06155	1.00323	0.9166	0.859325	0.81215	0.77595	0.745325	0.725	0.694875	0.675875	0.6307	0.56635	0.510475	0.45515	0.408425	0.373425	0.345525	0.335275	0.3253	0.312225	0.31305	0.317	0.330225
132	HtMa / HtMa	young	b	C3A2	315.333	37.6059	89.1754	79.7673	77.2976	66.5293	53.3455	37.5744	25.073	18.7388	14.7073	11.5457	9.52858	7.8405	6.3437	5.44937	4.6502	3.96007	3.37825	2.8001	2.4526	2.17605	1.89013	1.62468	1.4483	1.36655	1.30258	1.25608	1.26937	1.273	1.2859	1.31153	1.33145	1.29865	1.27462	1.16762	1.01438	0.90125	0.80725	0.729125	0.646475	0.588125	0.554425	0.56215	0.57365
132	HtMa / HtMa	young	r	C3A2	356.667	56.1434	114.687	92.636	86.0776	77.6067	65.9383	50.6604	33.7248	23.7511	18.6446	14.7888	11.7497	9.02463	7.40038	6.03522	4.84187	4.16202	3.49855	2.98723	2.58663	2.2299	1.98537	1.7604	1.62868	1.52973	1.47253	1.45305	1.43365	1.41997	1.46065	1.49348	1.57265	1.61435	1.57313	1.50248	1.38062	1.24063	1.07078	0.943225	0.809575	0.718975	0.628925	0.590375	0.58295
134	HtMa / HtMa	young	b	C3A2	285.667	23.3299	58.3173	53.9308	47.157	35.452	23.8198	15.987	10.9781	8.22907	6.71248	5.58127	4.94252	4.34265	3.83833	3.46552	3.14415	2.76085	2.41102	2.07693	1.87898	1.83735	1.72365	1.69885	1.71093	1.71313	1.66345	1.68332	1.75483	1.81092	1.87387	1.95027	2.04287	2.04075	2.03315	1.87275	1.76727	1.68825	1.52642	1.4103	1.32015	1.25588	1.1851	1.06543	0.89535
134	HtMa / HtMa	young	r	C3A2	304.667	22.8077	60.4885	77.2172	81.3474	66.7478	45.2841	29.9444	20.86	15.3733	11.9637	9.6362	8.18765	7.22583	6.34665	5.44005	4.6903	4.08465	3.52813	3.07742	2.81898	2.68533	2.59402	2.56862	2.59733	2.55995	2.6441	2.64597	2.69097	2.71177	2.6533	2.62245	2.47803	2.43282	2.32832	2.16275	2.07925	1.87235	1.7134	1.6974	1.6304	1.692	1.63205	1.40647	1.11593
136	HtMa / HtMi	young	b	C3A2	307.667	39.6035	101.888	125.987	134.089	102.546	65.2468	42.0475	27.5093	19.4783	16.251	14.1608	11.6032	9.62705	8.24537	6.83105	5.71812	4.66175	3.94065	3.52692	3.05035	2.7834	2.66967	2.50208	2.37407	2.33105	2.26555	2.12938	1.94392	1.8048	1.66162	1.4274	1.20473	1.01815	0.835825	0.6972	0.60655	0.527725	0.45425	0.394025	0.3646	0.34885	0.34335	0.343675	0.3502
136	HtMa / HtMi	young	r	C3A2	348	42.5629	103.318	125.625	154.787	131.626	86.1155	55.7165	38.5174	28.2315	22.9028	19.2283	15.8246	12.8686	10.2403	8.28223	6.54065	5.4837	4.7354	3.95377	3.45485	3.1261	2.8498	2.6808	2.6042	2.5414	2.44238	2.32465	2.22012	2.09337	1.8773	1.6673	1.4639	1.20358	0.9834	0.84755	0.70885	0.594575	0.515825	0.46175	0.42485	0.40885	0.37055	0.3712	0.3842
149	HtMa / HtMi	young	b	C3A2	313.333	19.3632	47.2934	48.449	52.3751	42.884	28.1146	19.5906	13.8185	10.246	7.84323	6.48635	5.39555	4.69955	4.22385	3.78005	3.37705	2.91208	2.58228	2.24708	1.97045	1.7956	1.6985	1.5741	1.4773	1.45093	1.37447	1.3024	1.2768	1.27398	1.27095	1.21873	1.20237	1.18165	1.1444	1.10235	1.01192	0.90685	0.8125	0.73465	0.68045	0.6335	0.61175	0.5601	0.509675
149	HtMa / HtMi	young	r	C3A2	356	44.8261	90.8261	60.295	65.667	65.9208	47.8986	29.1814	19.7111	14.6341	11.3635	8.82312	7.43372	6.37068	5.52048	4.68985	4.09277	3.6446	3.22142	2.81787	2.51478	2.30888	2.16205	1.97982	1.83852	1.76327	1.73398	1.6563	1.61282	1.57842	1.51683	1.44362	1.36997	1.30255	1.2428	1.14635	1.04885	0.9668	0.86765	0.804375	0.74295	0.68055	0.624675	0.56685	0.525925
153	HtMa / HtMi	young	b	C3A2	306.667	42.8	109.73	118.979	140.02	120.66	83.7931	57.8627	44.5617	32.6876	26.2058	21.9519	17.0949	14.2638	12.5308	10.658	8.81118	7.3317	6.50815	5.61902	4.9407	4.46467	3.89988	3.41153	3.16768	2.83878	2.66323	2.49415	2.32662	2.2228	2.10025	1.9207	1.70135	1.56717	1.44023	1.3608	1.23418	1.1676	1.11468	1.04115	0.95415	0.911525	0.91055	0.88455	0.884175
153	HtMa / HtMi	young	r	C3A2	376	47.4892	125.952	149.593	192.613	186.941	141.925	102.008	77.284	58.8871	47.7321	37.1197	28.9213	22.904	17.8499	14.3158	11.5236	9.48915	7.55457	6.4528	5.77785	5.3002	4.75205	4.13903	3.6739	3.33498	3.16407	3.006	2.83643	2.699	2.5687	2.3698	2.1825	2.00295	1.80465	1.6733	1.50385	1.36138	1.2785	1.16387	1.12085	1.0989	1.06335	1.06593	1.10195
160	HtMa / HtMa	young	b	C3A2	311.667	19.3205	54.9049	73.2506	84.7841	70.769	48.3892	32.9141	22.0509	16.3624	12.104	9.42093	7.6405	6.33842	5.4149	4.65385	4.10192	3.63758	3.1739	2.93038	2.68942	2.42853	2.29818	2.26463	2.17453	2.04405	1.93385	1.76378	1.52747	1.3833	1.26245	1.18607	1.09783	1.0345	0.982625	0.906825	0.8514	0.80275	0.75215	0.7102	0.679575	0.6626	0.6639	0.6802	0.73405
160	HtMa / HtMa	young	r	C3A2	386	55.6508	124.291	98.5535	106.023	105.783	85.2243	54.9669	34.0671	23.5916	17.5759	14.4371	11.3287	9.05932	7.6408	6.4402	5.37498	4.7023	4.23398	3.7965	3.41317	3.1352	2.90503	2.79438	2.62145	2.50422	2.3716	2.20872	1.99495	1.76045	1.55435	1.39135	1.24548	1.153	1.05705	0.955675	0.87835	0.80455	0.751875	0.720975	0.683875	0.6283	0.6027	0.595825	0.60175
162	HtMa / HtMi	young	b	C3A2	307.667	34.7743	66.334	55.8801	59.6397	47.9609	27.8678	16.6025	11.5543	8.39035	6.7397	5.45523	4.63342	4.11085	3.65453	3.06585	2.46667	2.13515	1.78497	1.60173	1.46693	1.3413	1.25438	1.23745	1.18712	1.15308	1.11052	1.10465	1.09557	1.14065	1.16518	1.1564	1.134	1.12922	1.11932	1.09805	1.06763	1.0642	1.00962	0.941625	0.9107	0.879075	0.842825	0.76805	0.691125
162	HtMa / HtMi	young	r	C3A2	287	23.359	51.7968	56.192	68.5473	63.7773	46.283	27.1178	17.3774	12.4569	10.0349	8.2492	6.99118	5.81485	4.86852	4.01318	3.39942	2.87045	2.44425	2.12597	1.91435	1.73388	1.5832	1.50618	1.42312	1.39472	1.34167	1.27265	1.27677	1.27262	1.2714	1.2716	1.24477	1.2221	1.16017	1.15805	1.12243	1.08512	1.06595	1.04042	1.02052	1.03497	1.06435	1.11007	1.08095
170	HtMi / HtMi	young	b	C3A2	314	24.0928	58.5294	60.5225	69.6231	66.212	45.6044	27.455	18.4741	14.382	11.7423	9.91442	8.2391	6.9432	5.79887	4.91795	4.13387	3.49308	3.03753	2.81283	2.57362	2.31168	2.23778	2.03607	1.8805	1.82295	1.834	1.79448	1.77277	1.76815	1.7392	1.74772	1.7443	1.67182	1.58787	1.49408	1.39395	1.2936	1.19798	1.1268	1.08945	1.05927	0.9901	0.954225	0.899075
170	HtMi / HtMi	young	r	C3A2	391	26.3093	64.9659	76.3649	88.3139	87.0547	72.3243	45.8309	29.899	22.335	18.097	15.4418	12.9798	10.3925	8.4587	6.84298	5.699	4.75432	4.14492	3.7688	3.25168	2.95458	2.73665	2.47812	2.33275	2.2694	2.2635	2.2794	2.3001	2.30302	2.341	2.35842	2.27062	2.133	1.99232	1.86862	1.73687	1.63023	1.58205	1.53642	1.51957	1.5009	1.33502	1.17375	1.07305
178	HtMa / HtMi	young	b	C3A2	318	26.3626	54.2785	91.2114	111.442	70.8243	36.1447	22.5047	15.7544	11.3629	9.1678	7.7307	6.908	5.9624	5.2333	4.7193	4.1003	3.5181	3.2326	2.9333	2.77	2.6172	2.5644	2.4496	2.2705	2.0938	1.9369	1.7859	1.6492	1.4876	1.3398	1.2275	1.1018	1.0087	0.9303	0.8671	0.8163	0.7306	0.6688	0.6409	0.6019	0.57	0.5379	0.5046	0.4881
178	HtMa / HtMi	young	r	C3A2	339.333	35.1913	70.2478	104.46	126.066	100.871	56.7926	31.1759	21.2062	15.5457	12.0065	9.9118	8.4374	7.3414	6.4541	5.4686	4.7887	4.1375	3.5525	3.2857	3.0557	2.8055	2.6594	2.5184	2.4647	2.365	2.1781	2.0221	1.8749	1.7465	1.5837	1.4368	1.2618	1.1265	1.0358	0.975	0.886	0.803	0.7542	0.7244	0.715	0.6504	0.6035	0.591	0.5889
186	HtMa / HtMa	young	b	C3A2	313.333	25.7751	56.6063	88.3053	91.8304	70.0901	48.0479	30.7528	19.6702	14.7977	11.0583	8.5189	7.4146	6.6333	5.9266	5.4477	4.9022	4.4616	4.0153	3.6145	3.4218	3.3397	3.2971	3.3571	3.4675	3.4867	3.3272	3.2347	3.2547	3.2096	3.0448	2.7103	2.3537	2.023	1.7677	1.5025	1.3147	1.1196	1.0413	0.9985	0.9651	0.9112	0.9739	1.0408	1.0101
186	HtMa / HtMa	young	r	C3A2	346.333	32.0522	67.7162	104.268	110.323	94.4022	73.5182	50.4156	32.6466	22.18	16.6991	13.2436	11.3083	9.3995	8.0514	7.132	6.1723	5.4464	4.755	4.4338	4.1618	3.9864	3.8838	4.032	4.194	4.0543	3.9868	4.1039	4.1411	3.9778	3.6001	3.1428	2.7546	2.4375	2.0982	1.8843	1.6498	1.5092	1.4491	1.4213	1.516	1.7865	2.0326	2.0403	1.7116
192	HtMa / HtMi	young	b	C3A2	377.667	41.3903	102.243	178.973	174.163	115.754	69.3014	39.0991	24.7348	18.5234	14.1125	11.1301	8.8933	7.2727	5.995	4.9307	4.2231	3.7751	3.3275	2.9698	2.63	2.4187	2.2291	2.1177	2.0314	1.9463	1.9268	1.8381	1.8164	1.7694	1.7241	1.671	1.6073	1.5308	1.4511	1.3843	1.2922	1.2353	1.1072	0.9538	0.8579	0.7801	0.7174	0.6819	0.6536
192	HtMa / HtMi	young	r	C3A2	420.667	57.2069	130.078	219.835	239.202	189.623	114.427	59.6288	35.8802	25.2823	19.5671	15.7279	12.3779	9.8264	8.0829	6.6319	5.5302	4.6955	4.1517	3.6319	3.2161	2.9276	2.7116	2.5427	2.4381	2.406	2.3682	2.3553	2.3825	2.4078	2.3104	2.1167	1.8701	1.7056	1.5991	1.5013	1.39	1.2448	1.0973	1.0113	0.9201	0.8219	0.7767	0.7259	0.6818
199	HtMa / HtMa	young	b	C3A2	291.333	22.184	47.0339	66.3462	66.4441	56.3835	39.7421	26.5309	18.4843	13.8264	10.8974	8.9418	7.4346	6.5386	5.6003	4.9705	4.2641	3.5919	3.0787	2.7696	2.5468	2.4478	2.2968	2.3222	2.3866	2.4829	2.5817	2.6091	2.6223	2.6044	2.5681	2.4476	2.475	2.5243	2.4821	2.375	2.2214	2.1378	2.0467	1.9292	1.8915	1.8541	1.7751	1.725	1.596
199	HtMa / HtMa	young	r	C3A2	305.333	24.7796	53.5078	82.974	95.8569	83.1989	58.0241	42.2114	30.3301	22.4901	17.0849	13.2654	10.7253	8.9017	7.2655	5.9819	5.1239	4.2983	3.8097	3.3921	3.0746	2.9713	2.9116	2.8725	2.9265	2.9438	3.078	3.172	3.2366	3.1751	3.1214	3.044	2.8817	2.7314	2.6719	2.5666	2.4651	2.3462	2.3094	2.2827	2.2824	2.3641	2.2253	1.973	1.693
202	HtMa / HtMa	young	b	C3A2	299	9.433	17.452	22.4735	23.7979	22.1089	17.2686	11.8751	8.7817	7.5428	6.8398	6.3685	5.9932	5.3053	4.3064	3.3685	2.7576	2.3018	1.9306	1.6816	1.4533	1.2985	1.1903	1.0694	0.9863	0.9164	0.8271	0.7983	0.758	0.7094	0.671	0.6392	0.593	0.5648	0.5378	0.4996	0.4706	0.4677	0.4567	0.4291	0.4104	0.3968	0.3888	0.4224	0.4501
202	HtMa / HtMa	young	r	C3A2	336.333	38.2069	68.0224	65.9146	51.8458	45.8562	36.8812	27.9029	20.1712	15.7361	14.1088	13.154	11.8394	9.5494	7.183	5.3797	4.1697	3.376	2.8201	2.4162	2.077	1.7989	1.6321	1.4917	1.3264	1.2328	1.1111	1.0435	1.0086	0.9378	0.8609	0.8169	0.7775	0.7243	0.6793	0.6163	0.5664	0.5313	0.4809	0.4457	0.4414	0.4462	0.4701	0.5009	0.5187
222	HtMa / HtMi	young	b	C3A2	342	13.5539	29.6728	49.737	56.2358	43.8958	30.6489	20.1252	13.7932	10.3674	8.2287	6.781	5.7705	4.9372	4.1391	3.5239	3.0396	2.688	2.4616	2.2318	2.0654	1.9882	1.9472	1.9051	1.8693	1.8763	1.8276	1.8295	1.8472	1.8665	1.8486	1.9626	1.9627	1.8109	1.6326	1.3988	1.1646	1.0099	0.8806	0.7628	0.6636	0.5907	0.5457	0.5079	0.4625
222	HtMa / HtMi	young	r	C3A2	388.667	15.5236	34.6987	61.2897	75.6362	60.4763	43.0197	28.9766	19.6401	15.0182	12.1034	9.8668	8.2268	6.7034	5.3984	4.6475	4.0014	3.4661	3.0709	2.7885	2.5963	2.414	2.2737	2.1046	2.0168	2.0097	1.9701	1.9375	1.8991	1.9324	1.8861	1.9498	1.9384	1.8319	1.6324	1.4243	1.1882	1.0049	0.887	0.7825	0.7054	0.6513	0.629	0.585	0.5296
226	HtMa / HtMa	young	r	C3A2	340.333	45.5988	89.3149	126.151	141.509	116.039	76.108	50.1186	32.212	22.8739	17.9519	15.4918	13.1122	11.1769	9.2192	7.413	6.2544	5.1833	4.526	3.8741	3.4421	3.2178	2.9455	2.7829	2.7269	2.6914	2.6772	2.6907	2.7513	2.8715	3.0635	2.9856	2.7183	2.4048	1.9996	1.6885	1.4151	1.2446	1.0797	0.9542	0.888	0.8575	0.8517	0.8378	0.8504
231	HtMa / HtMi	young	b	C3A2	315	14.8802	33.699	55.8213	62.4319	50.2553	32.824	20.9022	13.2959	8.9211	7.077	5.9511	5.2577	4.5371	3.9533	3.4399	2.9848	2.6217	2.2169	1.9356	1.7706	1.6694	1.6393	1.6056	1.5756	1.5183	1.5224	1.5213	1.5161	1.4884	1.4074	1.3098	1.1764	1.088	0.9992	0.9146	0.8552	0.7874	0.7365	0.6828	0.6161	0.5959	0.5896	0.5768	0.5428
231	HtMa / HtMi	young	r	C3A2	348	19.7991	39.9532	62.8759	75.8435	67.3612	52.3605	34.7821	21.2778	14.638	11.495	9.5323	8.1046	7.0352	6.1706	5.0881	4.2601	3.5727	3.0539	2.7644	2.417	2.2416	2.1635	2.1265	2.0708	1.9933	1.9157	1.8314	1.7553	1.7077	1.6021	1.4212	1.3241	1.1913	1.0698	0.9653	0.8867	0.8538	0.7981	0.786	0.8052	0.8047	0.8159	0.7762	0.6904
232	HtMa / HtMa	young	b	C3A2	357.333	39.855	79.2825	108.737	119.79	104.291	73.318	48.425	33.9343	24.135	18.1723	14.3312	11.6168	9.1724	7.1049	5.7955	4.7594	4.1142	3.432	3.0221	2.7578	2.51	2.3489	2.2591	2.2137	2.2065	2.2111	2.1756	2.079	1.8924	1.5885	1.2978	1.1105	0.9364	0.7949	0.6954	0.6297	0.5757	0.5399	0.5121	0.5015	0.5068	0.5228	0.5266	0.5354
232	HtMa / HtMa	young	r	C3A2	371.333	36.7358	75.6726	114.094	136.235	125.663	95.45	70.1276	48.8809	35.5722	26.8914	21.0455	16.6266	13.2438	10.2714	8.0624	6.5101	5.3675	4.428	3.8019	3.3911	3.0851	2.8706	2.6372	2.5243	2.505	2.5031	2.5202	2.5003	2.2799	1.925	1.5198	1.2024	0.9984	0.8438	0.7281	0.6427	0.6156	0.5787	0.5573	0.5372	0.5236	0.5215	0.5113	0.5031
234	HtMa / HtMa	young	b	C3A2	298.667	25.1335	51.6707	70.3458	66.9137	52.6235	34.5376	22.1553	14.9071	10.8387	8.8199	7.4134	6.3771	5.5709	4.9482	4.3014	3.7429	3.3032	2.8095	2.4697	2.2816	2.0813	2.0232	1.9152	1.8052	1.7393	1.7112	1.6638	1.6354	1.5908	1.6149	1.6801	1.7173	1.6687	1.5977	1.4919	1.3502	1.1884	1.0586	0.9125	0.838	0.7992	0.7643	0.7001	0.6521
234	HtMa / HtMa	young	r	C3A2	314.667	24.872	52.7749	85.5443	102.102	91.288	62.0609	40.6074	25.5403	18.4759	14.6387	10.9349	8.8789	7.4084	6.005	4.9764	4.1243	3.5086	3.0434	2.6673	2.4425	2.3276	2.3523	2.3315	2.3366	2.268	2.2295	2.1402	2.0814	2.0849	2.1476	2.1672	2.122	1.9636	1.7921	1.6007	1.4226	1.2546	1.0417	0.9359	0.8922	0.8139	0.7595	0.6968	0.643
239	HtMa / HtMi	young	b	C3A2	328	144.978	256.693	246.674	186.26	145.978	95.0712	58.8868	39.8028	28.6659	22.2895	18.1838	15.3773	12.9212	10.4121	9.1649	7.592	6.588	5.7326	5.1021	4.462	3.9005	3.7077	3.4734	3.2496	3.091	2.8624	2.7517	2.6879	2.6753	2.6564	2.6107	2.6882	2.7213	2.7622	2.5987	2.4921	2.2807	2.0307	1.8289	1.5924	1.3414	1.1341	0.9739	0.8734
239	HtMa / HtMi	young	r	C3A2	415	69.7524	140.399	194.01	212.371	190.543	140.339	90.0484	56.3267	40.8468	31.8621	27.25	24.7201	20.0866	16.0216	12.521	9.6318	7.9088	6.7581	5.8285	5.204	4.5337	4.202	3.8694	3.5786	3.3683	3.1764	2.9331	2.7922	2.6475	2.5618	2.581	2.5536	2.5713	2.5802	2.5694	2.4831	2.397	2.2302	2.0036	1.7618	1.4495	1.1438	0.9875	0.8734
244	HtMa / HtMa	young	b	C3A2	292.667	61.0961	126.376	166.906	139.758	85.1738	43.6885	24.6011	16.3569	12.0914	9.908	8.4524	7.7129	6.85	5.8789	5.1049	4.2613	3.5917	3.0251	2.6151	2.4089	2.2838	2.1479	2.0107	1.9008	1.7994	1.6946	1.5564	1.5077	1.4398	1.3635	1.3116	1.2208	1.1301	1.1069	1.0728	1.0384	1.0279	1.0293	0.9929	0.9682	0.9858	1.0943	1.2316	1.3248
244	HtMa / HtMa	young	r	C3A2	379	74.1063	160.419	248.716	250.802	170	88.3591	46.9517	29.7671	21.3373	16.3673	13.3634	11.4065	10.0941	8.6932	6.9049	5.6522	4.8144	4.004	3.5191	3.2293	2.8988	2.6775	2.5781	2.4637	2.3298	2.2444	2.2142	2.1016	1.9632	1.7711	1.6345	1.5474	1.4667	1.3479	1.2636	1.2041	1.169	1.1149	1.1287	1.1593	1.2874	1.607	1.979	2.087
257	HtMa / HtMa	young	b	C3A2	271.667	20.2718	43.535	66.1644	72.8044	60.4397	45.3909	29.0766	18.5231	13.2271	10.9807	9.0241	7.6562	6.487	5.4823	4.694	3.8829	3.2604	2.7941	2.4309	2.2305	2.0007	1.787	1.6221	1.5118	1.3831	1.304	1.2601	1.1546	1.0621	1.0021	0.8838	0.8253	0.771	0.676	0.6043	0.5672	0.5169	0.4709	0.452	0.4265	0.3933	0.3556	0.3347	0.3131
257	HtMa / HtMa	young	r	C3A2	369	22.4165	44.659	62.1357	68.164	61.6872	55.4427	43.9548	26.5777	17.3362	13.6707	11.6955	9.9876	8.2044	6.6358	5.2891	4.3387	3.613	3.1298	2.7245	2.4776	2.2865	2.0637	1.8842	1.7563	1.6577	1.534	1.4602	1.395	1.2763	1.1842	1.0742	0.9653	0.8719	0.7848	0.7	0.6162	0.5586	0.4938	0.4663	0.4298	0.3888	0.3498	0.3239	0.3075
275	HtMa / HtMi	young	b	C3A2	320.667	18.7939	37.8615	53.5996	59.4231	54.3454	36.28	21.9243	14.3496	9.924	7.5758	6.0394	5.0957	4.3824	3.7054	3.2147	2.7194	2.3371	2.0045	1.7569	1.5477	1.4259	1.3445	1.2485	1.1283	1.0516	0.9872	0.9042	0.8692	0.8512	0.8277	0.8232	0.7992	0.7442	0.7018	0.6549	0.5966	0.548	0.485	0.4258	0.4047	0.3923	0.3919	0.3812	0.3604
275	HtMa / HtMi	young	r	C3A2	335.667	20.8696	41.9575	62.5	85.0446	92.3754	66.7851	37.259	22.8377	15.8428	11.8874	9.2794	7.3675	6.2112	5.2246	4.4709	3.7616	3.2706	2.7742	2.3652	2.1262	1.944	1.733	1.5739	1.4409	1.3748	1.2807	1.2195	1.1983	1.1175	1.0682	1.0218	0.9535	0.8884	0.7779	0.689	0.597	0.5356	0.4857	0.4608	0.4296	0.4013	0.3976	0.3835	0.37
278	HtMa / HtMa	young	b	C3A2	309	12.3305	24.7741	36.6698	40.4989	30.4022	18.0322	10.7138	7.4381	5.5659	4.3792	3.5499	2.9421	2.5985	2.1681	1.929	1.742	1.496	1.3417	1.2208	1.1013	0.9964	0.8893	0.8278	0.7675	0.7358	0.7071	0.6712	0.6433	0.6023	0.5559	0.5066	0.4562	0.439	0.3935	0.3401	0.3041	0.2724	0.2488	0.2384	0.234	0.2403	0.2401	0.232	0.2314
278	HtMa / HtMa	young	r	C3A2	350.333	17.9479	33.9096	50.1647	58.9892	47.6176	31.0727	19.7013	13.0567	9.4242	7.1495	5.7501	4.9183	4.0785	3.3579	2.9588	2.605	2.2649	1.9108	1.6945	1.5032	1.3687	1.2407	1.1267	1.0705	1.0112	0.9389	0.882	0.8297	0.7421	0.6679	0.5978	0.5272	0.4711	0.4126	0.3705	0.337	0.3254	0.3224	0.3312	0.3324	0.3324	0.3423	0.3407	0.3226
280	HtMi / HtMi	young	b	C3A2	304	34.7443	62.3437	58.2493	43.1373	37.811	31.0852	23.3329	18.4589	14.6998	11.9585	9.5248	8.0547	6.586	5.5271	4.7704	3.898	3.2149	2.665	2.3466	2.1814	1.9743	1.7609	1.5625	1.3745	1.2783	1.1737	1.1168	1.0169	0.9319	0.8798	0.8196	0.7248	0.6694	0.6126	0.5629	0.5362	0.5016	0.48	0.4546	0.4409	0.4289	0.4085	0.3912	0.3804
280	HtMi / HtMi	young	r	C3A2	346.667	33.1067	62.1134	67.53	59.375	52.0864	44.5388	37.9639	30.1456	23.2581	17.6015	14.2156	11.59	9.0205	7.3879	6.1624	4.9745	4.0201	3.3817	2.9297	2.5818	2.3011	2.0474	1.8239	1.6539	1.5533	1.4901	1.3746	1.2883	1.2501	1.1238	1.0132	0.9226	0.8337	0.7634	0.6824	0.6241	0.5865	0.5587	0.5271	0.5052	0.4856	0.4731	0.4721	0.4663
305	HtMa / HtMi	young	b	C3A2	317.333	18.9286	54.7345	70.0413	82.7343	66.9364	42.3807	26.4381	17.4523	12.7798	10.7834	9.0101	7.0187	5.6693	4.9212	4.0311	3.3093	2.7439	2.4565	2.2361	2.0247	1.8585	1.6986	1.6135	1.5519	1.4992	1.4224	1.3607	1.3096	1.3057	1.3168	1.2918	1.3038	1.3254	1.3364	1.3559	1.34	1.3208	1.2311	1.0935	0.9547	0.8749	0.8153	0.731	0.6989
305	HtMa / HtMi	young	r	C3A2	384.333	21.2768	60.2245	79.4789	103.156	92.2236	63.996	39.6797	27.1959	19.7443	15.6153	12.9197	10.6101	8.4712	6.7009	5.5541	4.5375	3.7483	3.1625	2.8706	2.6352	2.3765	2.204	2.0842	1.9456	1.838	1.8183	1.7413	1.7178	1.7321	1.6532	1.6567	1.6479	1.6408	1.6251	1.5942	1.5265	1.3786	1.2501	1.1536	1.0148	0.9194	0.866	0.8135	0.7685
310	HtMa / HtMa	young	b	C3A2	325.667	48.6369	105.804	96.5453	104.462	82.4188	50.6264	31.2861	20.9243	15.374	12.0114	9.9614	8.5029	7.1184	5.8272	5.0448	4.3314	3.7607	3.3201	2.945	2.6201	2.4764	2.3385	2.1975	2.0966	2.0558	1.9632	2.0027	2.0532	2.1468	2.2794	2.343	2.266	2.0809	1.9182	1.7916	1.5801	1.421	1.2557	1.1305	1.0047	0.9013	0.8262	0.7674	0.6977
310	HtMa / HtMa	young	r	C3A2	351.333	255.353	430.873	173.428	125.06	101.66	69.7394	43.987	29.8154	22.3401	17.8079	14.1312	11.2698	9.1944	7.8138	6.503	5.4268	4.562	3.979	3.5961	3.2515	2.9902	2.8884	2.6928	2.4788	2.4737	2.4484	2.3612	2.2976	2.3712	2.4089	2.5275	2.5809	2.3249	2.0256	1.7355	1.5239	1.343	1.131	0.977	0.8786	0.8001	0.7214	0.6616	0.623
320	HtMa / HtMa	young	b	C3A2	333	22.1394	64.503	76.662	75.6757	61.1152	42.8314	28.6147	20.3212	15.728	13.0698	11.345	9.5525	7.8475	6.9528	6.2171	5.2112	4.5011	3.9461	3.5055	3.2708	3.0525	2.8371	2.7124	2.5465	2.3775	2.2043	2.0395	1.8069	1.5971	1.4865	1.3717	1.2481	1.0978	0.98	0.9041	0.8419	0.7666	0.7405	0.6954	0.6747	0.6819	0.6841	0.6848	0.6439
320	HtMa / HtMa	young	r	C3A2	363.667	26.1549	70.8385	84.1729	79.9933	63.3502	50.0586	35.3405	24.2311	18.8749	15.5055	12.7737	10.3311	8.5925	7.2783	6.3253	5.3136	4.5611	4.0973	3.7055	3.1825	2.9536	2.8205	2.5795	2.4664	2.2829	2.0813	1.9534	1.7674	1.6662	1.5282	1.3728	1.2462	1.0934	0.9721	0.888	0.8265	0.7815	0.7447	0.7475	0.7596	0.7954	0.8469	0.8494	0.7486
326	HtMa / HtMa	young	b	C3A2	301.667	51.2928	101.83	67.1958	54.9198	42.1322	31.5367	23.1704	17.3518	13.9551	11.8139	10.2093	9.0865	8	7.1507	6.3909	5.5743	5.0466	4.5587	3.9701	3.4707	3.1207	2.8401	2.6275	2.4084	2.1111	1.9793	1.8711	1.7872	1.7279	1.6433	1.586	1.545	1.4893	1.4071	1.3923	1.3921	1.4119	1.3685	1.3542	1.3957	1.4135	1.426	1.4423	1.4159
326	HtMa / HtMa	young	r	C3A2	335.667	30.3633	70.3359	66.6374	63.455	54.1062	40.7895	28.9408	22.7436	19.2042	16.644	13.8043	12.0763	10.7259	9.0611	7.7875	6.4856	5.5515	4.8351	4.1881	3.7651	3.3486	3.014	2.7712	2.5469	2.304	2.145	1.9612	1.8227	1.7845	1.7185	1.7023	1.6906	1.7073	1.6785	1.5965	1.5667	1.5396	1.5118	1.4308	1.4174	1.4618	1.4045	1.4437	1.4909
343	HtMa / HtMi	young	b	C3A2	349	13.5841	33.3733	35.4727	37.1336	28.8789	19.4348	13.4685	10.1615	8.0881	7.0021	5.8012	4.7791	4.0081	3.3321	2.7108	2.2113	1.749	1.468	1.319	1.1399	1.0413	0.9413	0.848	0.7863	0.725	0.6609	0.6178	0.575	0.5468	0.4993	0.4782	0.4513	0.4192	0.4056	0.3965	0.3933	0.3994	0.4165	0.4067	0.4167	0.4206	0.4219	0.4124	0.3889
343	HtMa / HtMi	young	r	C3A2	375.667	19.4513	45.492	46.5985	54.0178	47.6674	32.9314	22.6003	16.7487	13.8639	11.7445	9.3622	7.4991	5.95	4.8748	3.8588	3.089	2.4605	2.0249	1.7387	1.5981	1.418	1.2646	1.1676	1.0792	0.9983	0.9351	0.8522	0.7861	0.7403	0.6767	0.5948	0.5482	0.5013	0.4656	0.4517	0.4464	0.4436	0.4409	0.4607	0.4699	0.4734	0.48	0.4607	0.4342
348	HtMa / HtMi	young	b	C3A2	288	22.7398	66.3699	98.9961	100.727	65.79	38.0803	23.9847	17.5498	13.3087	10.7191	9.1067	7.4858	6.2655	5.4884	4.6992	3.9872	3.3892	2.989	2.8032	2.712	2.6392	2.593	2.4945	2.3136	2.2717	2.2375	2.1777	2.1557	2.093	2.051	1.9752	1.8888	1.7501	1.6953	1.5265	1.4099	1.3136	1.2029	1.0802	1.0317	1.0446	1.0689	1.1069	1.0853
348	HtMa / HtMi	young	r	C3A2	374.333	22.1476	68.196	108.969	128.474	88.8436	49.1445	30.0887	21.3532	16.1668	12.747	11.1879	9.492	7.7334	6.2681	5.3533	4.5964	4.0844	3.5857	3.4127	3.3873	3.354	3.2257	3.0563	2.939	2.8657	2.7607	2.7358	2.6854	2.6319	2.6209	2.5509	2.3358	2.0688	1.8569	1.6833	1.5793	1.42	1.2879	1.2737	1.3278	1.3756	1.6109	1.7733	1.5396
373	HtMa / HtMa	young	b	C3A2	343.667	16.5397	39.5717	39.7561	50.0593	52.8337	38.0465	23.2591	15.5011	11.4174	8.7138	7.1213	6.2038	5.5272	4.9676	4.5118	3.9814	3.3558	3.0713	2.7551	2.4565	2.3086	2.1262	2.0428	1.9825	2.0087	2.0452	2.1011	2.1252	2.0307	1.8624	1.6505	1.4871	1.3467	1.2301	1.0795	0.9704	0.9132	0.8164	0.7578	0.7175	0.6799	0.6267	0.6021	0.6087
373	HtMa / HtMa	young	r	C3A2	373.333	19.036	47.0413	46.57	56.1595	72.1101	72.3924	43.7072	24.4195	16.3009	12.7467	10.4557	8.3248	7.2707	6.5179	5.7965	5.0251	4.1657	3.6084	3.1712	2.9355	2.7013	2.5477	2.3734	2.2215	2.1658	2.1839	2.1587	2.1928	2.1877	2.0951	1.9367	1.6881	1.55	1.3797	1.2132	1.1028	1.0146	0.9734	0.9219	0.8382	0.7458	0.6798	0.6415	0.6328
397	HtMa / HtMa	young	b	C3A2	321.667	19.9915	51.6065	65.7693	74.1765	58.5547	37.5451	24.0698	16.3383	12.0548	9.8209	8.5626	7.7631	7.2156	6.5514	5.6348	4.8879	4.2567	3.5524	3.0342	2.6221	2.3343	2.1101	1.9255	1.7339	1.5736	1.494	1.4349	1.4056	1.4089	1.4755	1.5618	1.5983	1.6704	1.8276	1.9382	1.9519	1.8976	1.82	1.7446	1.584	1.3533	1.1537	1.0016	0.8498
397	HtMa / HtMa	young	r	C3A2	367.667	23.3652	56.8612	76.2541	87.3164	66.6616	42.6507	27.0338	18.0838	13.5044	11.0638	9.4735	8.1733	7.529	6.5746	5.4149	4.5907	3.8131	3.2292	2.6672	2.393	2.1488	1.9181	1.7491	1.623	1.518	1.4221	1.3619	1.3375	1.354	1.3913	1.45	1.5258	1.6595	1.8738	1.9674	2.0409	2.1174	2.1631	2.0949	1.8587	1.6227	1.3071	0.9697	0.7521
412	HtMa / HtMa	young	b	C3A2	335.667	32.2388	80.5961	67.6074	58.6763	48.4631	33.5345	23.9201	17.797	14.5063	12.7746	10.9757	9.7357	8.9837	7.9841	7.0226	6.065	5.3037	4.6995	4.3008	3.8903	3.6271	3.4803	3.3335	3.3017	3.218	3.1711	3.1004	2.9815	2.7752	2.488	2.1735	1.9236	1.6333	1.4274	1.2908	1.1205	0.9831	0.8752	0.792	0.7054	0.6519	0.5866	0.5426	0.5246
412	HtMa / HtMa	young	r	C3A2	379	40.2418	85.1656	63.0961	58.05	50.7669	38.9906	29.9021	22.0447	18.4047	15.7327	13.4259	11.4907	9.8339	8.5722	7.4204	6.4952	5.8464	4.9995	4.6358	4.5135	4.2718	4.03	3.8996	4.0586	4.1683	4.0078	3.7711	3.5776	3.1371	2.725	2.3657	2.021	1.7203	1.4574	1.2936	1.1367	0.975	0.85	0.7653	0.7156	0.6364	0.5753	0.5274	0.4841
426	HtMa / HtMi	young	b	C3A2	341.667	32.0002	75.8549	73.3403	82.5175	67.1004	43.262	28.4167	18.6874	12.755	10.1116	8.3939	7.0065	5.8144	5.466	4.9855	4.3542	3.943	3.6064	3.2811	2.9939	2.8414	2.6736	2.4792	2.3577	2.264	2.1388	2.0591	2.0734	2.1001	2.1628	2.1931	2.1746	2.0808	1.9057	1.7744	1.631	1.4465	1.3133	1.2094	1.0909	0.9925	0.8998	0.79	0.7113
426	HtMa / HtMi	young	r	C3A2	346.667	40.2532	100.969	109.781	127.903	115.419	81.7468	53.5589	35.0748	23.4867	17.5516	13.6311	11.0886	9.3392	8.1848	7.1515	6.1467	5.286	4.6096	4.1827	3.8381	3.492	3.2481	3.0241	2.9583	2.7656	2.7117	2.6675	2.7088	2.7945	2.9917	3.1351	3.1611	2.9636	2.5967	2.3373	2.1092	1.7894	1.525	1.3787	1.2432	1.0992	0.9836	0.8762	0.7474
435	HtMa / HtMa	young	b	C3A2	323	27.6945	80.2724	106.963	140.378	133.929	90.0836	51.2857	33.1491	24.3411	17.4053	13.1658	10.2601	8.4646	7.2425	6.2049	5.2291	4.3587	3.9499	3.558	3.3611	3.0847	2.8617	2.7661	2.6945	2.8023	2.9767	3.0672	3.2199	3.4646	3.576	3.5887	3.6263	3.5942	3.3837	3.0794	2.775	2.6394	2.5087	2.2725	2.0586	1.7939	1.4991	1.2714	1.0854
435	HtMa / HtMa	young	r	C3A2	359.667	35.6226	103.623	139.251	184.347	202.946	165.064	103.746	59.5066	39.2383	29.6548	23.6096	17.8448	13.8478	10.9709	9.1996	7.6636	6.6087	5.86	5.1817	4.5153	4.1136	3.9384	3.9602	3.7319	3.6649	3.8512	3.9651	4.2598	4.5334	4.6075	4.6865	4.5213	4.1942	3.9173	3.7016	3.6861	3.7196	3.6173	3.7209	3.6764	3.0438	2.2636	1.6731	1.318
455	HtMa / HtMa	young	b	C3A2	295.667	27.534	68.2858	89.4203	100.635	69.6353	38.1259	23.1393	15.5811	11.4702	9.0165	7.2007	5.9435	4.988	4.1938	3.6034	3.1523	2.6534	2.3195	2.1028	1.9057	1.7446	1.7045	1.6437	1.5204	1.5039	1.4638	1.4402	1.4129	1.3196	1.2265	1.1769	1.0685	0.9861	0.9229	0.8717	0.8329	0.8143	0.7989	0.793	0.7834	0.7773	0.7992	0.8021	0.7647
455	HtMa / HtMa	young	r	C3A2	355.667	49.0264	110.231	124.639	130.513	95.4846	58.379	37.6142	25.8418	19.481	15.2437	12.5721	10.3424	8.4262	6.9997	5.8515	4.7559	4.0813	3.5615	3.1827	2.9917	2.7007	2.4424	2.3157	2.2124	2.0931	1.9917	1.9426	1.8605	1.8111	1.7027	1.5759	1.4725	1.3486	1.2301	1.1746	1.1457	1.0738	1.0253	0.9925	0.9968	1.0742	1.1409	1.1516	1.0298
462	HtMa / HtMa	young	b	C3A2	348.667	34.4551	90.854	95.3062	107.063	102.962	74.7471	41.8828	24.1251	17.1551	13.254	10.9443	9.0034	7.3296	6.4017	5.5411	4.9583	4.2196	3.762	3.4421	3.1314	2.932	2.8399	2.7618	2.7742	2.817	2.8857	2.951	2.9692	3.0699	3.0914	2.9805	2.6764	2.4173	2.0932	1.7494	1.4962	1.2813	1.0513	0.8403	0.6797	0.5651	0.4907	0.4196	0.3688
462	HtMa / HtMa	young	r	C3A2	379	34.7585	91.8481	110.043	131.05	119.915	90.3676	57.3857	30.816	21.0463	16.0756	12.9172	10.694	9.0112	7.6236	6.2547	5.3092	4.4926	3.9902	3.5754	3.2854	3.0427	2.9153	2.8092	2.7461	2.7307	2.9425	2.9892	2.9636	2.9557	2.9778	2.7708	2.5083	2.228	1.9602	1.6495	1.3955	1.1688	0.9942	0.7984	0.6174	0.5072	0.425	0.3556	0.3224
464	HtMa / HtMa	young	b	C3A2	300.667	36.4678	71.3368	62.6254	53.6485	37.7937	25.0266	16.4794	12.0885	9.7288	8.4916	7.5874	6.8064	6.0115	5.3649	4.7497	3.8998	3.413	2.8368	2.4209	2.1322	1.8395	1.6445	1.4492	1.2996	1.1975	1.102	1.0149	0.9519	0.8921	0.8569	0.779	0.7051	0.674	0.6292	0.592	0.5663	0.5232	0.459	0.4169	0.3934	0.3677	0.335	0.3306	0.3214
464	HtMa / HtMa	young	r	C3A2	357	40.2669	94.1785	80.6736	67.0819	48.8366	35.6871	25.1395	18.988	15.6998	13.1558	11.7444	10.135	9.0908	7.6833	6.356	5.3058	4.3518	3.7212	3.1755	2.7253	2.4298	2.1946	1.9729	1.7834	1.601	1.4803	1.3725	1.2201	1.0961	1.0284	0.9528	0.8714	0.8154	0.7614	0.7171	0.6575	0.6092	0.5735	0.5267	0.4803	0.4483	0.4279	0.4038	0.3851
490	HtMa / HtMa	young	b	C3A2	298.667	91.2816	166.826	82.7689	84.924	95.0002	70.4099	37.6397	24.2388	17.2046	13.7093	11.5884	9.5027	8.1401	6.8923	5.7444	4.8271	4.0119	3.4976	3.0753	2.6749	2.3376	2.1323	1.9221	1.8066	1.6556	1.4857	1.4064	1.3458	1.2353	1.0955	1.0486	0.9601	0.9031	0.8553	0.8197	0.7836	0.7432	0.6618	0.6866	0.7261	0.7442	0.7986	0.8241	0.8084
490	HtMa / HtMa	young	r	C3A2	358.333	30.0173	66.8771	64.0426	88.0345	108.267	85.7654	49.7089	30.3957	22.2881	17.9652	14.9508	12.2194	10.2543	8.371	6.8524	5.7732	4.5894	3.8395	3.4265	3.0392	2.7325	2.538	2.3107	2.121	1.9565	1.8508	1.7246	1.5803	1.4462	1.2839	1.1551	1.0449	0.964	0.9057	0.8458	0.8397	0.8498	0.9065	1.0089	1.1617	1.3024	1.2712	1.1016	0.9419
495	HtMa / HtMa	young	b	C3A2	294	31.6365	67.2923	75.2469	75.181	53.2215	31.671	19.3923	12.1325	8.4563	6.9104	5.917	4.9986	4.2788	3.9338	3.5756	3.0173	2.6232	2.288	1.9705	1.7543	1.6004	1.4518	1.3926	1.3278	1.3101	1.3629	1.3477	1.3775	1.241	1.0034	0.7975	0.609	0.4912	0.4133	0.3575	0.3108	0.2872	0.2646	0.2376	0.2214	0.2063	0.1976	0.1957	0.1909
495	HtMa / HtMa	young	r	C3A2	327.667	31.3052	69.3312	80.5766	79.6154	59.791	37.99	23.051	15.1484	11.2172	9.3637	7.9325	6.5406	5.55	5.0204	4.2684	3.7037	3.1431	2.7048	2.4186	2.1883	1.9262	1.777	1.6685	1.6086	1.5857	1.6364	1.752	1.7021	1.4558	1.1339	0.8646	0.7032	0.5895	0.489	0.4039	0.3647	0.3318	0.3064	0.2851	0.2715	0.2617	0.2467	0.2294	0.2237
507	HtMa / HtMa	young	b	C3A2	305.667	37.0432	92.1509	103.033	116.868	101.813	60.4445	29.8821	17.9709	13.0591	10.2696	8.169	6.6624	5.866	4.959	4.0841	3.3656	2.8358	2.3371	1.9762	1.7292	1.5239	1.3754	1.2714	1.1536	1.0955	1.0182	0.9636	0.9153	0.8519	0.8075	0.7386	0.6923	0.6738	0.6217	0.5913	0.5745	0.5461	0.5039	0.4569	0.4265	0.4071	0.4142	0.399	0.3795
507	HtMa / HtMa	young	r	C3A2	379.667	69.9461	157.637	157.292	155.903	135.89	91.316	53.6237	31.5637	22.0612	16.9748	13.4997	10.947	9.0032	7.5815	6.412	5.2337	4.2214	3.4898	2.98	2.5473	2.3661	2.1415	1.9262	1.7729	1.6757	1.5766	1.4761	1.3828	1.3555	1.3328	1.2049	1.1042	1	0.9032	0.8352	0.7665	0.7095	0.6572	0.6151	0.5662	0.5561	0.5294	0.4934	0.4747
604	HtMa / HtMa	young	b	C3A2	373.667	66.6346	173.261	188.843	168.5	120.31	76.0501	49.0908	31.9154	22.0496	16.8035	13.3844	10.6807	8.67961	7.32656	6.32121	5.47646	4.75445	4.14477	3.74283	3.37287	3.08319	2.89668	2.77141	2.73023	2.68102	2.59239	2.56921	2.59179	2.59836	2.66993	2.73905	2.69712	2.58762	2.41157	2.19584	2.02722	1.85866	1.63719	1.47435	1.31795	1.14078	0.995176	0.90803	0.851726
604	HtMa / HtMa	young	r	C3A2	424	80.1124	226.048	268.102	262.241	215.576	150.245	94.9948	63.8117	44.4836	32.4265	25.4624	21.1739	16.959	13.6647	11.7517	9.72523	8.17147	6.99037	6.04923	5.41751	4.83393	4.25402	3.91111	3.72821	3.50994	3.47216	3.43321	3.31055	3.31436	3.30902	3.13545	2.94985	2.81709	2.77588	2.71519	2.62543	2.57632	2.63572	2.73338	2.75994	2.69215	2.2475	1.77501	1.44245
605	HtMa / HtMa	young	b	C3A2	286	35.1399	85.0159	81.358	83.3105	57.8895	37.1963	25.229	18.1051	13.8452	11.4051	9.32395	7.70371	6.6558	5.3889	4.33012	3.69233	3.2181	2.80931	2.5781	2.33884	2.19079	2.11203	2.10136	2.05116	1.9893	1.99067	1.9333	1.95299	1.99159	2.07491	2.18022	2.25165	2.23254	2.1752	2.03845	1.88191	1.7869	1.59661	1.45345	1.3693	1.21815	1.11944	1.06341	1.00577
605	HtMa / HtMa	young	r	C3A2	359.333	59.1153	131.069	113.868	112.228	86.0796	56.9246	36.61	25.9239	19.4491	15.9184	12.9569	10.5003	8.32722	6.67575	5.3629	4.43302	3.83796	3.36977	3.03529	2.73464	2.61698	2.47856	2.36157	2.28665	2.22587	2.18575	2.231	2.30675	2.39939	2.60016	2.82944	2.99571	3.08603	3.16446	2.84315	2.49919	2.16322	1.80759	1.57688	1.36176	1.14472	0.997241	0.914956	0.866962
607	HtMa / HtMa	young	b	C3A2	304	29.902	68.1397	74.3875	80.5749	69.2628	53.6414	35.6123	22.1106	14.6386	11.3553	9.40156	7.81988	6.57204	5.57442	4.80507	3.87972	3.20996	2.72898	2.33884	2.06871	1.84502	1.61547	1.48149	1.41612	1.33414	1.23424	1.12772	1.07325	1.02447	1.00624	0.995864	0.968501	0.924485	0.843335	0.773215	0.75544	0.73536	0.72061	0.723602	0.739435	0.740457	0.822053	0.941673	1.11789
607	HtMa / HtMa	young	r	C3A2	336	53.2476	103.157	92.2147	95.8959	93.0251	77.1792	48.1172	29.0871	19.2486	14.1971	11.7652	9.57856	7.82708	6.35331	5.31986	4.30923	3.59005	3.05422	2.63633	2.29509	2.00586	1.87456	1.70726	1.60953	1.49934	1.4171	1.31978	1.25574	1.19757	1.17706	1.14104	1.10332	1.01578	0.964273	0.897222	0.867361	0.865566	0.859409	0.889201	0.930251	1.01158	1.17085	1.46926	1.85183
608	HtMa / HtMi	young	b	C3A2	313.667	249.287	408.413	199.434	142.037	90.7403	54.5255	35.2614	23.9994	17.9804	13.406	10.311	8.28133	7.09414	5.94019	5.12507	4.18697	3.75405	3.38221	3.01093	2.76058	2.4485	2.18978	2.06538	1.95794	1.79804	1.6734	1.59074	1.50765	1.37753	1.31704	1.28944	1.25199	1.19895	1.16574	1.21787	1.24337	1.32831	1.44411	1.64248	1.91073	2.04362	2.18273	2.14437	1.84332
608	HtMa / HtMi	young	r	C3A2	368.333	74.0116	151.53	154.703	164.93	127.85	87.8011	58.7625	40.439	28.4119	20.4739	15.2475	11.8413	9.81974	8.09469	6.81868	5.62082	4.90343	4.32315	3.79228	3.27869	2.85299	2.56448	2.29826	2.09267	1.99113	1.86767	1.76198	1.6512	1.5531	1.43384	1.39798	1.33629	1.27468	1.27556	1.30467	1.35863	1.46555	1.6615	1.88062	2.44512	3.45541	4.32514	4.14763	3.1798
609	HtMa / HtMa	young	b	C3A2	355	24.8428	56.4807	55.0427	56.079	45.0817	32.0258	20.6016	15.4028	12.543	10.5487	9.07403	7.70726	6.50579	5.56673	4.77749	4.05415	3.33273	2.88337	2.56153	2.31526	2.09894	1.93731	1.78197	1.63042	1.5237	1.43979	1.3326	1.22942	1.15904	1.06537	0.965828	0.883487	0.773571	0.677954	0.624453	0.556929	0.492947	0.454465	0.438834	0.413143	0.407005	0.417734	0.433212	0.459621
609	HtMa / HtMa	young	r	C3A2	368.667	32.9079	72.3769	68.1711	71.4496	66.359	48.7528	30.8035	21.5526	16.9044	13.6804	11.2824	9.34545	7.9378	6.42984	5.19876	4.22474	3.67029	3.32047	2.83531	2.58345	2.33991	2.10911	1.94312	1.85439	1.79432	1.64097	1.6278	1.63418	1.57797	1.40832	1.23595	1.13032	0.986961	0.880035	0.805008	0.717464	0.64506	0.613479	0.579029	0.533949	0.516179	0.532476	0.611787	0.688335
610	HtMa / HtMa	young	b	C3A2	302	44.5041	98.2879	100.531	105.609	81.7711	48.4284	29.7167	20.4268	15.2405	12.1171	10.2306	8.73373	7.76605	6.57506	5.46764	4.40656	3.66944	3.26663	2.93224	2.66686	2.45076	2.30515	2.11592	1.88191	1.79102	1.70608	1.63983	1.63343	1.62106	1.55346	1.51565	1.42037	1.30647	1.17058	1.00023	0.889406	0.789769	0.711541	0.646845	0.593472	0.549414	0.506058	0.474788	0.476212
610	HtMa / HtMa	young	r	C3A2	348.333	46.4515	110.688	137.025	149.005	120.143	70.4693	40.0959	28.4512	21.6521	16.6571	13.5363	11.5585	9.61834	7.56136	6.3944	5.37032	4.58987	4.08225	3.63999	3.19154	2.95597	2.81644	2.61457	2.39442	2.25944	2.13845	2.07826	2.05305	2.054	1.96517	1.84672	1.64286	1.41742	1.24509	1.09749	0.966941	0.83888	0.783971	0.709578	0.667882	0.63797	0.585599	0.576766	0.597998
611	HtMa / HtMa	young	b	C3A2	288	67.9204	136.395	107.029	103.062	86.9361	58.2908	36.0994	24.2661	18.7025	14.6859	11.6896	9.80844	8.46447	7.47309	6.6973	5.6273	4.70977	4.07662	3.58261	3.17687	2.77332	2.45697	2.29562	2.1747	1.95975	1.90941	1.80468	1.6684	1.63832	1.59074	1.46555	1.36333	1.27556	1.16493	1.07746	0.998619	0.919814	0.871565	0.821486	0.796343	0.777141	0.798914	0.819974	0.87579
611	HtMa / HtMa	young	r	C3A2	328.333	118.005	209.363	136.364	137.784	121.619	95.9622	61.052	38.9762	26.418	19.2309	15.5274	12.9479	10.9749	9.36699	7.94511	6.66653	5.76766	4.87865	4.02532	3.55386	3.15355	2.85299	2.66809	2.49689	2.37794	2.31153	2.10523	1.9893	1.93508	1.83992	1.70608	1.56135	1.45579	1.40929	1.2942	1.19757	1.1516	1.09926	1.0937	1.10841	1.11224	1.17193	1.19647	1.16466
612	HtMa / HtMa	young	b	C3A2	343.667	23.4423	67.4683	83.3873	82.5468	55.9887	31.7834	19.2975	13.2648	9.98619	7.96893	6.60085	5.62341	4.83281	4.05695	3.49704	2.95801	2.60375	2.38946	2.11057	1.88408	1.75833	1.6734	1.5481	1.45579	1.43219	1.41156	1.36176	1.35957	1.2933	1.20698	1.12538	1.05172	0.978814	0.87579	0.804822	0.780549	0.730971	0.694225	0.669422	0.633286	0.589929	0.553605	0.517965	0.477639
612	HtMa / HtMa	young	r	C3A2	338	32.8549	75.145	87.8416	89.1046	74.5247	50.1765	28.2163	18.1092	13.8548	11.3527	9.39074	7.85778	6.46249	5.28202	4.60787	4.03367	3.43795	3.05	2.74221	2.42438	2.20597	2.01372	1.92221	1.88973	1.79432	1.72544	1.74301	1.72624	1.65806	1.59258	1.45312	1.30467	1.16439	1.05536	0.987416	0.919602	0.851922	0.797076	0.759102	0.694065	0.629361	0.57544	0.555648	0.520715
613	HtMa / HtMi	young	b	C3A2	285.667	163.795	288.403	152.335	102.825	72.2936	52.9541	37.9315	25.0957	18.3527	14.9073	12.7233	11.8195	10.6709	9.61612	8.31764	7.15814	6.08275	5.21675	4.45964	4.0059	3.6425	3.322	3.05774	2.97577	2.9363	2.89001	2.82813	2.77779	2.69836	2.56567	2.55976	2.57988	2.51246	2.39332	2.23769	2.15229	2.18273	1.98016	1.90985	1.9147	1.92708	1.92088	2.06871	2.28823
613	HtMa / HtMi	young	r	C3A2	332.667	79.0679	163.644	141.449	115.718	83.8494	59.3335	40.411	28.8403	21.3501	18.0842	15.8599	14.0088	12.6619	10.9446	9.48855	8.2319	6.6512	5.5847	4.93742	4.4792	4.09921	3.74455	3.51075	3.44588	3.32506	3.23817	3.15428	3.06973	3.10027	3.04649	3.05211	3.02622	2.91206	2.7842	2.60856	2.44906	2.29087	2.25009	2.2182	2.21004	2.38287	2.75677	3.31207	3.57355
614	HtMi / HtMi	young	b	C3A2	285.333	47.9623	109.623	90.0741	85.0942	74.0116	53.1741	37.853	24.8828	17.9763	14.3714	11.3292	9.53016	8.00571	6.62369	5.40381	4.65693	3.88419	3.25537	2.67732	2.31846	2.02862	1.82894	1.64248	1.46218	1.32709	1.24366	1.16065	1.07078	0.990604	0.908866	0.824328	0.747997	0.685646	0.612209	0.560015	0.512861	0.479733	0.435311	0.410771	0.388687	0.377311	0.357026	0.323817	0.310242
614	HtMi / HtMi	young	r	C3A2	343	48.5177	104.496	107.424	123.112	111.199	84.8008	59.8687	43.013	32.0479	24.8085	18.9889	15.3003	12.0337	9.50386	7.50931	5.84925	4.85959	4.02995	3.38688	2.87872	2.44794	2.18827	1.95569	1.79349	1.65691	1.52195	1.37088	1.27703	1.20282	1.06488	0.940806	0.84879	0.747825	0.657658	0.596074	0.551315	0.490569	0.441062	0.409355	0.360994	0.331665	0.305703	0.280285	0.272145
615	HtMa / HtMi	young	b	C3A2	329	105.73	194.402	119.702	99.1745	68.786	41.9179	25.5329	17.1277	12.6794	10.3039	8.8247	8.05564	7.4131	6.70039	6.07156	5.4752	4.7687	4.06069	3.51075	3.12752	2.79576	2.48028	2.24182	2.11106	1.96517	1.87543	1.73181	1.60251	1.52897	1.35957	1.21032	1.08818	0.956093	0.847423	0.740116	0.681083	0.621441	0.603254	0.572796	0.531618	0.487192	0.465801	0.43132	0.411718
615	HtMa / HtMi	young	r	C3A2	333.667	52.3721	111.199	109.144	111.686	85.0159	55.4626	35.1237	23.9994	17.7664	14.6622	12.368	10.4665	9.0803	8.36951	7.41652	6.45952	5.58085	4.81282	4.16102	3.69063	3.26814	2.93697	2.79383	2.58702	2.52464	2.49459	2.37137	2.23666	2.09508	1.85353	1.65348	1.44977	1.228	1.0985	0.983105	0.887565	0.848008	0.847618	0.882877	0.946673	0.849767	0.660389	0.548782	0.463874
616	HtMa / HtMi	young	b	C3A2	321	39.7649	95.6533	107.547	117.978	96.7832	64.8336	39.2735	25.4097	17.1317	12.8914	10.6955	8.8369	6.95184	5.55265	4.77309	4.2335	3.6358	3.14557	2.86088	2.67424	2.4649	2.28718	2.15377	2.18072	2.11057	1.98153	1.86209	1.75954	1.60325	1.44145	1.30918	1.20976	1.10764	1.03944	0.987188	0.962498	0.954553	1.00995	1.07152	1.10433	1.28322	1.61102	1.80551	1.78896
616	HtMa / HtMi	young	r	C3A2	377.333	44.7095	97.9264	98.9464	112.383	102.754	80.5564	53.2721	32.419	22.5788	17.0412	13.3814	10.8968	8.7963	7.00648	5.813	4.85177	4.23448	3.63245	3.15065	2.91206	2.70645	2.47002	2.30144	2.17921	2.09942	2.04127	1.93731	1.81134	1.64702	1.5021	1.36207	1.27321	1.19784	1.14314	1.08318	1.05901	1.02731	1.02518	1.07053	1.22744	1.42594	1.72028	2.25424	2.70458
619	HtMa / HtMi	young	b	C3A2	325.667	34.1743	81.3767	103.205	118.823	95.3894	57.5307	30.9314	19.0985	13.555	10.5974	8.61986	7.1978	6.2044	5.39883	4.79733	3.99853	3.37443	2.88935	2.5787	2.37083	2.1722	2.09122	1.99986	1.9756	1.82726	1.72425	1.71514	1.64665	1.55167	1.52651	1.50245	1.46589	1.42004	1.26532	1.14789	1.0067	0.931537	0.86457	0.80891	0.738924	0.658567	0.610661	0.549794	0.494994
619	HtMa / HtMi	young	r	C3A2	362	39.7466	98.3332	130.587	160.583	148.662	105.027	56.4157	33.0826	22.4957	17.002	13.4958	10.9547	9.15377	7.48859	6.10801	5.10505	4.31817	3.7051	3.29913	2.98538	2.86352	2.70147	2.58583	2.47172	2.36265	2.21055	2.18726	2.18776	2.19483	2.18323	2.2413	2.20597	2.13501	1.95029	1.77992	1.56964	1.47877	1.32954	1.13684	0.981974	0.888792	0.757356	0.622444	0.537032
621	HtMa / HtMi	young	b	C3A2	296.667	137.183	241.88	135.114	127.585	112.383	75.3356	47.687	33.5197	24.5471	17.8525	13.4246	11.1096	8.84912	7.45075	6.2431	5.35427	4.42996	3.95822	3.43637	3.06337	2.89135	2.70583	2.65889	2.73464	3.01856	3.45303	3.76791	4.17254	4.41774	4.68813	4.5772	4.57615	4.25207	3.74628	3.3752	2.94713	2.63087	2.34045	2.21208	1.93598	1.68267	1.51915	1.37025	1.30497
621	HtMa / HtMi	young	r	C3A2	374	46.3234	110.994	126.038	158.161	156.171	118.577	76.542	46.5372	32.4489	25.0669	20.1048	15.8489	12.471	9.7051	7.85778	6.37089	5.35797	4.52168	3.89942	3.44667	3.14051	3.01162	2.96278	3.00123	3.06337	3.19742	3.38454	3.76097	4.08037	4.50921	4.67843	4.66122	4.24033	3.83972	3.43479	3.11028	2.8721	2.72333	2.60976	2.28718	1.95119	1.65844	1.43847	1.33107
622	HtMa / HtMi	young	b	C3A2	287.667	52.0355	101.906	88.1455	93.6052	69.9681	40.3088	21.4734	14.067	10.2094	7.81088	6.13197	4.85512	4.0439	3.3512	2.91608	2.43164	2.08065	1.80219	1.56747	1.41026	1.26241	1.1463	1.07622	1.02612	0.975888	0.897429	0.83618	0.784152	0.755266	0.713839	0.680613	0.625461	0.606038	0.589386	0.554881	0.506757	0.486743	0.455407	0.41889	0.372649	0.345144	0.330902	0.310384	0.289201
622	HtMa / HtMi	young	r	C3A2	318.667	55.2332	117.112	119.015	141.808	112.876	75.3703	40.2903	21.6621	15.4846	12.3282	9.86961	7.74997	6.12491	4.85177	3.99117	3.42926	2.83204	2.36646	2.05968	1.87068	1.63418	1.44212	1.30407	1.20587	1.12331	1.06072	1.01812	0.971852	0.914956	0.863376	0.834449	0.809096	0.793049	0.762957	0.72477	0.656599	0.596623	0.531618	0.468274	0.438127	0.407943	0.374542	0.337754	0.325012
623	HtMi / HtMi	young	b	C3A2	305.667	69.9198	140.994	104.737	86.0796	62.9361	39.8841	24.8886	17.3061	13.1644	10.5706	9.03441	8.04267	6.92309	5.63378	4.48539	3.72049	3.05562	2.57988	2.22895	1.93642	1.84374	1.71949	1.58745	1.42495	1.32465	1.25777	1.17463	1.05828	0.95918	0.849767	0.724269	0.628058	0.565588	0.525775	0.497966	0.466337	0.465586	0.437623	0.419856	0.434911	0.452481	0.460787	0.507692	0.567675
623	HtMi / HtMi	young	r	C3A2	375.667	87.2168	160.953	117.004	109.597	89.8669	64.4763	41.0488	27.0334	20.361	16.9863	14.4744	12.106	9.60285	8.03156	6.38852	5.05592	4.13143	3.52046	2.94985	2.58583	2.36974	2.15874	1.97106	1.8906	1.73261	1.59331	1.43615	1.29539	1.14262	1.01625	0.892483	0.810774	0.730298	0.675461	0.640177	0.597173	0.585868	0.58776	0.596074	0.598412	0.561565	0.544879	0.571347	0.618016
624	HtMa / HtMi	young	b	C3A2	341.667	46.4836	75.9277	60.0344	66.2217	50.6757	33.5583	23.1313	16.2817	11.8495	9.36699	7.7589	6.59781	5.60273	4.76212	4.05976	3.54977	3.13401	2.81255	2.56035	2.41991	2.26048	2.20902	2.15377	2.05305	1.98655	1.93776	1.84672	1.95074	1.94312	1.79019	1.47945	1.16172	0.930037	0.728283	0.609256	0.519637	0.449055	0.393369	0.35514	0.323668	0.308248	0.293495	0.27874	0.263998
624	HtMa / HtMi	young	r	C3A2	344.667	24.1213	60.3949	75.7182	89.3511	71.8456	48.0618	32.2181	23.0834	16.5501	12.8204	10.349	8.58223	7.26608	6.0548	5.06874	4.255	3.5917	3.24116	2.92483	2.65583	2.47116	2.37137	2.25944	2.13157	2.04739	2.05069	2.08689	2.12324	2.09315	1.88235	1.54525	1.24537	0.984238	0.781628	0.635916	0.544753	0.47852	0.416198	0.369573	0.336822	0.31989	0.293224	0.272584	0.257691
625	HtMa / HtMi	young	b	C3A2	322.333	58.9386	105.39	95.17	108.069	94.82	64.8187	41.1813	28.119	20.5353	15.23	11.3318	8.92072	7.33669	5.9197	5.01765	4.25991	3.57437	3.05492	2.68906	2.43332	2.23666	2.12765	2.13206	2.02862	1.99572	1.99159	1.97061	1.90897	1.78443	1.66994	1.51182	1.36553	1.18796	1.07647	0.97499	0.873575	0.833681	0.818653	0.813205	0.818276	0.793232	0.766832	0.71829	0.648784
625	HtMa / HtMi	young	r	C3A2	343.667	42.2474	90.9913	99.9309	130.467	115.664	87.0763	59.8274	39.0661	27.2835	20.2349	15.9588	12.3424	9.53455	7.65068	6.22874	5.11682	4.43302	3.8815	3.41586	3.09172	2.87409	2.74536	2.65094	2.55918	2.43052	2.36048	2.25892	2.13157	2.01604	1.95434	1.86252	1.69863	1.51147	1.3277	1.2368	1.16896	1.13084	1.11327	1.11584	1.18304	1.18522	1.17409	0.986961	0.804267
626	HtMa / HtMa	young	b	C3A2	283.667	54.8656	87.3172	50.6174	37.1963	33.6047	27.5423	21.7771	18.0094	15.8453	14.4344	13.858	13.1917	13.0257	11.324	9.79039	8.08351	6.31248	5.01418	4.13238	3.44667	3.01648	2.76312	2.67424	2.53513	2.39442	2.1503	1.99113	1.77623	1.63832	1.54241	1.37594	1.25285	1.18386	1.09977	1.09018	1.00554	0.91622	0.825277	0.802232	0.722603	0.676706	0.673287	0.637823	0.587354
626	HtMa / HtMa	young	r	C3A2	319.333	30.9599	71.3346	64.9382	68.0769	66.4967	54.6387	45.4569	36.9573	30.3249	26.9774	24.2661	21.508	18.0551	15.0038	11.8086	9.28111	7.5631	6.25317	5.26017	4.62488	4.03552	3.63831	3.45144	3.2719	3.06478	2.89401	2.72835	2.37356	2.14338	1.91117	1.7358	1.65997	1.53356	1.46859	1.38325	1.27614	1.18686	1.1337	1.0639	0.946673	0.809469	0.719946	0.648784	0.627336
627	HtMa / HtMa	young	b	C3A2	302	59.0881	124.366	118.331	118.25	87.7203	56.5588	36.5511	25.3513	19.1823	15.8818	13.2984	11.4842	9.97241	8.6139	7.34345	6.32995	5.59114	4.81172	4.3391	3.91111	3.53671	3.25762	3.0304	2.83204	2.76503	2.66318	2.70645	2.68596	2.72458	2.80867	2.77204	2.67301	2.61758	2.57751	2.44625	2.21208	2.11252	1.97834	1.86595	1.73061	1.60288	1.43913	1.23481	1.0522
627	HtMa / HtMa	young	r	C3A2	329.333	46.3127	116.172	131.099	156.135	134.741	87.1365	57.5307	38.8329	29.3022	23.7083	19.5209	17.0059	13.7404	11.6842	10.0462	8.44306	7.21606	6.22587	5.51569	4.82059	4.29042	3.95003	3.64418	3.50752	3.41586	3.33119	3.4578	3.47136	3.54732	3.53183	3.41586	3.3037	3.14992	2.84119	2.65644	2.46434	2.40381	2.33668	2.27929	2.0611	1.71554	1.38739	1.14025	0.956313
628	HtMa / HtMi	young	b	C3A2	280.667	46.1211	74.0798	36.1077	29.2483	24.1657	18.4035	15.08	12.0559	9.94489	8.45863	6.99842	5.70164	4.79071	3.98016	3.24938	2.73653	2.36157	2.13255	1.92265	1.73301	1.56423	1.48115	1.42824	1.36836	1.27732	1.13292	1.01274	0.892072	0.768245	0.664202	0.575175	0.503617	0.439744	0.398199	0.352046	0.315718	0.291877	0.275359	0.254214	0.240215	0.229509	0.237739	0.246434	0.26872
628	HtMa / HtMi	young	r	C3A2	295.667	32.7718	82.6418	46.8598	33.5429	28.2228	21.252	17.1554	13.5738	10.6905	8.95571	7.6542	6.57961	5.32721	4.21308	3.4898	2.97577	2.50035	2.15377	1.91955	1.69863	1.55418	1.45479	1.35083	1.25661	1.17409	1.07374	1.01742	0.944278	0.82737	0.74319	0.67515	0.567937	0.489441	0.437321	0.382825	0.354405	0.31886	0.289935	0.268968	0.258583	0.255329	0.249689	0.248771	0.25439
629	HtMa / HtMa	young	b	C3A2	309.333	30.4089	88.7973	105.051	102.754	78.5597	49.2493	28.6418	19.4805	14.0896	11.0433	8.94953	7.1105	5.71479	4.91134	4.29833	3.55386	2.96688	2.46434	2.07587	1.83358	1.65196	1.46352	1.36207	1.27673	1.18005	1.08868	1.03086	0.987643	0.93476	0.877809	0.88308	0.86139	0.828133	0.798178	0.710068	0.645208	0.611646	0.555648	0.508159	0.494311	0.492606	0.520955	0.598274	0.729962
629	HtMa / HtMa	young	r	C3A2	373	66.8344	136.553	121.759	119.124	118.577	102.188	59.7723	34.6019	24.0547	18.2894	14.2004	10.5682	8.29469	6.51778	5.54115	4.48539	3.87436	3.3075	2.72961	2.42493	2.09991	1.91205	1.82138	1.68306	1.54846	1.45881	1.33199	1.22377	1.16038	1.08993	1.03205	0.959622	0.888587	0.783069	0.711705	0.652529	0.597173	0.548151	0.52942	0.495222	0.49545	0.547394	0.613903	0.725103
630	HtMa / HtMi	young	b	C3A2	316	97.6787	202.069	167.919	174.381	156.639	116.627	74.4218	48.1726	35.2858	26.485	20.0355	15.1043	12.0088	10.1906	8.39267	7.0291	6.02976	5.1027	4.4269	3.97741	3.40017	3.04089	2.82879	2.59597	2.41102	2.24802	2.07778	1.88973	1.71989	1.5417	1.42791	1.35957	1.30077	1.19207	1.12021	1.06072	1.01742	0.957635	0.863575	0.837336	0.853297	0.920026	1.00809	1.16011
630	HtMa / HtMi	young	r	C3A2	344.667	70.3234	167.186	179.846	213.255	219.887	169.863	115.638	76.243	51.4991	38.1856	28.3661	21.9483	17.2187	13.7848	11.463	9.16431	7.75532	6.64202	5.75705	4.7687	4.23448	3.8824	3.52046	3.09172	2.79963	2.60675	2.43837	2.29668	2.08401	1.9059	1.81635	1.68074	1.57036	1.44944	1.33629	1.2314	1.18386	1.1285	1.04689	1.03944	1.03753	1.06316	1.1246	1.20893
631	HtMa / HtMa	young	b	C3A2	322.333	29.2415	63.7236	64.2392	69.1353	47.3587	25.4859	16.5425	11.6198	8.25468	6.54184	5.19757	4.19566	3.58261	3.08674	2.7227	2.45923	2.09991	1.82852	1.62368	1.46049	1.35021	1.2494	1.15292	1.06096	1.01438	0.986507	0.9482	0.889201	0.882877	0.915799	0.946673	0.954333	0.983785	1.02825	1.11301	1.17625	1.20948	1.32434	1.47707	1.66418	1.78896	1.56783	1.2936	1.12228
631	HtMa / HtMa	young	r	C3A2	347.333	29.1877	72.3769	84.489	97.7687	82.6609	50.8276	29.3833	19.7925	13.8612	10.6635	8.33873	6.64814	5.41502	4.56878	3.78094	3.29534	2.74094	2.38726	2.15625	1.91205	1.79846	1.63719	1.53993	1.41906	1.33752	1.28588	1.24222	1.19674	1.21843	1.23908	1.25864	1.24968	1.34276	1.44844	1.5216	1.60731	1.86595	2.1737	2.61879	3.14775	3.33273	2.8827	2.1508	1.508
632	HtMa / HtMa	young	b	C3A2	291.333	38.4326	87.0964	99.8849	123.197	106.463	68.5646	37.8355	24.7116	16.7958	12.4882	10.3777	8.4918	6.87068	5.34072	4.67627	3.97009	3.36047	2.90068	2.55918	2.28718	2.09363	1.96834	1.91999	1.95839	2.02255	2.08401	2.1717	2.36483	2.64728	2.85102	2.52697	2.16172	1.79639	1.50869	1.36427	1.20726	1.07029	1.01719	0.985825	1.01555	0.984238	0.966273	0.930465	0.864968
632	HtMa / HtMa	young	r	C3A2	362.333	42.2571	96.7386	113.266	140.767	130.107	93.1751	55.1188	33.2736	23.0409	16.9356	13.5052	11.1764	9.02818	6.92628	5.65327	4.81726	4.0879	3.43084	3.01509	2.72019	2.48599	2.2683	2.17921	2.16421	2.13796	2.18072	2.21973	2.29456	2.60976	2.98401	3.28927	3.20406	2.84446	2.26569	1.8531	1.57761	1.37531	1.29033	1.24767	1.31311	1.40185	1.38963	1.24051	1.04882
633	HtMa / HtMa	young	b	C3A2	285.667	32.9913	87.3776	120.893	140.67	107.251	65.9933	40.6443	27.7715	20.7205	15.6027	12.1703	9.57194	7.71614	6.63743	5.67675	4.80397	4.10582	3.53671	3.1463	2.79062	2.558	2.34639	2.22946	2.19533	2.15973	2.08018	2.06824	2.05447	1.94267	1.85396	1.7187	1.52721	1.34091	1.19812	1.08568	0.97949	0.87882	0.783791	0.725437	0.692309	0.670656	0.592925	0.539759	0.497622
633	HtMa / HtMa	young	r	C3A2	377.333	36.0579	102.164	143.516	158.635	117.274	71.4496	47.9402	31.4485	22.9774	17.4622	13.3567	10.6488	9.09076	7.31981	6.15177	5.15347	4.44939	3.86011	3.37831	2.92213	2.6418	2.47571	2.34585	2.30887	2.27877	2.26204	2.319	2.30569	2.1747	2.03142	1.84969	1.62967	1.38995	1.17166	1.01088	0.890635	0.79726	0.725772	0.708761	0.701455	0.668498	0.599239	0.513452	0.467843
646	HtMa / HtMa	young	b	C3A2	343.333	61.8738	116.031	97.308	96.8603	78.567	50.3595	32.0591	22.9382	18.6756	16.2023	13.9674	12.0913	10.9031	9.2277	7.9528	6.6883	5.529	4.6496	3.9082	3.2858	2.8871	2.5754	2.3988	2.2144	2.0541	1.8944	1.7816	1.7356	1.6068	1.5435	1.5332	1.4414	1.3341	1.2837	1.2042	1.1181	1.0198	0.914	0.8561	0.7817	0.7483	0.7043	0.6505	0.6196
646	HtMa / HtMa	young	r	C3A2	401.333	46.9749	96.994	101.062	109.505	96.8446	68.8797	42.4101	29.5528	23.078	20.0718	17.5228	14.8217	12.2877	10.0853	8.3101	6.5701	5.5076	4.6254	3.8887	3.4371	2.9523	2.5283	2.223	1.9585	1.7626	1.6153	1.5432	1.4818	1.4753	1.4856	1.4553	1.3681	1.3044	1.2274	1.0982	0.9256	0.8196	0.7587	0.7064	0.6299	0.5829	0.552	0.5167	0.4736
649	HtMa / HtMa	young	b	C3A2	340.667	74.0947	121.856	63.4424	49.7861	35.4131	24.1798	17.4883	13.1114	10.452	8.3452	7.0006	6.1053	5.239	4.3388	3.7403	3.2473	2.8843	2.566	2.2913	2.0816	1.9544	1.8857	1.7712	1.6763	1.5773	1.4173	1.3187	1.2689	1.2255	1.199	1.182	1.1603	1.0846	1.0024	0.9861	1.0009	0.9441	0.9365	0.9707	0.9912	0.9528	0.8952	0.8135	0.7687
649	HtMa / HtMa	young	r	C3A2	354.333	30.302	58.3052	52.3581	52.1746	43.3276	32.8081	24.0741	17.5531	13.8764	11.3765	9.6253	8.0908	6.7633	5.5758	4.6016	3.9876	3.4414	2.9545	2.7222	2.4865	2.3134	2.2023	2.0425	1.9158	1.8022	1.6992	1.5643	1.4574	1.4231	1.3579	1.3221	1.2607	1.2078	1.1108	1.0442	1.0078	0.9451	0.8963	0.853	0.8072	0.7658	0.7537	0.7279	0.7095
650	HtMa / HtMa	young	b	C3A2	330	31.0572	67.5492	73.7187	67.5258	42.9348	25.2544	15.6413	10.6312	8.5021	7.0343	6.0344	5.4387	4.8135	4.0614	3.4475	3.0478	2.6058	2.2264	1.9794	1.833	1.7434	1.6323	1.5858	1.5054	1.4335	1.4939	1.5239	1.4463	1.3976	1.2472	1.0989	0.9563	0.8386	0.7664	0.709	0.6524	0.6304	0.5969	0.5503	0.5109	0.5249	0.5323	0.5115	0.4851
650	HtMa / HtMa	young	r	C3A2	314.667	68.2425	112.477	101.543	104.323	70.722	44.1212	26.7045	17.5795	13.4591	11.0875	8.988	7.7266	6.6022	5.4811	4.5484	3.9431	3.3101	2.8834	2.575	2.2697	2.1049	2.002	1.9654	1.9012	1.8207	1.8934	2.0043	2.0587	2.0612	1.8717	1.6373	1.3637	1.1544	1.0571	0.957	0.8727	0.8309	0.7596	0.7347	0.7667	0.8353	0.9135	0.8476	0.7073
651	HtMa / HtMi	young	b	C3A2	363.667	36.3797	73.646	72.7283	75.1622	55.9499	35.3029	22.0036	15.7986	12.4293	10.6024	9.3994	8.5666	7.7117	6.5621	5.7472	5.0334	4.42	4.0297	3.6278	3.3431	3.2911	3.2149	3.1911	3.2606	3.3207	3.4559	3.4636	3.5185	3.4303	2.8782	2.3075	1.8268	1.4603	1.1698	0.962	0.8059	0.7174	0.6636	0.6247	0.5796	0.53	0.5064	0.5035	0.5259
651	HtMa / HtMi	young	r	C3A2	425.667	63.2425	108.643	84.9351	83.8057	61.7635	40.0173	26.7532	19.6207	15.8601	13.141	11.1876	10.0929	8.9692	7.8337	6.6702	5.8256	4.9338	4.3487	3.9415	3.7264	3.496	3.5669	3.5224	3.61	3.7157	3.8076	4.1072	4.253	4.2617	3.9658	3.3093	2.5951	1.9424	1.4652	1.1364	0.9515	0.848	0.7542	0.6944	0.6425	0.6088	0.5827	0.5533	0.5359
652	HtMa / HtMa	young	b	C3A2	383	33.4184	67.8165	53.5155	46.6011	39.6492	29.1762	21.2627	15.9768	13.0325	10.908	9.6911	8.7542	7.705	6.7145	5.8172	5.1382	4.4312	3.8507	3.4804	3.0829	2.7916	2.5127	2.3825	2.2824	2.1748	2.0703	2.0031	1.9841	1.7973	1.6244	1.443	1.2428	1.1122	0.9874	0.9123	0.8149	0.7268	0.6764	0.6224	0.5936	0.5636	0.5419	0.5337	0.5388
652	HtMa / HtMa	young	r	C3A2	360.667	239.364	436.025	196.264	73.6516	59.2751	44.2728	32.3668	24.4918	19.5459	16.4188	14.0664	12.0035	10.4059	9.0008	7.9243	6.7493	5.6138	4.7333	4.1357	3.7927	3.4881	3.1742	2.9477	2.8846	2.7897	2.7287	2.632	2.47	2.2855	2.0804	1.8643	1.6389	1.4356	1.2503	1.094	0.9891	0.8913	0.7981	0.729	0.6899	0.6345	0.6104	0.5874	0.5768
653	HtMa / HtMa	young	b	C3A2	395.667	48.83	107.05	131.315	148.747	96.5176	44.7931	24.2204	16.627	12.1387	9.1136	7.32	6.363	5.4877	4.6328	3.8329	3.3991	3.0475	2.6925	2.4472	2.2596	2.1129	1.9962	1.9407	1.9128	1.934	1.9068	1.8009	1.7919	1.7027	1.5778	1.5036	1.4153	1.3205	1.2392	1.1379	1.0282	0.9851	0.9755	0.9433	0.9192	0.8895	0.8389	0.8303	0.8354
653	HtMa / HtMa	young	r	C3A2	411.333	58.2985	137.424	171.294	206.534	158.286	84.9929	42.7767	26.0543	18.4173	14.2784	11.3048	9.0177	7.8415	6.5183	5.368	4.6713	4.2434	3.6101	3.2836	3.0059	2.8151	2.657	2.4682	2.4338	2.4388	2.2817	2.1756	2.1848	2.1125	1.8698	1.7299	1.5933	1.4689	1.2883	1.1762	1.1458	1.1257	1.1014	1.1109	1.1483	1.1265	1.0732	1.0184	0.9667
654	HtMa / HtMa	young	b	C3A2	322.667	54.5186	103.215	99.8287	117.029	101.903	71.8233	45.1063	29.2731	21.51	17.2241	13.4828	11.1586	9.0776	7.5976	6.4112	5.4364	4.7355	4.1038	3.6034	3.1928	2.8549	2.5269	2.2555	2.1098	1.9355	1.7444	1.5627	1.455	1.3656	1.2607	1.1944	1.1165	1.0548	1.0246	0.9943	0.9473	0.926	0.9126	0.9653	1.0383	1.1323	1.2608	1.3221	1.4044
654	HtMa / HtMa	young	r	C3A2	404.333	94.8909	137.153	104.062	114.868	98.343	76.0801	50.7562	32.6148	22.0244	17.4543	14.5656	11.6638	9.5282	8.0798	6.4996	5.3192	4.4509	3.8178	3.3675	2.9565	2.644	2.4522	2.282	2.0651	1.9092	1.7305	1.572	1.4982	1.3813	1.2998	1.2103	1.1527	1.1249	1.0606	1.0047	0.9878	0.9356	0.9244	0.9492	0.9931	1.0953	1.171	1.2497	1.2494
657	HtMa / HtMa	young	b	C3A2	398.333	28.1867	61.7514	65.2778	66.4883	49.6292	31.1603	20.5916	15.5156	12.9768	11.0219	9.6824	8.5886	7.907	6.9342	5.8917	4.9863	4.3451	3.5947	3.1084	2.7355	2.4784	2.2294	2.0398	1.8558	1.6662	1.5052	1.3522	1.2126	1.0475	0.92	0.8524	0.7779	0.7113	0.6422	0.6036	0.5683	0.5425	0.5106	0.4816	0.4737	0.4422	0.4412	0.4394	0.4418
657	HtMa / HtMa	young	r	C3A2	391.667	26.4389	65.5247	80.3888	83.6754	66.371	43.1346	26.7712	19.573	16.1175	13.6264	11.7905	10.6606	9.7042	8.239	6.7659	5.3138	4.3609	3.7589	3.0959	2.7256	2.4195	2.0923	1.8745	1.7101	1.535	1.4015	1.2798	1.1272	1.0152	0.8885	0.782	0.7242	0.6603	0.6162	0.5805	0.5512	0.5182	0.4926	0.4621	0.4381	0.4097	0.3974	0.3807	0.3631
658	HtMa / HtMi	young	b	C3A2	361.333	94.4419	197.125	141.25	122.856	95.7293	60.061	36.7716	24.327	17.8077	13.755	11.0474	9.2483	8.1554	7.0798	5.9398	5.1668	4.4758	3.8205	3.3275	3.0024	2.6786	2.4888	2.333	2.2865	2.1716	2.0976	2.0266	1.8788	1.6755	1.542	1.4606	1.3766	1.2899	1.1826	1.1167	1.0574	1.0105	0.9521	0.8772	0.8145	0.8053	0.8007	0.799	0.7916
658	HtMa / HtMi	young	r	C3A2	369.667	136.015	228.653	169.937	183.344	157.779	114.116	68.1613	41.6317	29.9331	23.5394	18.294	14.3688	12.2124	10.1907	8.5017	7.3945	6.095	5.2373	4.6836	4.0783	3.6209	3.3629	3.1755	3.0427	2.9577	2.8787	2.6981	2.4919	2.2763	2.1219	1.9906	1.8069	1.7198	1.6341	1.4827	1.3725	1.2569	1.1561	1.0672	1.0008	0.9887	0.9529	0.9375	0.9131
660	HtMa / HtMa	young	b	C3A2	380	251.155	408.408	216.178	179.238	162.694	120.676	71.9181	41.8702	28.1414	21.9314	18.228	14.467	11.798	10.5658	9.1132	7.6543	6.4442	5.5384	4.7716	4.247	3.9138	3.5415	3.2657	3.0527	2.8534	2.6523	2.3804	2.2038	2.0306	1.8592	1.707	1.5961	1.4314	1.3065	1.2643	1.19	1.1268	1.0899	1.0482	1.0154	0.9677	0.9134	0.8273	0.7169
660	HtMa / HtMa	young	r	C3A2	335.667	318.677	555.88	295.957	260.886	237.482	191.507	123.059	73.0999	46.6667	35.3375	28.6619	23.1733	18.5329	14.9656	12.8041	10.7608	8.7204	7.1856	6.3077	5.6445	5.1222	4.6948	4.1796	3.7332	3.4676	3.1978	3.0346	2.8809	2.6484	2.4234	2.2054	2.0099	1.8343	1.6599	1.5522	1.4735	1.4186	1.4437	1.442	1.4994	1.4389	1.2983	1.1383	0.9332
661	HtMa / HtMi	young	b	C3A2	349.333	72.1853	130.292	108.758	107.833	100.516	71.4259	40.2709	25.2951	18.4518	14.3393	11.8227	9.1556	7.7905	6.5935	5.3146	4.3075	3.5339	2.9326	2.4637	2.1695	1.9218	1.7211	1.5313	1.3994	1.3154	1.268	1.2669	1.2465	1.2114	1.1832	1.1665	1.1092	1.052	1.0311	0.9731	0.955	0.9665	0.9831	0.9856	0.9777	0.9662	0.9158	0.782	0.6569
661	HtMa / HtMi	young	r	C3A2	365	92.8678	153.989	137.948	136.419	129.442	103.57	62.8864	38.1363	27.9605	22.4042	17.6048	13.9255	11.7452	9.4394	7.5812	5.9418	4.6433	3.8195	3.3149	2.8619	2.4073	2.1274	1.9579	1.7861	1.7662	1.7261	1.6567	1.6207	1.6498	1.6299	1.62	1.577	1.504	1.4123	1.3742	1.3898	1.448	1.5299	1.7238	1.773	1.6558	1.4223	1.1229	0.8618
662	HtMa / HtMi	young	b	C3A2	366.333	92.4478	197.772	126.691	132.436	113.787	78.9926	52.9204	36.599	26.5825	20.2923	16.671	13.8272	11.2824	9.1186	7.6031	6.4352	5.2664	4.5605	3.9615	3.5714	3.2929	3.061	2.9495	2.7675	2.5297	2.449	2.3548	2.2345	2.0313	1.8275	1.597	1.3731	1.2046	1.0678	0.9703	0.9067	0.8436	0.767	0.7583	0.7559	0.7747	0.7619	0.7311	0.6711
662	HtMa / HtMi	young	r	C3A2	378.333	46.211	107.611	108.402	139.629	132.037	98.6957	67.6231	48.8298	36.6022	28.2366	22.4418	18.0518	14.7679	11.7239	9.3115	7.3688	6.1873	5.336	4.7657	4.2063	3.8089	3.4928	3.258	3.1157	2.9922	2.7224	2.5866	2.4804	2.2629	2.0224	1.8014	1.5341	1.3387	1.1911	1.0807	0.9888	0.9284	0.9115	0.9105	1.0235	1.1498	1.1894	1.0274	0.8466
664	HtMa / HtMa	young	b	C3A2	276	71.6738	141.329	137.161	154.339	120.513	76.7778	46.304	29.3493	20.8351	16.7922	13.3326	10.8387	9.2525	7.5464	6.4341	5.637	4.7538	4.1997	3.7288	3.2701	3.0895	2.8073	2.6622	2.5599	2.4555	2.4017	2.267	2.1744	2.0727	1.8928	1.6988	1.5045	1.3262	1.1847	1.0635	0.9614	0.8857	0.8613	0.8199	0.7817	0.7535	0.7216	0.6571	0.6094
664	HtMa / HtMa	young	r	C3A2	338.667	43.2255	114.565	153.224	200.852	180.159	127.634	78.805	54.8755	38.5537	28.7707	21.1486	16.318	13.2196	11.0878	9.3883	7.9839	6.9599	5.9144	5.2248	4.6533	4.1091	3.8704	3.5909	3.3728	3.1005	2.868	2.7216	2.6191	2.5075	2.266	2.005	1.8296	1.6128	1.4622	1.2478	1.1471	1.0832	1.0414	0.9841	0.9638	0.993	0.9109	0.8276	0.7281
666	HtMa / HtMa	young	b	C3A2	300.333	98.7351	225.529	207.575	214.038	198.802	157.814	100.791	60.659	39.7825	29.6465	23.1315	18.6661	14.7663	11.5389	9.5879	8.1413	6.743	5.9161	5.0787	4.5231	4.0919	3.647	3.4218	3.2784	3.071	3.0241	2.8908	2.883	2.8691	2.7719	2.6119	2.4576	2.357	2.3528	2.3352	2.3793	2.5186	2.6997	2.9135	2.9006	2.5171	2.0812	1.7448	1.4261
666	HtMa / HtMa	young	r	C3A2	364.333	82.2618	192.977	177.902	212.515	223.395	176.562	112.613	71.6824	49.0586	38.0804	29.8566	24.0367	19.0531	14.9431	12.2535	9.9497	8.2282	7.0244	6.3517	5.5904	5.0679	4.7825	4.4992	4.3147	4.144	4.0522	4.1026	4.131	4.1326	3.9368	3.6657	3.4422	3.2858	3.2586	3.3276	3.2939	3.6603	4.5354	5.1102	4.6703	3.6855	2.7469	2.166	1.72
667	HtMa / HtMa	young	b	C3A2	354.333	45.2639	118.056	121.851	122.74	103.449	76.7634	55.0617	39.532	28.8665	22.9375	19.0831	16.4332	13.8867	11.653	9.7807	8.3841	7.0724	6.1631	5.3676	4.8113	4.4102	3.9824	3.8365	3.6275	3.4868	3.4614	3.5505	3.679	3.598	3.3825	3.2071	2.9315	2.6305	2.3462	2.0964	1.8975	1.7146	1.6011	1.5478	1.5178	1.523	1.5267	1.4377	1.2716
667	HtMa / HtMa	young	r	C3A2	319	237.321	264.522	149.535	157.247	138.893	103.299	71.391	50.9584	37.5293	30.4298	25.262	21.9915	18.043	14.4326	11.7598	9.8655	8.0657	7.1371	6.4859	5.6712	5.034	4.6151	4.3787	4.3173	4.3185	4.1622	4.0565	4.2348	4.2914	4.1085	3.7266	3.224	2.8647	2.4993	2.2032	2.0279	1.9294	1.8652	1.8663	1.9302	2.1887	2.5365	2.5117	2.0547
668	HtMa / HtMa	young	b	C3A2	354.333	99.2767	131.175	80.374	92.6328	81.5728	54.1543	30.6413	19.5963	13.8722	10.5588	8.6145	7.2223	6.0404	5.2423	4.4618	3.7148	3.1215	2.6437	2.2254	1.9452	1.7862	1.6134	1.4709	1.3859	1.3117	1.218	1.1205	1.0463	0.9588	0.9033	0.8495	0.7466	0.6918	0.6364	0.5858	0.5341	0.5006	0.4618	0.4112	0.387	0.3749	0.3709	0.3645	0.3611
668	HtMa / HtMa	young	r	C3A2	350	39.6427	82.0806	69.2826	83.2276	92.3656	68.9709	39.3731	23.318	16.2158	12.4694	9.4808	7.7793	6.8762	5.7439	4.7388	3.9091	3.2277	2.6937	2.3598	2.0246	1.8006	1.6623	1.5642	1.4727	1.3588	1.286	1.1907	1.1007	1.028	0.9394	0.8657	0.7954	0.7524	0.6566	0.5983	0.5484	0.5001	0.4632	0.4332	0.4084	0.3773	0.3631	0.3602	0.3664
669	HtMi / HtMi	young	b	C3A2	332.667	36.2171	79.7787	80.607	90.1362	77.7234	55.8087	32.5163	18.5102	12.8096	9.7775	7.6773	6.5315	5.6538	4.7435	4.1047	3.5089	3.0643	2.7147	2.2855	1.9308	1.6909	1.5333	1.3892	1.2465	1.1282	1.0506	0.9663	0.9033	0.849	0.8172	0.7817	0.7404	0.6947	0.6748	0.6742	0.71	0.7498	0.802	0.9037	1.0437	1.2397	1.4676	1.5019	1.2121
669	HtMi / HtMi	young	r	C3A2	372.333	41.789	101.238	112.394	127.648	113.726	81.4039	48.9067	29.2298	18.7273	13.7254	10.4587	8.6032	6.9977	5.7307	4.7509	4.0381	3.4635	2.9865	2.5987	2.1947	1.9694	1.769	1.6121	1.4529	1.3428	1.2331	1.1166	1.0407	0.9412	0.8946	0.8665	0.8206	0.7879	0.7791	0.7869	0.799	0.8582	0.9305	1.0763	1.3242	1.7632	2.2335	2.1085	1.4994
670	HtMa / HtMa	young	b	C3A2	286	51.4632	115.013	125.545	139.592	114.436	89.4123	66.3204	43.9806	30.0483	21.6193	17.2928	13.8385	11.0189	9.0919	7.4819	6.0598	5.0932	4.2538	3.6118	3.2391	2.8288	2.5554	2.3959	2.2497	2.1274	2.0902	1.9486	1.8082	1.6783	1.5571	1.4701	1.3392	1.2371	1.1315	1.0142	0.9493	0.9016	0.8265	0.7889	0.7795	0.7471	0.7229	0.7698	0.7972
670	HtMa / HtMa	young	r	C3A2	377	321.063	337.564	142.933	130.882	118.963	101.971	86.3116	57.5251	38.1855	27.8981	22.0126	17.4724	14.1433	10.964	8.7014	7.0123	5.7663	4.8293	4.1391	3.5408	3.1936	2.9586	2.7122	2.5621	2.4166	2.3024	2.1955	2.0683	1.9276	1.8709	1.7298	1.5328	1.4234	1.3223	1.1579	1.0617	0.9499	0.8579	0.8074	0.7555	0.7127	0.6821	0.6813	0.6813
673	HtMa / HtMa	young	b	C3A2	377.667	69.275	111.795	74.7479	62.2376	41.753	24.4886	15.3564	10.9291	9.0583	8.0819	6.8165	6.037	5.4308	4.947	4.5709	3.9738	3.3792	2.9689	2.6193	2.2577	2.0211	1.7636	1.5672	1.4733	1.3822	1.329	1.2218	1.0848	1.0067	0.9544	0.8624	0.7958	0.7316	0.6553	0.5948	0.54	0.4908	0.4569	0.4344	0.4215	0.4108	0.4307	0.4497	0.4631
673	HtMa / HtMa	young	r	C3A2	361	87.4619	146.919	121.642	108.988	76.1939	45.5018	28.6271	21.5597	17.334	13.4781	10.4691	8.9428	7.646	6.6724	5.6988	4.9622	4.4045	3.8073	3.2424	2.8298	2.553	2.2683	2.0081	1.88	1.7838	1.7126	1.5752	1.4694	1.3702	1.2699	1.118	0.9852	0.8897	0.805	0.7079	0.6336	0.5864	0.5441	0.5095	0.4947	0.496	0.5154	0.5455	0.5267
674	HtMa / HtMi	young	b	C3A2	349.333	134.135	225.542	139.255	130.503	100.584	64.5479	39.7121	24.4068	16.9905	12.806	9.8403	8.0796	6.701	5.5451	4.607	4.0093	3.412	3.0149	2.5937	2.2609	2.0296	1.8537	1.7366	1.6322	1.5728	1.5617	1.5038	1.4008	1.3211	1.2255	1.1493	1.0763	0.9931	0.8937	0.8034	0.7284	0.6742	0.6441	0.5934	0.5376	0.5433	0.5268	0.5073	0.5222
674	HtMa / HtMi	young	r	C3A2	375	207.927	317.533	151.252	119.705	93.1659	64.0872	42.5828	27.5483	19.471	15.0493	11.6027	8.9522	7.4774	6.0601	4.8737	4.1118	3.6656	3.0873	2.6284	2.3542	2.16	2.0023	1.8695	1.8493	1.7719	1.6935	1.6089	1.4966	1.3541	1.2715	1.1693	1.0677	0.9929	0.9034	0.8087	0.7368	0.6838	0.6231	0.5923	0.5711	0.5387	0.5241	0.4995	0.4924
[truncated: 40 more columns]
