# Supplementary material for: Haplotype of the astrocytic water channel AQP4 is associated with slow wave energy regulation in human NREM sleep
Source: PLoS Biol. 2020 May 5;18(5):e3000623. doi: 10.1371/journal.pbio.3000623 (PMC7199924; doi:10.1371/journal.pbio.3000623)
Supplement: S5 Data — REM, rapid eye movement. (XLSX) [file pbio.3000623.s010.xlsx]

## Sheet: REM EEG data_ whole night
Subject_ID	AQP4_ht2	age_group	night	derivation	REMmin	bin01	bin02	bin03	bin04	bin05	bin06	bin07	bin08	bin09	bin10	bin11	bin12	bin13	bin14	bin15	bin16	bin17	bin18	bin19	bin20	bin21	bin22	bin23	bin24	bin25	bin26	bin27	bin28	bin29	bin30	bin31	bin32	bin33	bin34	bin35	bin36	bin37	bin38	bin39	bin40	bin41	bin42	bin43	bin44
2	HtMa / HtMa	young	r	C3A2	74.3333	10.906	16.7859	8.0788	5.3975	4.3091	3.3911	2.8435	2.6077	2.3749	2.1891	1.9213	1.5711	1.3743	1.117	0.9929	0.919	0.8812	0.8115	0.7644	0.6994	0.725	0.6694	0.6173	0.5616	0.5454	0.4949	0.4602	0.4312	0.4159	0.3845	0.3485	0.3525	0.3491	0.3317	0.3168	0.2754	0.2689	0.2665	0.2367	0.2079	0.1799	0.1669	0.1618	0.1429
2	HtMa / HtMa	young	b	C3A2	94	9.33	14.2138	7.9312	5.607	4.4866	3.7517	3.4672	2.9052	2.6218	2.2255	2.0069	1.7036	1.4037	1.2071	1.1497	1.1058	0.9703	0.8843	0.8273	0.8316	0.7973	0.722	0.6975	0.6473	0.5954	0.5496	0.497	0.4536	0.4557	0.441	0.4526	0.4299	0.4337	0.4272	0.4023	0.3964	0.3802	0.3674	0.3232	0.2994	0.2589	0.2174	0.1941	0.1767
3	HtMa / HtMa	young	r	C3A2	127.667	54.1365	63.6909	26.1175	17.2999	12.6496	9.3908	7.7992	6.6328	6.3029	5.954	5.4351	4.6754	3.9843	3.7175	3.3493	3.1013	2.7536	2.4481	2.2584	1.9937	1.8396	1.6279	1.5512	1.5321	1.4453	1.3272	1.2616	1.2142	1.1472	1.1306	1.0155	0.9776	0.9421	0.944	0.9577	0.9727	0.9605	0.9406	0.8675	0.774	0.7283	0.654	0.623	0.5979
3	HtMa / HtMa	young	b	C3A2	130.333	32.728	49.2132	22.891	14.3809	10.0757	7.4488	5.9466	5.4767	5.2682	4.8611	4.2247	3.807	3.5459	3.2535	2.9061	2.6502	2.5521	2.3564	2.2053	2.1361	2.0506	1.8955	1.7557	1.6173	1.5456	1.5006	1.3286	1.2799	1.2498	1.1399	1.0896	1.0501	0.96	0.999	0.981	1.0408	1.0488	0.9957	0.9672	0.8395	0.7268	0.6866	0.6428	0.6173
4	HtMa /HtMi	young	r	C3A2	120	44.578	63.6412	25.0001	13.9282	10.4179	7.4274	5.6121	5.186	5.1186	4.8261	4.6586	4.3075	4.1936	3.7559	3.0852	2.6818	2.4038	2.19	2.0854	2.0148	2.0161	1.8559	1.7568	1.6439	1.5487	1.3985	1.2281	1.2073	1.1574	0.979	0.8134	0.7828	0.7245	0.6606	0.6526	0.6275	0.5463	0.4889	0.424	0.3724	0.3279	0.2904	0.265	0.2445
4	HtMa /HtMi	young	b	C3A2	90	20.0298	28.1411	12.7472	8.252	6.2031	4.6479	3.8746	3.4958	3.2971	3.0271	2.8448	2.6697	2.4123	2.0976	1.7714	1.5129	1.4698	1.3878	1.3995	1.3435	1.2522	1.2119	1.1809	1.0677	0.8926	0.8555	0.7671	0.7206	0.6522	0.5826	0.5438	0.5279	0.5417	0.5144	0.4919	0.4675	0.4171	0.388	0.3712	0.321	0.2731	0.248	0.2245	0.2024
6	HtMa / HtMa	young	r	C3A2	70.6667	13.5422	19.9694	10.3957	6.7202	5.2578	3.9952	3.2857	3.1386	2.7333	2.3161	2.0236	1.842	1.6441	1.4769	1.443	1.3374	1.3118	1.1991	1.1345	1.1943	1.1032	1.0013	0.8925	0.8463	0.8077	0.7496	0.6816	0.7546	0.7857	0.7495	0.7392	0.7101	0.6735	0.6459	0.5819	0.5595	0.4792	0.4467	0.4293	0.4136	0.3839	0.3685	0.3587	0.338
6	HtMa / HtMa	young	b	C3A2	89.6667	12.6719	19.5822	9.7489	5.7293	4.2848	3.337	2.7446	2.5462	2.1938	1.7798	1.5759	1.3809	1.2901	1.32	1.2449	1.1944	1.1597	1.1131	1.1351	1.04	0.9964	0.9984	0.9048	0.8386	0.7808	0.7294	0.6733	0.5841	0.5694	0.5752	0.5758	0.5778	0.6116	0.5731	0.5251	0.5371	0.5508	0.5299	0.5188	0.4494	0.4105	0.3807	0.3915	0.3721
7	HtMa / HtMa	young	r	C3A2	127.333	18.1206	27.956	14.8553	10.8117	8.5045	6.2578	5.3157	5.3054	5.6511	5.631	5.3714	4.5819	4.014	3.5241	3.1625	2.6717	2.4481	2.3153	2.1067	1.7491	1.4631	1.3287	1.1908	0.9815	0.8663	0.7704	0.6758	0.6074	0.5808	0.5773	0.5627	0.5175	0.5208	0.5225	0.5116	0.4733	0.4094	0.3615	0.3241	0.2818	0.2515	0.2329	0.2283	0.2233
7	HtMa / HtMa	young	b	C3A2	126.333	15.0152	23.1572	13.1074	9.4414	7.3937	5.4881	4.5424	4.5105	4.4153	3.9677	3.9577	3.6778	3.4159	2.9602	2.6636	2.4971	2.4445	2.3333	2.192	1.8244	1.4525	1.3204	1.1626	1.0242	0.9148	0.8471	0.7838	0.7293	0.6651	0.6296	0.6281	0.6917	0.7266	0.7848	0.7842	0.7039	0.5551	0.4695	0.4429	0.402	0.337	0.3091	0.3023	0.2862
8	HtMa / HtMa	young	r	C3A2	152.333	32.3131	45.6195	14.3259	8.271	6.26	5.078	4.6619	5.0206	5.0206	5.0533	5.2242	5.049	4.7246	4.0275	3.4763	3.0162	2.5127	2.2977	2.0824	1.8502	1.734	1.5595	1.3747	1.2155	1.0862	0.9722	0.8588	0.7988	0.7514	0.6841	0.5898	0.5124	0.4826	0.4538	0.4133	0.3773	0.3564	0.3282	0.32	0.3019	0.2852	0.2611	0.2402	0.2181
8	HtMa / HtMa	young	b	C3A2	146.333	24.6937	33.6848	12.9132	7.3785	5.8309	4.2901	3.9538	4.1484	4.2272	3.8334	3.6388	3.7331	3.3312	2.9824	2.6001	2.2858	1.9743	1.8775	1.7599	1.6591	1.4857	1.3474	1.2734	1.0982	0.9738	0.9029	0.8406	0.7627	0.6626	0.6325	0.613	0.5637	0.5209	0.4834	0.4588	0.4253	0.3979	0.3687	0.3718	0.3649	0.3629	0.3385	0.3209	0.2853
9	HtMa / HtMa	young	r	C3A2	117	52.9174	73.988	28.395	14.3528	9.7818	6.4801	4.6544	4.1004	3.6944	3.3912	2.9309	2.6694	2.4886	2.3874	2.4234	2.3607	2.1223	1.9243	1.7078	1.6033	1.4298	1.2806	1.3001	1.3789	1.4323	1.456	1.482	1.5512	1.4933	1.2319	0.9436	0.7535	0.6289	0.5318	0.5096	0.4507	0.4149	0.3832	0.3425	0.309	0.2743	0.2371	0.2174	0.2042
9	HtMa / HtMa	young	b	C3A2	108.667	68.5329	86.4389	24.6273	11.1739	7.0506	4.3607	3.4286	3.1631	2.5023	2.2902	2.1847	1.8889	1.7213	1.6472	1.7228	1.7171	1.5415	1.3945	1.3069	1.2184	1.1501	1.1818	1.1867	1.1897	1.1585	1	0.8837	0.8342	0.7983	0.6756	0.6355	0.6091	0.5479	0.5089	0.4695	0.4626	0.4567	0.404	0.3556	0.3343	0.278	0.2378	0.2184	0.2064
10	HtMa /HtMi	young	r	C3A2	118	31.02	47.1693	20.0101	11.7282	9.0724	7.5789	6.3165	5.368	4.9552	4.165	3.6422	3.1719	2.6131	2.2798	2.0593	2.0966	2.0221	1.7243	1.6385	1.6995	1.6029	1.5746	1.5457	1.424	1.3681	1.2669	1.1764	1.1023	1.1154	1.1333	1.1592	1.1688	1.2104	1.154	1.0855	1.0421	0.9966	0.9266	0.8602	0.8106	0.7245	0.6754	0.6522	0.604
10	HtMa /HtMi	young	b	C3A2	106.333	21.6185	38.777	18.148	11.4955	8.7031	6.399	5.5061	5.4554	4.7155	3.6404	3.4885	3.1018	2.5748	2.3361	2.1822	2.0484	1.9084	1.9286	1.872	1.7584	1.8121	1.7209	1.7061	1.6433	1.569	1.4896	1.4421	1.4373	1.3388	1.3529	1.4928	1.6299	1.6939	1.6081	1.4856	1.4794	1.3789	1.2983	1.2067	1.1326	1.0296	0.9275	0.8607	0.7537
11	HtMa / HtMa	young	r	C3A2	114.667	98.4871	86.1943	16.1207	8.519	6.3724	5.1171	4.6205	4.6843	4.8326	4.7849	4.8621	4.8624	4.282	3.5606	2.9724	2.4536	2.2368	1.964	1.797	1.7294	1.646	1.5606	1.472	1.3017	1.1127	1.0327	0.9387	0.9238	0.9622	0.8925	0.7835	0.6775	0.5685	0.5049	0.4505	0.4454	0.442	0.4229	0.3992	0.3854	0.395	0.3775	0.3446	0.3209
11	HtMa / HtMa	young	b	C3A2	142.333	58.0439	71.6433	20.6611	9.1508	6.0812	4.4718	3.6763	3.4244	3.1911	2.7832	2.7377	2.4168	2.1995	1.9952	1.7887	1.5418	1.5051	1.4719	1.3808	1.348	1.2411	1.2192	1.1305	0.9932	0.9041	0.827	0.7553	0.7184	0.6713	0.6425	0.5994	0.5652	0.5681	0.5573	0.5221	0.495	0.4963	0.4998	0.5093	0.4715	0.4351	0.4233	0.3871	0.3459
12	HtMa / HtMa	young	r	C3A2	90.6667	16.2171	29.4063	17.235	11.6284	8.6485	5.9873	4.8254	4.4869	4.0908	3.6983	3.2808	2.8721	2.5139	2.2702	1.9742	1.7513	1.5455	1.4451	1.3756	1.2782	1.1512	1.0593	0.9649	0.8997	0.7987	0.7009	0.6911	0.6499	0.6363	0.6292	0.6145	0.608	0.6407	0.6624	0.7009	0.7329	0.6512	0.5606	0.5005	0.4688	0.4404	0.4061	0.348	0.3109
12	HtMa / HtMa	young	b	C3A2	96.3333	42.0022	72.4706	24.2375	9.6282	6.3317	5.0087	3.8702	3.248	3.0963	2.8774	2.6635	2.3999	2.0864	1.9653	1.6866	1.3994	1.2503	1.2368	1.1501	1.0621	0.9866	0.8587	0.7437	0.7081	0.649	0.5916	0.5906	0.5902	0.5414	0.5201	0.515	0.53	0.5783	0.5764	0.604	0.6485	0.6705	0.6068	0.5694	0.5426	0.5243	0.4967	0.4159	0.3828
13	HtMa / HtMa	young	r	C3A2	114.333	37.7303	48.831	16.6423	10.5726	8.1331	6.8208	5.271	4.4355	3.9534	3.3724	2.8651	2.4987	2.2745	2.0578	1.8059	1.6024	1.491	1.3601	1.3316	1.2577	1.1873	1.1124	0.9723	0.9043	0.8169	0.7315	0.6352	0.5723	0.5251	0.4732	0.4431	0.4261	0.3923	0.383	0.3597	0.3241	0.3067	0.2882	0.2473	0.2284	0.2169	0.2018	0.192	0.1721
13	HtMa / HtMa	young	b	C3A2	139.333	104.595	101.613	18.0314	7.8627	5.5763	4.3368	3.7156	3.3447	3.0341	2.5462	2.2887	2.086	1.847	1.6892	1.5152	1.3777	1.296	1.2047	1.1164	1.0575	0.9238	0.8353	0.7885	0.7051	0.6931	0.6082	0.5245	0.476	0.4177	0.3693	0.344	0.341	0.3253	0.2969	0.2857	0.2707	0.2679	0.2528	0.2331	0.2193	0.1934	0.1751	0.1615	0.1456
14	HtMa / HtMa	young	r	C3A2	109	23.4448	32.3167	13.9267	9.5575	7.6079	5.8269	4.6322	4.0842	4.0122	4.0083	3.6514	3.4285	3.2409	3.0785	2.7599	2.5104	2.4107	2.1586	2.0557	1.9796	1.9655	1.8141	1.6609	1.5032	1.2973	1.2022	1.1236	1.0547	0.9307	0.8428	0.8117	0.7504	0.7192	0.6587	0.6139	0.5653	0.5548	0.5321	0.4356	0.3984	0.3709	0.3498	0.3331	0.3255
14	HtMa / HtMa	young	b	C3A2	114.333	30.1294	45.1643	20.4563	11.1971	7.455	5.3593	4.1749	3.8842	3.8366	3.4943	3.2592	3.0579	2.7563	2.4112	2.1266	1.9295	1.8456	1.7664	1.6807	1.5537	1.5516	1.4749	1.3857	1.3293	1.1711	1.0726	0.9859	0.8413	0.7709	0.7103	0.6639	0.6695	0.6484	0.6068	0.5566	0.5167	0.5011	0.451	0.3938	0.3506	0.3539	0.3501	0.3078	0.2783
15	HtMa /HtMi	young	r	C3A2	128.333	46.5711	56.5453	21.0014	13.3532	9.8007	7.4223	5.9948	5.5328	5.1734	4.7818	4.4369	4.3075	4.0045	3.5627	3.0451	2.9539	2.7976	2.4021	2.1943	2.0713	1.9112	1.671	1.4993	1.2979	1.1349	1.0332	0.9446	0.8294	0.7679	0.7544	0.7293	0.689	0.6498	0.626	0.6279	0.5823	0.4872	0.4001	0.3469	0.3099	0.2897	0.2652	0.2361	0.2162
15	HtMa /HtMi	young	b	C3A2	123.333	244.249	192.846	26.4294	13.1395	8.7693	6.3636	5.0996	4.5025	4.1771	3.9239	3.953	3.7783	3.471	3.1796	2.969	2.9321	2.79	2.7464	2.5545	2.3857	2.2194	1.9925	1.7756	1.4814	1.255	1.1392	1.0073	0.9266	0.8991	0.8962	0.8894	0.8983	0.9089	0.9307	0.853	0.7723	0.6676	0.5813	0.4869	0.3874	0.3184	0.2826	0.247	0.2114
16	HtMa /HtMi	young	r	C3A2	124.667	14.3331	19.5859	9.0309	7.1119	5.6793	4.2268	3.8196	3.4154	3.1238	3.2035	3.4836	3.0999	2.9082	2.8437	2.5207	2.431	2.3746	2.1886	2.1244	1.9606	1.7413	1.6768	1.5519	1.409	1.2876	1.1543	1.0951	1.0511	1.0002	1.0176	1.0084	0.9741	0.918	0.9031	0.8591	0.8358	0.8234	0.7753	0.7393	0.6731	0.5802	0.5032	0.4662	0.423
16	HtMa /HtMi	young	b	C3A2	124.333	18.6044	23.3929	9.6654	6.4186	4.9936	3.7462	3.3345	3.1519	2.9207	2.6747	2.772	2.5978	2.2439	1.9593	1.8498	1.8132	1.6986	1.6272	1.618	1.5643	1.4736	1.3105	1.206	1.1948	1.145	1.0498	0.9584	0.9058	0.8509	0.8585	0.8616	0.8229	0.8596	0.89	0.9102	0.9153	0.9071	0.8938	0.8687	0.8009	0.6603	0.5547	0.5161	0.4359
17	HtMa / HtMa	young	r	C3A2	100	34.561	45.2097	15.5979	8.7034	6.1182	4.6568	3.7968	3.3908	2.9957	2.9297	2.6934	2.4326	2.2019	1.8383	1.5612	1.2973	1.0961	0.9391	0.8833	0.8421	0.7889	0.7574	0.7705	0.6836	0.6516	0.6068	0.5389	0.4779	0.4448	0.3986	0.3702	0.3273	0.294	0.2796	0.2815	0.2765	0.2576	0.2486	0.2481	0.229	0.2047	0.1836	0.1718	0.1669
17	HtMa / HtMa	young	b	C3A2	107.333	36.699	49.8898	18.733	9.1216	6.4769	4.2816	3.3857	2.9886	2.7284	2.4108	2.0757	1.8528	1.653	1.4213	1.2076	1.0745	0.9637	0.8503	0.7754	0.7222	0.695	0.7013	0.6712	0.6233	0.6018	0.571	0.5207	0.4905	0.4633	0.4234	0.3695	0.345	0.3248	0.3147	0.2923	0.2836	0.2935	0.2887	0.2695	0.2593	0.2519	0.2276	0.2034	0.1774
18	HtMa / HtMa	young	r	C3A2	98.3333	26.6252	39.7118	18.1667	11.459	9.1249	6.6762	5.5739	5.3556	5.469	5.3629	4.7009	4.1363	3.7745	3.764	3.2524	2.7853	2.4902	2.1931	1.9049	1.8504	1.798	1.6253	1.5057	1.3705	1.3374	1.2538	1.2124	1.1452	1.1246	1.0122	0.8592	0.7287	0.6296	0.508	0.4287	0.4007	0.3531	0.3126	0.2804	0.2628	0.2617	0.255	0.2234	0.2075
18	HtMa / HtMa	young	b	C3A2	101.333	32.8106	46.7433	18.5539	9.7337	7.0706	5.0359	3.817	3.7183	3.7778	3.5939	3.5518	3.2953	2.9687	2.5983	2.4342	2.2298	1.9778	1.7827	1.7278	1.626	1.5338	1.3439	1.2254	1.1701	1.111	1.0235	0.9664	0.9272	0.8858	0.8199	0.7109	0.6859	0.6217	0.5194	0.5275	0.4856	0.4072	0.3747	0.3598	0.3424	0.3512	0.3258	0.2691	0.2554
19	HtMa /HtMi	young	r	C3A2	83.6667	34.7726	53.8475	25.4149	16.5876	12.592	9.8375	7.6934	6.2974	5.1269	4.2011	3.6215	3.2886	2.9305	2.5441	2.3184	2.1147	1.9112	1.7906	1.6423	1.4817	1.3758	1.3681	1.3533	1.3152	1.3246	1.2687	1.2319	1.2711	1.205	1.2717	1.335	1.3015	1.2267	1.1595	1.05	0.9773	0.9191	0.7431	0.6407	0.5605	0.486	0.4006	0.3375	0.3029
19	HtMa /HtMi	young	b	C3A2	112.667	40.1937	62.0434	27.5456	15.8328	10.7813	8.2354	6.5384	5.5742	4.9879	4.371	4.0218	3.655	3.3618	3.001	2.678	2.4325	2.2064	2.0907	2.0088	1.9356	1.8861	1.7472	1.6345	1.559	1.4099	1.3375	1.3937	1.4237	1.4702	1.5364	1.5207	1.5052	1.4082	1.3053	1.2404	1.1698	1.0124	0.872	0.7366	0.6125	0.5239	0.4401	0.3616	0.3031
20	HtMa /HtMi	young	r	C3A2	73	39.1722	59.1027	34.9751	25.6972	18.7431	12.3145	10.4008	8.8356	7.8145	7.2996	7.1364	6.6183	6.0313	5.2832	5.0775	4.792	4.0029	3.4186	3.0737	2.8889	2.7517	2.5914	2.7322	2.7171	2.6508	2.6826	2.6524	2.4636	2.5896	2.6862	2.5007	2.3689	2.3225	2.2194	2.0603	1.9402	1.7713	1.5914	1.5654	1.4838	1.3345	1.2618	1.1882	1.0485
20	HtMa /HtMi	young	b	C3A2	99.3333	32.1897	55.6537	29.0783	20.2181	15.1793	10.7949	8.0702	7.1135	6.4643	6.0189	5.4217	4.7934	4.4326	3.9155	3.2971	3.2466	2.9415	2.7236	2.5699	2.2034	2.0754	2.0202	2.0057	2.0723	2.1739	2.3222	2.2313	2.1441	2.012	2.1223	2.115	1.9517	2.0762	1.9658	1.7946	1.691	1.6815	1.5695	1.5172	1.4637	1.3576	1.2814	1.0945	0.9739
21	HtMa /HtMi	young	r	C3A2	117.667	77.062	72.0071	11.8619	5.7739	4.2959	2.8364	2.5276	2.713	2.4229	2.0499	2.0372	1.9527	1.6989	1.57	1.5026	1.4311	1.3558	1.2838	1.1861	1.0628	0.936	0.8898	0.8113	0.6672	0.6052	0.5598	0.5156	0.485	0.4439	0.4348	0.4421	0.456	0.4919	0.5392	0.6034	0.6342	0.555	0.4517	0.3698	0.3177	0.2907	0.2639	0.2414	0.2323
21	HtMa /HtMi	young	b	C3A2	141	102.314	82.6685	12.2947	5.3112	3.6446	2.6663	2.1944	2.3623	2.6073	2.3682	2.0647	1.8852	1.7276	1.6397	1.5312	1.4017	1.4197	1.3587	1.2546	1.1816	1.0453	0.9176	0.764	0.6789	0.6067	0.5543	0.5173	0.4605	0.4383	0.4182	0.4024	0.4217	0.457	0.5078	0.5607	0.6222	0.6305	0.5518	0.4532	0.3716	0.3145	0.2863	0.257	0.2263
22	HtMa /HtMi	young	r	C3A2	84	24.4011	40.4134	22.5996	15.4596	12.3048	8.356	6.5107	5.7344	5.0887	4.5274	3.8164	3.4452	3.1048	2.6441	2.2007	1.9606	1.897	1.8441	1.6798	1.6176	1.5675	1.4138	1.2314	1.1181	1.0957	1.0734	1.0137	1.0066	0.9356	0.9701	0.9506	1.0074	0.9704	0.9105	0.7895	0.7125	0.6522	0.581	0.4763	0.4072	0.3527	0.306	0.2913	0.2561
22	HtMa /HtMi	young	b	C3A2	92	41.5959	52.6447	19.9341	11.506	8.5391	5.7172	4.6031	4.3001	3.8764	3.0769	2.6979	2.5236	2.194	1.9728	1.67	1.4673	1.4187	1.3909	1.3284	1.3222	1.2465	1.225	1.176	1.1316	1.0566	0.9861	1.014	1.0762	1.0927	1.0934	1.094	1.102	1.1392	1.1303	1.0355	0.9671	0.8592	0.7371	0.6134	0.5244	0.4477	0.3976	0.3388	0.297
23	HtMa /HtMi	young	r	C3A2	125	27.1286	39.6386	17.332	11.0519	7.1213	4.956	4.2382	3.9182	3.5954	3.1633	2.7139	2.5776	2.5162	2.337	2.1434	1.9116	1.718	1.6908	1.4485	1.2346	1.0757	0.9124	0.7705	0.6913	0.6262	0.5459	0.4784	0.4569	0.4109	0.3655	0.3412	0.3071	0.2835	0.249	0.221	0.2029	0.1888	0.173	0.1644	0.1582	0.1436	0.1363	0.1359	0.1261
23	HtMa /HtMi	young	b	C3A2	126	81.2341	94.1999	29.4411	13.8247	8.0882	5.4	4.2783	3.6119	3.1733	2.8893	2.503	2.3321	2.1964	1.9913	1.8346	1.6497	1.5327	1.3784	1.2986	1.2005	1.0261	0.8657	0.7192	0.638	0.5623	0.5151	0.4912	0.4374	0.399	0.3814	0.34	0.3163	0.2906	0.2604	0.2329	0.2291	0.2238	0.1988	0.1932	0.1779	0.176	0.159	0.1529	0.1517
24	HtMa /HtMi	young	r	C3A2	128	20.2387	34.9601	19.9382	13.8761	9.5405	6.4826	5.577	5.0197	4.8227	4.4108	3.9964	3.7196	3.5254	3.1316	2.7126	2.3486	2.0893	1.868	1.6629	1.5024	1.342	1.2447	1.1764	1.0988	1.039	0.9168	0.8454	0.7704	0.6874	0.6513	0.6281	0.6199	0.6094	0.5869	0.5997	0.5534	0.5116	0.474	0.4265	0.3713	0.3391	0.3065	0.2917	0.2727
24	HtMa /HtMi	young	b	C3A2	125.333	19.6548	31.7571	17.0129	10.6017	7.2928	5.939	4.8569	4.0045	3.638	3.3844	3.1404	2.8858	2.6692	2.4393	2.0924	1.7107	1.5297	1.3634	1.202	1.1145	1.0388	0.9113	0.8658	0.821	0.7766	0.6959	0.6534	0.6455	0.5702	0.545	0.5729	0.6141	0.6486	0.6668	0.6804	0.6727	0.6085	0.5751	0.5191	0.4493	0.3839	0.3525	0.3078	0.275
25	HtMa /HtMi	young	r	C3A2	95.6667	24.3013	35.1946	14.7146	8.9016	6.7478	4.5005	3.5019	3.2347	3.2099	3.0651	2.7497	2.485	2.2045	1.9333	1.8879	1.7696	1.6262	1.4817	1.3411	1.1936	1.1101	1.0419	1.015	0.9068	0.8405	0.7958	0.783	0.8129	0.7736	0.7213	0.6884	0.6763	0.6256	0.5748	0.5216	0.4801	0.4447	0.382	0.3261	0.3034	0.2683	0.2384	0.2168	0.2091
25	HtMa /HtMi	young	b	C3A2	111	20.1341	30.7737	13.4007	8.2845	6.0457	4.5778	3.6455	3.3688	3.4018	3.2445	2.9921	2.6115	2.2282	2.0946	1.9611	1.7433	1.6876	1.5807	1.4616	1.2565	1.107	1.0377	0.9658	0.9092	0.8664	0.8519	0.8285	0.8852	0.8923	0.8429	0.8077	0.86	0.872	0.8119	0.6826	0.5842	0.4942	0.4514	0.4101	0.3787	0.3395	0.3097	0.2914	0.281
26	HtMa / HtMa	young	r	C3A2	124	17.6229	27.0713	12.0019	8.0624	6.4901	5.129	4.0267	3.5783	3.3774	3.2778	2.9144	2.5864	2.5106	2.407	2.2441	2.0032	1.9154	1.8466	1.7388	1.7043	1.7798	1.8167	1.7389	1.6635	1.5321	1.2401	0.9907	0.8157	0.6658	0.5993	0.5514	0.5018	0.4947	0.4993	0.5089	0.5249	0.4716	0.42	0.4064	0.3845	0.3801	0.3749	0.3749	0.3795
26	HtMa / HtMa	young	b	C3A2	132.667	25.8674	36.1087	14.4776	8.7098	6.3048	4.4921	3.3161	2.7862	2.5887	2.4402	2.2289	2.0925	1.9456	1.8525	1.8082	1.6595	1.5273	1.4671	1.4968	1.5642	1.5372	1.6252	1.6438	1.5462	1.3188	1.118	0.9493	0.7761	0.6242	0.558	0.5271	0.5345	0.5551	0.5974	0.5655	0.5402	0.4783	0.4217	0.3861	0.3673	0.3595	0.3483	0.3318	0.3244
27	HtMa /HtMi	young	r	C3A2	98	27.91	38.8166	16.3985	9.8575	7.2129	5.6745	4.8229	4.6572	4.3904	4.0292	3.5774	3.3283	3.1759	2.8325	2.4971	2.1703	2.0549	1.8392	1.7331	1.7045	1.6415	1.5596	1.3706	1.2558	1.1294	1.0356	0.9466	0.8864	0.801	0.7646	0.6918	0.6421	0.6062	0.5558	0.5302	0.4981	0.4728	0.4569	0.4213	0.3907	0.3621	0.3492	0.3442	0.3491
27	HtMa /HtMi	young	b	C3A2	130.667	34.1735	49.7336	20.1492	9.4923	6.2009	4.4725	3.8396	3.5651	3.3237	2.9396	2.7376	2.6393	2.3335	2.0724	1.7606	1.5993	1.5472	1.5241	1.4455	1.3402	1.2705	1.2765	1.2413	1.1391	1.0177	0.9535	0.8413	0.7139	0.6912	0.6607	0.6335	0.6081	0.5466	0.5351	0.52	0.4794	0.4625	0.4573	0.4348	0.4085	0.3768	0.3524	0.3552	0.3471
90	HtMa /HtMi	young	r	C3A2	99.3333	20.088	30.4528	13.5741	8.8023	6.48353	4.28308	3.3587	3.09665	3.0155	2.63247	2.33507	2.0877	1.9371	1.82113	1.78977	1.72395	1.37627	1.22592	1.1232	0.98855	0.9088	0.864375	0.7925	0.7956	0.781875	0.777125	0.786475	0.883925	0.988225	1.06165	0.958625	0.702	0.52905	0.482125	0.412675	0.352525	0.33165	0.3113	0.2749	0.259075	0.2591	0.25885	0.228925	0.208975
90	HtMa /HtMi	young	b	C3A2	103	21.2258	25.3011	8.68525	4.67643	3.80088	2.72175	2.14078	1.89175	1.76812	1.57815	1.46657	1.47008	1.39625	1.22535	1.05527	0.956	0.88895	0.87065	0.791625	0.822875	0.808025	0.760075	0.742325	0.6825	0.66095	0.59855	0.5716	0.560925	0.539425	0.5204	0.517625	0.501425	0.465725	0.4326	0.39805	0.35925	0.35585	0.30945	0.265825	0.26195	0.239	0.219925	0.192025	0.187775
92	HtMi / HtMi	young	r	C3A2	72	14.7798	21.8972	9.39902	6.19402	4.54775	3.63615	3.17112	2.7586	2.61632	2.5415	2.11322	1.65417	1.43257	1.19788	1.14468	1.05563	0.99385	0.9526	0.977225	0.9715	0.942275	0.92735	0.91115	0.8672	0.773125	0.660525	0.589325	0.57395	0.558	0.532375	0.525875	0.526625	0.4749	0.438475	0.43615	0.418975	0.3662	0.3344	0.330025	0.314	0.289775	0.2807	0.27595	0.266875
92	HtMi / HtMi	young	b	C3A2	84	20.1786	25.2643	7.77665	4.8993	3.55895	3.13408	2.78682	2.3156	1.93525	1.7136	1.538	1.33422	1.22585	1.09783	0.924425	0.87365	0.83835	0.780825	0.8185	0.738675	0.712275	0.7065	0.6747	0.65735	0.6158	0.535075	0.497025	0.48525	0.4612	0.451925	0.463475	0.462975	0.46855	0.461125	0.45185	0.4146	0.406875	0.3743	0.34035	0.339575	0.345175	0.305025	0.2937	0.28545
94	HtMa /HtMi	young	r	C3A2	95.3333	25.2463	33.1382	13.0039	9.02458	7.00263	5.1538	4.47687	4.32728	4.08838	3.38673	2.90088	2.55925	2.3668	2.25707	2.3338	2.13305	1.99915	1.93968	1.85688	1.77822	1.65692	1.63825	1.5311	1.4025	1.42407	1.42375	1.6019	1.85563	1.732	1.63027	1.5768	1.3983	1.1527	0.8808	0.6706	0.612825	0.510975	0.41575	0.36135	0.311825	0.2744	0.249275	0.2246	0.20945
94	HtMa /HtMi	young	b	C3A2	130.667	20.3817	29.0993	13.4593	9.33727	6.46325	4.7719	3.9997	3.68228	3.44885	3.1301	2.8176	2.44665	2.1843	2.25122	2.13103	1.89033	1.8446	1.77755	1.68683	1.66555	1.63708	1.47972	1.39512	1.39498	1.38258	1.27585	1.23545	1.2635	1.22927	1.15082	1.1201	1.1184	1.0494	0.955075	0.82215	0.68215	0.586875	0.491475	0.4066	0.346025	0.308025	0.27795	0.24885	0.234475
97	HtMa / HtMa	young	r	C3A2	149.333	23.4169	30.0592	10.4853	6.29965	5.53627	4.4608	3.85173	3.90578	3.97475	3.9513	3.6812	3.20357	2.53172	2.16655	2.03788	1.8249	1.58343	1.53408	1.4239	1.40978	1.3934	1.33367	1.2492	1.11655	1.10405	1.16383	0.983775	1.02835	1.04015	0.934875	0.800925	0.655325	0.64275	0.583925	0.507925	0.493325	0.471075	0.435975	0.405225	0.3801	0.345225	0.306775	0.263	0.242575
97	HtMa / HtMa	young	b	C3A2	88.3333	22.8315	34.2358	13.0266	7.52248	6.2186	4.70418	3.68515	3.5655	3.75655	3.68777	3.6156	3.07138	2.46243	2.07857	1.94065	1.75828	1.66435	1.60363	1.49935	1.57987	1.62295	1.52115	1.47263	1.50073	1.52515	1.55612	1.74277	1.77818	1.5641	1.18912	1.20617	1.13465	0.8749	0.74645	0.715575	0.7098	0.682175	0.64195	0.581125	0.4963	0.39675	0.3717	0.33435	0.336175
99	HtMa / HtMa	young	r	C3A2	104	15.8339	20.1941	7.02963	3.90255	3.14405	2.53105	2.29248	2.29858	2.26403	2.08433	1.88688	1.71313	1.49737	1.17112	1.0088	0.95585	0.879725	0.828375	0.74965	0.7506	0.7078	0.639175	0.623975	0.57245	0.52205	0.483425	0.43415	0.416625	0.402625	0.35925	0.3386	0.34675	0.355425	0.372475	0.349225	0.3133	0.27245	0.240175	0.219925	0.198175	0.189775	0.171475	0.16055	0.14565
99	HtMa / HtMa	young	b	C3A2	98.6667	11.4178	16.459	7.00235	4.23227	3.35657	2.72222	2.45268	2.32823	2.27553	2.01745	1.93455	1.6248	1.3929	1.2472	1.14443	1.04693	1.0203	0.980575	0.943625	0.870475	0.892875	0.8087	0.702375	0.653525	0.592925	0.526975	0.507725	0.5051	0.455975	0.43645	0.432775	0.4559	0.486225	0.492625	0.4627	0.422425	0.37335	0.30695	0.257575	0.233475	0.210825	0.196575	0.174325	0.1586
101	HtMi / HtMi	young	r	C3A2	132.667	52.9483	76.948	25.9033	13.0955	10.5206	8.2806	5.30567	4.15168	3.68703	3.28638	3.04688	2.74845	2.33095	2.0873	2.0261	1.93918	1.7236	1.51575	1.27242	1.13843	1.0667	1.006	0.96315	0.934825	0.8667	0.79625	0.842525	0.8268	0.8024	0.809575	0.747125	0.71	0.697825	0.64425	0.5636	0.523225	0.45285	0.3923	0.36125	0.319625	0.288375	0.277325	0.256625	0.237375
101	HtMi / HtMi	young	b	C3A2	112.333	18.1609	25.8579	11.4607	8.10515	7.10645	6.07873	4.44925	3.56498	3.49262	3.28428	2.97273	2.5894	2.25617	1.96985	1.8141	1.56163	1.40233	1.33325	1.23168	1.13135	1.06088	1.0385	1.03897	0.928775	0.8373	0.829975	0.850725	0.78755	0.769525	0.739375	0.7658	0.716475	0.62505	0.5637	0.48485	0.429725	0.382325	0.34625	0.305275	0.282875	0.259925	0.23655	0.219525	0.21335
108	HtMa /HtMi	young	r	C3A2	126.333	25.7443	35.8189	16.4333	12.6234	8.04932	6.60125	6.0604	5.29192	5.27377	5.27635	4.81937	4.2035	3.40077	3.18522	2.88112	2.6413	2.37758	2.29493	2.11967	1.96297	1.79895	1.71453	1.48818	1.27925	1.17778	1.11058	1.0088	0.948325	0.920625	0.86965	0.86415	0.7997	0.753725	0.710825	0.6482	0.566425	0.4981	0.43405	0.380975	0.3316	0.2892	0.265275	0.249	0.23265
108	HtMa /HtMi	young	b	C3A2	99.3333	24.8724	35.5424	16.1486	9.56822	6.2449	5.04307	4.57723	4.56083	4.56508	4.45528	4.10778	3.8775	3.31053	2.85633	2.6855	2.5228	2.4655	2.21042	2.08067	1.90437	1.87765	1.742	1.6133	1.4111	1.2331	1.09343	0.9894	0.957475	0.9944	1.02805	1.03527	1.03048	0.974225	0.908075	0.764625	0.6196	0.55855	0.498025	0.42155	0.361	0.324825	0.29155	0.26175	0.247
115	HtMa / HtMa	young	r	C3A2	114.333	25.1132	35.2865	13.5802	6.7695	4.74373	4.2962	3.80068	3.36393	3.38512	3.3999	3.12495	2.87102	2.55302	2.2086	1.96202	1.7674	1.66003	1.5198	1.41158	1.28123	1.22683	1.15552	1.09302	1.0394	0.971775	0.921225	0.826775	0.7799	0.71205	0.629	0.5898	0.58095	0.551925	0.544875	0.5527	0.5638	0.52465	0.52685	0.471275	0.44825	0.421975	0.364075	0.32305	0.313375
115	HtMa / HtMa	young	b	C3A2	103.333	18.4219	25.3417	10.5677	6.48175	4.1148	3.46125	3.08347	2.66582	2.67235	2.48935	2.4139	2.41805	2.00762	1.7165	1.53428	1.3869	1.36472	1.3285	1.2725	1.2179	1.21493	1.16108	1.12417	1.1131	0.997825	0.89025	0.86235	0.804475	0.713625	0.6767	0.651725	0.6682	0.68105	0.69615	0.77415	0.75595	0.65555	0.684275	0.656175	0.5599	0.49305	0.425675	0.39065	0.353525
119	HtMa / HtMa	young	r	C3A2	100.333	24.5952	32.2011	10.8539	7.00247	5.91995	4.39893	3.73427	3.64215	3.29818	3.54982	4.17665	4.2068	3.94125	3.77615	3.395	2.97927	2.28757	2.06625	1.73972	1.54325	1.56185	1.38213	1.2049	1.03687	0.885425	0.82555	0.7679	0.72135	0.73275	0.804975	0.808525	0.5802	0.354725	0.309025	0.268	0.2489	0.235025	0.224925	0.2135	0.194225	0.1756	0.1651	0.160075	0.150625
119	HtMa / HtMa	young	b	C3A2	117.667	19.1467	24.655	8.65355	5.6825	4.36017	3.29125	2.92822	2.69335	2.3288	2.21747	2.18075	2.1356	2.0112	1.87112	1.67958	1.59118	1.5053	1.40067	1.30468	1.22043	1.16742	0.978775	0.863125	0.795525	0.7084	0.62825	0.53125	0.46495	0.41195	0.361475	0.31055	0.2918	0.268725	0.2456	0.2276	0.2315	0.223175	0.202675	0.1997	0.181525	0.1692	0.153975	0.14875	0.148025
129	HtMa / HtMa	young	r	C3A2	54.6667	20.102	25.2498	8.23975	5.30145	4.00357	2.98007	3.20217	3.11963	2.5829	2.53658	2.11503	1.79337	1.62265	1.3985	1.33745	1.29798	1.12458	0.985475	0.877775	0.898825	0.784075	0.67905	0.6625	0.60565	0.535175	0.4577	0.407325	0.3932	0.36725	0.35955	0.33975	0.311925	0.265275	0.244625	0.211375	0.174175	0.16215	0.1581	0.146925	0.1512	0.134025	0.11845	0.1072	0.100425
129	HtMa / HtMa	young	b	C3A2	90	14.2075	19.2774	8.52603	5.31658	3.7807	3.12248	3.10565	3.04208	2.86805	2.66803	2.29965	1.90195	1.65158	1.51917	1.34177	1.31015	1.30917	1.1406	1.22525	1.27093	1.19447	1.0752	0.95705	0.826725	0.80005	0.733525	0.59095	0.523325	0.4697	0.436075	0.42575	0.41765	0.336775	0.288325	0.2413	0.2235	0.203825	0.180475	0.1745	0.155675	0.13775	0.1264	0.115775	0.108675
131	HtMa / HtMa	young	r	C3A2	96.6667	14.178	22.1903	9.0552	5.90808	5.18255	4.14185	3.59687	3.40172	3.36175	3.47242	3.1469	2.77398	2.39392	2.05812	1.91515	1.6622	1.58058	1.47358	1.35147	1.18298	1.06045	0.97405	0.935225	0.8303	0.7988	0.763525	0.69105	0.63755	0.591875	0.57035	0.54015	0.5149	0.4606	0.40765	0.375775	0.350175	0.2859	0.2397	0.21685	0.208	0.185075	0.167025	0.1557	0.141325
131	HtMa / HtMa	young	b	C3A2	106	15.9521	24.7764	10.1115	6.60085	4.65665	3.3549	3.21378	3.19203	2.90143	2.5917	2.44635	2.24693	1.94925	1.71335	1.54117	1.4188	1.39465	1.2121	1.15895	1.13472	1.06408	1.01012	1.00077	0.8801	0.816775	0.7594	0.705775	0.654925	0.605675	0.5735	0.5335	0.51875	0.4932	0.446925	0.38055	0.3331	0.292975	0.2433	0.21545	0.188325	0.16905	0.15155	0.1374	0.128775
132	HtMa / HtMa	young	r	C3A2	91.3333	12.2216	19.2862	10.9474	8.37017	6.79427	5.00023	4.13045	3.91337	3.6629	3.27827	2.77352	2.57275	2.34742	1.9134	1.82212	1.61495	1.49575	1.4157	1.3135	1.2459	1.06478	0.97925	0.8539	0.795775	0.726275	0.657525	0.64055	0.56025	0.5089	0.4607	0.439575	0.42875	0.401575	0.352025	0.318925	0.293925	0.2814	0.257775	0.231125	0.20855	0.194575	0.18265	0.17345	0.1658
132	HtMa / HtMa	young	b	C3A2	104.333	10.8701	17.7395	10.5811	7.29293	5.70595	4.3222	3.53135	3.3496	3.0268	2.7022	2.9107	2.65223	2.28845	2.07938	1.9269	1.78658	1.65855	1.55753	1.52405	1.42925	1.2545	1.17388	1.07925	0.99605	0.868625	0.7459	0.6753	0.642175	0.603175	0.559825	0.5038	0.53955	0.5158	0.4547	0.419125	0.38225	0.371975	0.326675	0.29535	0.264725	0.24185	0.227625	0.200575	0.186925
134	HtMa / HtMa	young	r	C3A2	133.667	26.1885	34.7421	12.0249	5.23275	3.87807	2.7724	2.19822	2.04383	1.99855	1.66552	1.5574	1.5709	1.44322	1.41532	1.4564	1.46942	1.31072	1.11725	1.02995	0.985275	0.858925	0.78545	0.759775	0.751175	0.747825	0.674575	0.6313	0.62565	0.69725	0.780325	0.83325	0.86965	0.90675	0.8837	0.8508	0.8223	0.721325	0.646075	0.55075	0.452725	0.394975	0.34445	0.2938	0.249575
134	HtMa / HtMa	young	b	C3A2	104	22.4666	26.9301	9.20008	5.0513	3.79657	2.70642	2.23913	2.0473	1.94695	1.7153	1.62817	1.5026	1.32088	1.19007	1.07567	1.01703	0.95515	0.9092	0.85875	0.83035	0.833425	0.81085	0.77045	0.7517	0.760625	0.70695	0.66275	0.70735	0.732175	0.780975	0.90115	1.01937	1.09722	1.2238	1.31472	1.47535	1.5044	1.4349	1.26175	1.00073	0.76145	0.533325	0.387725	0.297575
136	HtMa /HtMi	young	r	C3A2	117.333	38.8909	53.3857	28.48	20.9055	15.3161	11.8308	8.8417	7.55465	6.79002	6.50017	6.40675	5.68407	5.02658	4.65475	4.28217	3.69552	3.0878	2.64312	2.5247	2.24202	2.18158	2.13523	1.92988	1.7963	1.65663	1.64942	1.67965	1.60833	1.47837	1.39403	1.2104	1.00927	0.814	0.643	0.54655	0.468325	0.39125	0.332675	0.2866	0.25315	0.227225	0.204525	0.18895	0.176475
136	HtMa /HtMi	young	b	C3A2	90.3333	31.2403	40.3934	19.9191	14.9182	10.6042	7.72157	5.8671	5.05698	4.6736	4.07362	3.65557	3.64225	3.5679	3.20713	2.88868	2.46723	2.28405	2.05077	2.0053	1.97008	1.7897	1.59648	1.46382	1.4409	1.34482	1.23253	1.1224	1.07892	1.15772	1.15278	1.06678	0.954125	0.8041	0.6815	0.550075	0.447775	0.383775	0.337075	0.3041	0.275525	0.235425	0.20535	0.18985	0.170025
149	HtMa /HtMi	young	r	C3A2	90.3333	15.281	23.7868	10.3788	6.39773	5.18898	4.03188	3.09497	2.9876	3.06692	2.89043	2.70308	2.51083	2.24147	1.99463	1.8747	1.84163	1.69328	1.5652	1.54957	1.40978	1.2336	1.13095	1.07905	0.9844	0.845725	0.837225	0.755375	0.6655	0.58675	0.54435	0.476625	0.40395	0.344625	0.3263	0.3071	0.27745	0.2758	0.2644	0.2518	0.229175	0.2304	0.22785	0.2093	0.20525
149	HtMa /HtMi	young	b	C3A2	105	17.9494	23.929	9.6483	5.81877	4.72095	3.9004	3.20087	3.0555	2.76857	2.93005	2.77835	2.3191	2.1618	1.9515	1.77382	1.7131	1.59167	1.55943	1.5694	1.4366	1.3201	1.0294	0.97475	0.90725	0.8061	0.76745	0.7306	0.678675	0.58965	0.529675	0.4538	0.341275	0.3204	0.286025	0.260575	0.269925	0.26475	0.241025	0.22645	0.25905	0.24885	0.209075	0.188	0.19095
153	HtMa /HtMi	young	r	C3A2	80	25.9659	37.9768	15.2671	9.43645	8.02782	6.01875	5.22813	5.05875	4.84863	4.51602	4.2866	4.1073	3.8855	3.54833	3.26202	3.02117	2.7925	2.41098	2.35447	2.1702	1.899	1.81462	1.6602	1.50275	1.35573	1.20685	1.02135	0.999625	0.902575	0.843475	0.725775	0.6402	0.625	0.5783	0.543975	0.50825	0.491825	0.464575	0.426025	0.3805	0.361025	0.3362	0.321225	0.303
153	HtMa /HtMi	young	b	C3A2	97.6667	21.7935	30.8246	12.7681	7.3732	5.82503	4.8372	4.69123	4.57022	4.20732	3.97993	3.64245	3.28072	3.20677	2.96037	2.76733	2.76003	2.52953	2.2517	2.13428	2.18803	2.02172	1.85597	1.62235	1.54103	1.3982	1.2418	1.0669	1.00875	0.914125	0.8359	0.741275	0.711375	0.651425	0.614925	0.5895	0.5487	0.541175	0.509275	0.455725	0.42645	0.43035	0.39615	0.361075	0.323
160	HtMa / HtMa	young	r	C3A2	39	19.4104	34.3448	18.3921	11.9949	8.81105	5.46012	4.51178	4.51835	4.04462	3.5123	3.06215	2.87153	2.58145	2.3782	2.4372	2.66852	2.59835	2.25935	1.89043	1.7548	1.58042	1.33963	1.23503	1.18863	1.09455	1.05005	1.0572	1.07997	1.01838	1.04258	1.13108	1.21558	1.1103	0.9014	0.80785	0.6278	0.53935	0.485275	0.38325	0.32265	0.296725	0.268675	0.2409	0.213425
160	HtMa / HtMa	young	b	C3A2	100	12.4389	19.2377	11.8155	8.9447	7.057	5.40785	4.51425	3.62922	3.0098	2.71338	2.54805	2.2578	1.96865	1.92487	1.84595	1.72327	1.7372	1.64455	1.51218	1.37652	1.1957	1.17178	1.0926	0.985675	0.9969	0.937825	0.936225	0.97365	1.04642	1.20437	1.22185	1.15325	1.12817	1.07892	0.98195	0.806575	0.642775	0.5494	0.45485	0.380975	0.335175	0.3136	0.27715	0.241025
162	HtMa /HtMi	young	r	C3A2	103	18.606	23.5728	9.1184	5.56255	4.16408	3.1931	2.67897	2.59278	2.25515	2.10177	1.7682	1.58062	1.48127	1.26077	1.0883	1.021	0.967475	0.8908	0.880175	0.8385	0.784725	0.74995	0.703825	0.6312	0.61305	0.5953	0.556475	0.5143	0.4836	0.477025	0.4706	0.497575	0.532	0.564825	0.5076	0.43815	0.386625	0.322875	0.2981	0.282875	0.26555	0.2393	0.224425	0.20045
162	HtMa /HtMi	young	b	C3A2	61	31.5932	41.6311	12.7204	7.6927	4.89727	3.99363	3.29327	2.66032	2.0481	1.81375	1.77125	1.60165	1.49863	1.28547	1.05615	0.9367	0.97295	0.9472	0.882125	0.770875	0.741675	0.7213	0.733625	0.673575	0.613	0.66315	0.6352	0.515325	0.507975	0.506625	0.53965	0.567875	0.660675	0.67695	0.69245	0.535375	0.524975	0.50105	0.442575	0.34925	0.28615	0.27765	0.251075	0.24545
170	HtMi / HtMi	young	r	C3A2	62.3333	20.4795	30.4156	14.6306	10.7404	10.6864	7.95218	5.28873	5.39428	5.70148	6.0172	6.01107	5.21572	4.5474	4.29523	3.58565	3.15105	2.90218	2.52913	2.1234	1.9368	1.6826	1.52062	1.43433	1.31288	1.22313	1.1494	1.1879	1.31803	1.32305	1.3259	1.14423	0.9681	0.840325	0.667625	0.5989	0.542175	0.423	0.38515	0.329025	0.328675	0.30765	0.2814	0.289475	0.281325
170	HtMi / HtMi	young	b	C3A2	102.667	18.522	24.1106	10.324	7.44085	7.02717	5.75225	4.71723	4.68215	4.8545	4.6821	4.3999	4.09745	4.15397	3.7911	3.10635	2.80273	2.56865	2.22625	2.11532	1.92515	1.71215	1.62165	1.45358	1.22212	1.12065	1.0533	0.985175	0.9024	0.87905	0.8911	0.7807	0.706	0.61105	0.5346	0.48385	0.44555	0.426925	0.3922	0.3675	0.3451	0.322125	0.317	0.287275	0.2556
178	HtMa /HtMi	young	r	C3A2	117.333	9.2062	15.2747	11.9647	6.3252	4.9753	4.1677	3.6515	3.499	3.6833	3.8532	3.6608	3.4374	3.0413	2.8021	2.6365	2.4247	2.215	2.0488	1.9709	1.9848	2.009	1.9635	1.9432	1.8085	1.709	1.6478	1.6084	1.5091	1.3734	1.2842	1.1207	0.971	0.864	0.778	0.6586	0.5817	0.5329	0.4744	0.4531	0.443	0.4043	0.3702	0.3574	0.3437
178	HtMa /HtMi	young	b	C3A2	113	9.6379	15.7523	12.2285	6.2125	4.6377	3.8141	3.0972	2.9911	2.8235	3.0234	3.1204	2.8277	2.6184	2.382	2.1353	1.893	1.8275	1.7717	1.7079	1.6045	1.6094	1.6146	1.5903	1.5048	1.3981	1.2948	1.2689	1.2326	1.1231	1.0002	0.9039	0.7494	0.621	0.5634	0.4679	0.3935	0.3451	0.3058	0.2811	0.2496	0.2233	0.2023	0.1796	0.1699
186	HtMa / HtMa	young	r	C3A2	98.3333	13.3788	22.3487	19.1795	11.658	8.6087	5.9793	4.5158	4.0798	4.1663	3.9917	3.5583	3.3494	2.9928	2.7903	2.6223	2.6627	2.6241	2.3787	2.0996	2.0593	1.8549	1.8186	1.8384	2.0252	2.0717	2.4013	3.2909	3.7658	3.5	3.0208	2.5912	2.3512	1.8979	1.6889	1.4202	1.0876	0.8344	0.7298	0.587	0.4975	0.4512	0.3808	0.3294	0.3174
186	HtMa / HtMa	young	b	C3A2	102.667	11.053	19.4519	17.726	10.248	7.8061	6.1005	4.419	3.8249	3.7107	3.4745	3.0862	2.9334	2.8469	2.6258	2.4111	2.3187	2.2552	2.1603	2.0854	1.9911	1.929	1.9336	1.9563	2.0122	2.0437	2.121	2.3738	2.611	2.6787	2.5269	2.4251	2.2652	2.1049	1.8728	1.5198	1.2247	1.0419	0.8717	0.7429	0.6302	0.5448	0.4861	0.4307	0.3656
192	HtMa /HtMi	young	r	C3A2	24.6667	13.3471	26.6724	34.8657	29.9137	21.2913	16.2973	13.5509	10.6487	8.7767	6.4082	5.3536	4.7653	4.139	3.4507	3.14	2.718	2.4147	2.3312	2.2742	1.9871	1.7444	1.8146	1.5755	1.2993	1.3334	1.3529	1.3062	1.2286	1.1323	1.2214	1.2414	1.1874	1.0114	0.8196	0.8481	0.9412	0.9604	0.8379	0.6393	0.6031	0.547	0.5028	0.406	0.3915
192	HtMa /HtMi	young	b	C3A2	60.6667	12.0734	24.661	31.3774	26.5562	19.5971	13.7287	10.8742	9.326	7.724	5.8898	4.4943	3.6883	3.0561	2.7499	2.7249	2.3076	2.1296	2.039	2.0036	2.0318	1.8237	1.6218	1.5081	1.3708	1.2666	1.2962	1.3189	1.2449	1.2188	1.2865	1.3264	1.3275	1.3255	1.3469	1.3453	1.2446	1.1426	1.0279	0.8753	0.7254	0.6396	0.5456	0.4717	0.4295
199	HtMa / HtMa	young	r	C3A2	142.667	10.3742	16.7023	15.0789	10.7028	7.9954	6.4762	5.4375	4.8512	4.5232	3.9365	3.4469	3.3543	2.8684	2.6123	2.3844	2.1771	2.1558	2.0365	1.9909	1.864	1.8437	1.8786	1.8996	1.955	1.885	1.8111	1.8139	1.7378	1.7942	1.9792	2.0488	2.3414	2.3289	2.3784	2.4274	2.4872	2.1509	1.8975	1.6804	1.406	1.1178	0.9226	0.8239	0.7674
199	HtMa / HtMa	young	b	C3A2	120.333	10.96	18.2333	14.3687	8.0553	5.9106	4.8356	4.246	3.8267	3.5907	3.2553	2.9356	2.4837	2.0947	1.8326	1.7514	1.7258	1.613	1.5231	1.5182	1.4282	1.3922	1.3857	1.3932	1.3696	1.3065	1.2968	1.3222	1.3312	1.3608	1.4826	1.6154	1.8889	2.3384	2.5646	2.7262	2.4986	2.0656	1.7264	1.4649	1.2535	1.0491	0.933	0.7833	0.6461
202	HtMa / HtMa	young	r	C3A2	94	7.5984	12.3058	9.323	4.296	3.2538	2.7397	2.2175	2.107	2.1777	2.3227	2.3717	2.4812	2.3468	2.2352	2.2078	2.0205	1.6879	1.5004	1.4228	1.2936	1.1187	0.9756	0.8289	0.7746	0.6475	0.5634	0.5183	0.4578	0.4272	0.4122	0.3723	0.3194	0.2966	0.2805	0.2684	0.2408	0.224	0.198	0.1866	0.1709	0.1626	0.1542	0.1476	0.1352
202	HtMa / HtMa	young	b	C3A2	94.6667	6.7563	11.7933	9.4124	4.6308	3.5154	2.4687	1.8107	1.7381	1.7746	1.7329	1.5791	1.5275	1.5372	1.4878	1.3972	1.2953	1.1855	1.0233	0.982	0.9886	0.8569	0.7434	0.6956	0.6406	0.5891	0.5702	0.499	0.4942	0.4652	0.4531	0.4479	0.4216	0.4197	0.3839	0.3586	0.3514	0.3298	0.2846	0.2578	0.2366	0.2207	0.1831	0.17	0.1583
222	HtMa /HtMi	young	r	C3A2	60.3333	4.3404	8.2224	8.5793	6.8127	5.621	4.014	3.3875	3.5843	3.439	2.8917	2.3928	2.1638	2.0496	1.8231	1.5372	1.4532	1.4922	1.4864	1.4079	1.2634	1.2193	1.1154	1.1346	1.0937	1.1039	1.1355	1.157	1.1493	1.1956	1.2657	1.3214	1.3909	1.5393	1.6983	1.3936	1.0872	0.8366	0.6381	0.507	0.445	0.3874	0.3401	0.309	0.2876
222	HtMa /HtMi	young	b	C3A2	79	5.6239	10.2291	10.1878	7.0734	5.2724	3.9075	3.1805	3.0022	2.6298	2.3024	2.113	1.921	1.6313	1.3611	1.2469	1.3051	1.3383	1.2929	1.2571	1.2185	1.258	1.2434	1.1674	1.2231	1.3438	1.3893	1.4334	1.524	1.5699	1.5075	1.4666	1.4636	1.4672	1.3291	1.0953	0.9494	0.7929	0.6536	0.5843	0.4782	0.3825	0.3673	0.3454	0.3082
226	HtMa / HtMa	young	r	C3A2	119.333	7.853	13.9079	13.1	8.3145	6.5413	5.2255	4.472	3.8168	3.7396	3.5435	3.4763	3.3598	3.1882	2.9054	2.4162	2.1671	1.9851	1.8883	1.7386	1.6006	1.575	1.4926	1.4108	1.3107	1.2054	1.1741	1.0824	1.006	0.9164	0.8777	0.8421	0.7944	0.7596	0.714	0.6766	0.6544	0.6234	0.5822	0.5451	0.5278	0.4974	0.4846	0.4774	0.4508
231	HtMa /HtMi	young	r	C3A2	80.3333	6.6399	11.1302	9.2346	5.3439	4.3685	3.2936	2.6033	2.4639	2.3712	2.1549	1.8412	1.7536	1.6292	1.5212	1.4036	1.2724	1.1447	1.1294	1.0405	1.006	0.9889	0.9075	0.8908	0.8898	0.8544	0.8053	0.8036	0.905	0.9243	0.9268	0.9083	0.7704	0.63	0.5762	0.5261	0.4597	0.4193	0.4177	0.3883	0.3472	0.3197	0.3005	0.2636	0.2403
231	HtMa /HtMi	young	b	C3A2	77	5.6977	10.828	9.6271	5.2264	3.2669	2.4653	2.1349	1.9941	1.7625	1.6486	1.531	1.3839	1.3111	1.1549	1.0581	0.9495	0.9258	0.8738	0.8379	0.8037	0.7758	0.7942	0.7723	0.7636	0.7753	0.7776	0.829	0.9225	0.9026	0.9054	0.8829	0.8143	0.7827	0.7376	0.6651	0.6398	0.5915	0.5134	0.4533	0.3929	0.3715	0.3171	0.2746	0.2298
232	HtMa / HtMa	young	r	C3A2	89.6667	9.0135	17.8926	19.6673	16.3163	13.276	9.755	7.4391	7.2115	6.8548	5.7853	5.1275	4.6761	4.1468	3.4593	2.9178	2.4469	2.1327	1.973	1.7856	1.6791	1.5925	1.5552	1.4269	1.3818	1.2846	1.1939	1.1434	1.0175	0.9111	0.8056	0.7019	0.6278	0.5566	0.4681	0.4062	0.3764	0.3352	0.3187	0.2969	0.2741	0.2492	0.2236	0.2076	0.2045
232	HtMa / HtMa	young	b	C3A2	97.3333	9.4116	17.8199	18.5936	13.0156	9.6306	7.4669	6.0505	5.5582	5.2391	4.5887	4.0403	3.5349	3.1622	2.9502	2.4984	2.0793	1.8545	1.7083	1.5607	1.4907	1.4599	1.5044	1.3706	1.3472	1.2113	1.0982	1.0334	0.9232	0.8542	0.7822	0.7218	0.6369	0.548	0.4834	0.4436	0.4114	0.385	0.3541	0.3325	0.306	0.2812	0.2545	0.2129	0.2051
234	HtMa / HtMa	young	r	C3A2	132	22.0418	32.0604	20.0981	13.0896	17.6752	7.9103	3.6664	4.1005	4.6799	3.6753	3.2742	3.1049	2.7665	2.0921	1.7162	1.5697	1.4505	1.3615	1.1501	1.1198	1.139	1.1381	1.106	1.1065	1.1192	1.054	1.0197	1.0073	0.9907	0.8864	0.8112	0.8202	0.7491	0.6243	0.5728	0.5271	0.4895	0.4665	0.4293	0.389	0.4214	0.4438	0.4104	0.3988
234	HtMa / HtMa	young	b	C3A2	98.6667	10.9656	17.7547	13.7474	7.3746	5.4085	3.7386	3.1129	2.634	2.4036	2.228	2.3136	2.3536	1.9831	1.6294	1.383	1.318	1.2239	1.1581	1.0423	0.9286	0.9193	0.8955	0.8684	0.8545	0.8874	0.889	0.8295	0.8035	0.7857	0.7728	0.7216	0.7053	0.6684	0.632	0.598	0.5833	0.5422	0.4785	0.4812	0.4725	0.4449	0.4363	0.4423	0.442
239	HtMa /HtMi	young	r	C3A2	34.6667	13.0834	25.3774	24.7332	14.3531	11.5981	9.0766	7.4963	6.4647	6.2505	5.4167	4.1468	3.4652	2.9661	3.046	3.0384	2.5944	2.5989	2.4183	2.0999	1.7013	1.6101	1.6273	1.6274	1.4441	1.2158	1.1438	1.0957	0.9668	0.8405	0.8311	0.7774	0.7633	0.7564	0.7448	0.714	0.6895	0.6198	0.6144	0.5592	0.5026	0.4614	0.4336	0.409	0.3674
239	HtMa /HtMi	young	b	C3A2	62.6667	14.439	26.5834	23.9728	13.6595	9.43	7.0903	5.9016	5.7477	5.2703	4.9341	4.2759	3.3289	2.9547	2.5316	2.284	2.2345	2.0658	2.0354	2.08	1.9517	1.7931	1.6973	1.6163	1.3977	1.2054	1.1093	1.0369	0.9848	0.8799	0.9109	0.9752	1.0033	0.997	0.9503	0.9227	0.8679	0.8173	0.7554	0.6873	0.6399	0.5545	0.484	0.4229	0.4129
244	HtMa / HtMa	young	r	C3A2	60	16.5401	27.179	21.5191	13.3667	10.0743	7.8424	6.7391	6.3089	6.0499	5.9051	6.1739	6.094	4.6963	3.5907	2.921	2.7202	2.4078	2.0757	1.9117	1.7955	1.5059	1.2939	1.235	1.1511	1.0442	1.005	0.8711	0.9188	0.9074	0.8265	0.7305	0.6485	0.561	0.505	0.5204	0.4352	0.3975	0.4023	0.3361	0.2841	0.2875	0.2567	0.2409	0.2456
244	HtMa / HtMa	young	b	C3A2	48.3333	12.7512	20.3791	16.372	9.4647	7.4641	5.9265	4.7978	5.0249	4.4037	4.1617	4.4647	3.828	3.5412	2.9331	2.5185	2.2416	1.9653	1.7059	1.6469	1.4717	1.3071	1.18	1.18	1.074	1.0376	0.9881	0.9348	0.9087	0.9006	0.7069	0.7929	0.7933	0.7991	0.7078	0.7118	0.7094	0.5934	0.4604	0.3867	0.3348	0.2909	0.2728	0.2537	0.2499
257	HtMa / HtMa	young	r	C3A2	80.3333	10.2155	18.205	17.0111	12.4117	10.1388	6.7834	4.9737	4.4747	3.9934	3.7523	3.5386	2.7972	2.4694	2.2534	2.0071	1.7954	1.5678	1.4068	1.3489	1.265	1.1522	1.1097	1.0168	0.9481	0.815	0.7622	0.6988	0.6211	0.5859	0.5554	0.5022	0.4765	0.4357	0.3481	0.293	0.2875	0.2747	0.2517	0.2145	0.1923	0.1792	0.1742	0.1687	0.1534
257	HtMa / HtMa	young	b	C3A2	79	10.4204	18.9234	17.7349	10.8873	7.3671	5.2087	4.181	3.7589	3.1797	2.8779	2.4719	2.3399	2.0738	1.7316	1.5273	1.4771	1.3444	1.3174	1.1474	1.1008	0.9674	0.8696	0.8288	0.7536	0.7204	0.6824	0.5984	0.5654	0.4955	0.4999	0.4619	0.4112	0.409	0.365	0.3432	0.3169	0.3139	0.2767	0.2308	0.2217	0.2133	0.1996	0.1883	0.172
275	HtMa /HtMi	young	r	C3A2	125.667	8.6366	13.9595	10.688	6.4222	5.2282	3.6484	3.3534	3.4151	3.1855	2.6867	2.2986	2.1197	1.9517	1.7209	1.6169	1.5043	1.345	1.177	1.0619	0.967	0.8865	0.8214	0.7165	0.6813	0.6701	0.6524	0.6208	0.6217	0.6331	0.5917	0.6041	0.6153	0.5307	0.4076	0.3586	0.3233	0.2776	0.246	0.2239	0.2066	0.1807	0.1693	0.1583	0.136
275	HtMa /HtMi	young	b	C3A2	93.3333	8.3144	13.9714	11.3762	6.4812	4.3573	3.2596	3.0133	2.7991	2.5486	2.402	2.1038	1.8072	1.6196	1.4233	1.2106	1.0363	0.9755	0.9443	0.8767	0.8284	0.7648	0.704	0.6598	0.6357	0.5919	0.5442	0.503	0.5148	0.5074	0.4759	0.4384	0.4096	0.3909	0.3554	0.3217	0.3001	0.2926	0.273	0.2385	0.2275	0.1962	0.167	0.1552	0.1406
278	HtMa / HtMa	young	r	C3A2	105.333	6.1247	9.4366	7.0109	4.2157	3.5142	2.5629	2.213	2.2262	2.1553	1.8433	1.6551	1.5408	1.426	1.3093	1.2123	1.2278	1.2221	1.1194	1.0595	1.0093	0.956	0.8697	0.7526	0.6853	0.6691	0.6321	0.6183	0.6317	0.6136	0.6202	0.5818	0.5521	0.5157	0.4544	0.3582	0.2911	0.2518	0.2275	0.2199	0.1961	0.1774	0.165	0.1498	0.1442
278	HtMa / HtMa	young	b	C3A2	102.333	4.1091	7.1389	6.6355	4.6699	3.8812	2.3588	1.9371	1.9337	1.7813	1.5107	1.3607	1.3119	1.2134	1.0748	1.0106	1.0059	0.9825	0.9567	0.8741	0.8344	0.7629	0.6736	0.6447	0.6168	0.5745	0.5543	0.5413	0.5668	0.5429	0.5398	0.5083	0.4818	0.4353	0.4271	0.3767	0.3193	0.2808	0.2523	0.2218	0.2058	0.1953	0.1816	0.1657	0.149
280	HtMi / HtMi	young	r	C3A2	98	12.5737	21.7638	18.3499	11.5455	9.3354	6.8102	6.1056	5.9022	6.1603	5.535	4.8218	4.1094	3.589	3.1197	2.6528	2.3781	2.2147	2.0888	2.0079	1.7903	1.5606	1.4436	1.2203	1.0161	0.9249	0.8467	0.7785	0.7156	0.6433	0.6618	0.6231	0.5857	0.5532	0.5155	0.4901	0.4403	0.4278	0.3851	0.3668	0.3574	0.3195	0.2974	0.2843	0.2447
280	HtMi / HtMi	young	b	C3A2	86.6667	8.8856	14.9188	12.7085	7.6071	6.1156	4.9343	4.4263	4.351	3.8537	3.5508	3.2155	2.705	2.2007	1.889	1.6282	1.4614	1.435	1.2977	1.3746	1.5862	1.6343	1.3952	1.0235	0.7681	0.7024	0.6048	0.5788	0.5497	0.5453	0.5234	0.5132	0.5252	0.5435	0.5466	0.473	0.4214	0.3909	0.395	0.3553	0.3591	0.3416	0.3262	0.3014	0.2401
305	HtMa /HtMi	young	r	C3A2	69.6667	15.0093	24.4446	10.8441	6.2435	4.6086	3.5509	3.0701	2.7035	2.4927	2.446	2.4278	2.3923	2.0874	1.6297	1.4034	1.3182	1.2908	1.3379	1.3252	1.3001	1.2229	1.0794	0.9317	0.8919	0.8041	0.7352	0.6944	0.7019	0.7066	0.638	0.6477	0.6945	0.6889	0.6587	0.7121	0.728	0.6765	0.6835	0.654	0.5667	0.5055	0.4319	0.414	0.4068
305	HtMa /HtMi	young	b	C3A2	99.6667	18.6102	23.3217	8.5752	5.3328	3.9158	3.1024	2.4961	2.3337	2.04	1.9794	1.9606	1.7701	1.4262	1.2426	1.073	0.963	1.0368	1.0657	1.0302	0.9849	0.9825	0.9449	0.8492	0.8088	0.7658	0.66	0.6011	0.5331	0.5634	0.5797	0.5888	0.7221	0.7376	0.8323	1.0238	0.9256	0.8336	0.8718	0.7915	0.6442	0.6167	0.5217	0.4482	0.4001
310	HtMa / HtMa	young	r	C3A2	101	96.7683	122.551	35.6228	10.9153	6.2862	4.9395	4.3429	5	5.8124	4.9152	4.2355	3.5019	3.4008	2.7685	2.3578	2.0064	1.8591	1.6988	1.4674	1.3986	1.2864	1.2588	1.2021	1.1277	1.0266	1.0545	1.0201	0.8688	0.9316	1.0475	1.0017	0.9414	0.8337	0.7685	0.6871	0.6564	0.6795	0.6605	0.6119	0.5911	0.5378	0.4495	0.4322	0.3866
310	HtMa / HtMa	young	b	C3A2	107.333	29.109	43.0316	15.9517	7.7468	6.0666	5.0499	4.4626	4.4085	4.7218	4.8564	4.2257	3.552	2.847	2.3835	2.0852	2.0088	1.8338	1.6313	1.5405	1.5087	1.4281	1.4601	1.4656	1.375	1.2864	1.2741	1.2592	1.3157	1.3341	1.3093	1.1276	0.9799	0.9556	0.9118	0.975	0.9885	1.1383	1.1268	1.0819	1.0194	0.8208	0.659	0.6116	0.5222
320	HtMa / HtMa	young	r	C3A2	94.3333	20.5212	28.1302	12.1396	7.551	6.6246	6.7807	6.0421	5.7335	5.332	4.9253	4.3605	3.7097	3.3257	3.1319	2.7302	2.4834	2.3122	2.0903	2.0834	2.109	2.0203	1.8466	1.7121	1.4954	1.3246	1.1985	1.0759	1.0045	0.8844	0.7865	0.7693	0.7206	0.6202	0.6136	0.5562	0.5019	0.4571	0.4172	0.3743	0.3338	0.318	0.2953	0.2832	0.254
320	HtMa / HtMa	young	b	C3A2	106.333	14.7193	23.3531	12.4844	8.2874	7.3985	6.5616	5.6362	5.1954	4.9235	4.4273	3.9786	3.4468	3.2104	2.8776	2.6309	2.4149	2.3472	2.2349	2.1152	2.021	2.0402	1.9078	1.7803	1.7009	1.5767	1.3817	1.2073	1.0561	0.9553	0.9066	0.8619	0.7671	0.7453	0.735	0.6524	0.5963	0.5337	0.4834	0.3977	0.3784	0.3507	0.3179	0.3033	0.2709
326	HtMa / HtMa	young	r	C3A2	129.333	19.9308	31.4676	13.4602	6.9948	6.2581	5.1338	3.4611	3.0976	3.1513	3.2388	3.2007	3.0517	2.9212	2.6461	2.3288	2.1552	2.0415	1.9105	1.7213	1.5928	1.4642	1.3218	1.238	1.141	1.0822	1.0126	0.9413	0.8227	0.7564	0.7096	0.6658	0.6552	0.6156	0.6203	0.5891	0.5855	0.6052	0.5719	0.5444	0.5587	0.5677	0.5424	0.5079	0.4774
326	HtMa / HtMa	young	b	C3A2	123.667	28.375	42.9494	14.3553	6.2575	4.5193	3.5647	2.9653	2.8202	2.8438	2.7792	2.9029	3.0365	2.9048	2.6313	2.3021	2.1835	2.0924	1.8293	1.748	1.6682	1.5486	1.3484	1.2824	1.2516	1.136	1.0351	1.0206	0.9512	0.8389	0.781	0.7702	0.6964	0.6247	0.5736	0.576	0.5933	0.5576	0.5304	0.5359	0.5305	0.5038	0.5054	0.4767	0.4199
343	HtMa /HtMi	young	r	C3A2	77.6667	16.4794	21.3153	7.522	4.6833	3.4636	2.6465	2.2947	1.9204	1.6926	1.6394	1.6126	1.4707	1.3922	1.1809	0.9332	0.8007	0.7924	0.7816	0.6653	0.6448	0.6464	0.6176	0.5588	0.5596	0.5429	0.5227	0.5496	0.6986	0.8607	0.8603	0.6525	0.5197	0.4089	0.3217	0.271	0.2417	0.239	0.2439	0.2176	0.2068	0.2034	0.2137	0.2021	0.1818
343	HtMa /HtMi	young	b	C3A2	80.6667	11.8866	16.6988	6.7746	4.1636	2.9974	2.0942	1.706	1.5008	1.3634	1.172	1.1713	1.0667	0.8996	0.7917	0.6848	0.6128	0.5607	0.5466	0.5613	0.5353	0.4939	0.4609	0.4488	0.4577	0.4325	0.4324	0.4562	0.49	0.5653	0.6589	0.5817	0.4552	0.4073	0.3442	0.2989	0.2659	0.2333	0.2118	0.2049	0.2049	0.1894	0.1831	0.1619	0.1553
348	HtMa /HtMi	young	r	C3A2	88.3333	11.6683	19.9907	11.7521	8.0462	6.9328	4.9903	4.265	3.9383	3.6315	3.0288	2.7498	2.4018	2.0831	2.0105	1.9412	1.9474	1.8912	1.9137	1.9795	2.1782	2.4109	2.2885	1.9611	1.6875	1.522	1.4158	1.3717	1.3329	1.4503	1.5492	1.413	1.3558	1.3422	1.2086	1.1021	1.025	0.918	0.8526	0.7997	0.7193	0.6005	0.5092	0.4417	0.4085
348	HtMa /HtMi	young	b	C3A2	101.333	15.5532	22.143	10.0974	6.6065	5.0229	3.4642	2.929	3.016	2.803	2.2789	2.2602	2.0763	1.8285	1.5231	1.4743	1.5064	1.5448	1.4403	1.3859	1.5664	1.5953	1.457	1.3085	1.2371	1.225	1.1148	1.0892	1.0208	1.0383	1.0753	1.1155	1.2266	1.2144	1.1302	1.1908	1.1814	1.2462	1.2559	1.0401	0.9426	0.7921	0.6227	0.5477	0.4862
373	HtMa / HtMa	young	r	C3A2	90.6667	22.5738	27.9964	9.3376	4.9792	4.5346	4.3986	3.5067	3.332	3.4193	3.2071	2.6416	2.2314	1.9215	1.7573	1.5118	1.4026	1.38	1.2334	1.2119	1.3531	1.3491	1.2924	1.1673	1.0492	0.962	0.8201	0.7465	0.6369	0.5376	0.5233	0.5069	0.4887	0.5146	0.5047	0.4991	0.4913	0.4093	0.3656	0.3402	0.3175	0.2953	0.2891	0.288	0.2425
373	HtMa / HtMa	young	b	C3A2	104	23.2039	27.3969	9.3791	5.7015	4.5689	4.0219	3.5449	3.3041	3.0292	2.6445	2.3186	1.9975	1.8087	1.6335	1.4104	1.281	1.2784	1.2482	1.2433	1.3076	1.4084	1.4587	1.3006	1.2457	1.1681	1.0372	0.9279	0.804	0.7249	0.6886	0.6195	0.593	0.5985	0.6198	0.6147	0.5834	0.5545	0.5206	0.4796	0.4323	0.4001	0.3802	0.3272	0.3113
397	HtMa / HtMa	young	r	C3A2	91	16.6579	22.1851	7.665	4.774	4.5385	3.8984	3.2265	3.2367	3.4334	3.5128	3.3655	3.2621	2.9802	2.4653	2.3551	2.0609	1.5819	1.4775	1.3975	1.3928	1.2357	1.167	1.0659	1.0808	1.0089	0.8912	0.8087	0.7677	0.7273	0.7171	0.679	0.6298	0.6071	0.552	0.5321	0.4668	0.4191	0.392	0.3836	0.3829	0.3438	0.3305	0.3161	0.2807
397	HtMa / HtMa	young	b	C3A2	107.333	10.2915	16.2621	8.832	6.3461	5.246	4.3037	3.9384	3.9476	3.7087	3.6019	3.9147	3.906	3.4779	2.8241	2.7471	2.4959	2.1176	1.6952	1.6258	1.5193	1.433	1.3522	1.239	1.2373	1.1839	1.0433	0.9403	0.9247	0.9489	1.0173	1.0152	0.8952	0.8465	0.8702	0.8129	0.7116	0.645	0.5897	0.6174	0.5628	0.5551	0.5534	0.5006	0.4597
412	HtMa / HtMa	young	r	C3A2	82.3333	25.7787	35.4274	13.2845	7.0114	5.1226	4.0066	3.8214	3.7337	3.8136	3.8584	3.5397	3.5267	3.4157	3.0863	2.9108	2.7264	2.6056	2.331	2.3777	2.3632	2.2069	2.1408	2.0273	1.9604	1.8179	1.6311	1.3044	1.0588	0.9709	0.839	0.7234	0.6842	0.6211	0.5975	0.5724	0.5296	0.5662	0.5452	0.488	0.4457	0.391	0.3665	0.3536	0.3384
412	HtMa / HtMa	young	b	C3A2	116.333	24.249	33.432	14.8233	8.3697	6.0503	4.8755	4.4562	4.4808	4.1341	4.0547	4.0369	3.9652	3.7298	3.3399	2.9546	2.7311	2.4394	2.3102	2.2287	2.2691	2.2651	2.3951	2.2944	2.132	1.8284	1.6357	1.4066	1.1636	1.0622	0.9453	0.8381	0.8157	0.7704	0.7491	0.7521	0.715	0.7355	0.734	0.6187	0.5708	0.5197	0.4851	0.4296	0.3879
426	HtMa /HtMi	young	r	C3A2	94.3333	16.5791	22.7942	11.3646	7.7239	6.4669	6.5374	5.2753	4.8098	5.1789	5.379	4.9463	4.5215	4.7646	4.6024	4.377	3.7968	3.4486	3.2328	2.9764	2.8102	2.4339	2.2075	2.0434	1.78	1.6938	1.714	1.6384	1.5722	1.4436	1.2755	1.222	1.2617	1.3001	1.1332	1.0006	0.8739	0.7312	0.597	0.4793	0.4015	0.3907	0.3719	0.3163	0.2699
426	HtMa /HtMi	young	b	C3A2	94.3333	19.7272	29.6228	13.0159	7.9251	6.4285	5.2165	3.847	4.0776	4.5318	4.5215	4.2267	4.3021	4.3361	4.125	3.7679	3.6651	3.2549	3.0854	3.4172	3.1251	2.781	2.9122	2.4618	2.1138	2.0419	1.8944	1.7477	1.5226	1.329	1.262	1.2581	1.121	1.2561	1.211	1.0924	0.9446	0.8384	0.697	0.584	0.5154	0.4343	0.359	0.3378	0.3133
435	HtMa / HtMa	young	r	C3A2	94	12.5145	19.4684	9.9629	7.2906	6.6764	4.909	3.8142	3.4483	3.3728	3.2196	2.8376	2.3729	2.1956	2.116	1.9329	1.687	1.5913	1.5619	1.4527	1.3687	1.3529	1.3326	1.2768	1.1825	0.9824	0.9575	1.0356	1.0005	1.0103	1.008	0.9747	1.0916	1.1101	1.073	1.0696	1.1388	1.1087	1.0389	1.0134	1.0031	0.9219	0.8322	0.7716	0.7483
435	HtMa / HtMa	young	b	C3A2	112	9.6682	15.1301	8.3917	5.9682	4.7155	3.942	3.6591	3.1482	2.8671	2.5532	2.1374	2.0377	1.9291	1.8549	1.644	1.5114	1.4995	1.4005	1.2676	1.2365	1.1914	1.087	1.0703	1.0401	1.001	0.9628	0.9518	1.0017	1.0102	1.0184	1.1673	1.3117	1.4174	1.3569	1.4785	1.524	1.5098	1.6593	1.6799	1.427	1.2497	1.2514	1.0739	0.8854
455	HtMa / HtMa	young	r	C3A2	96	33.5197	45.1286	16.2897	9.2433	7.4296	6.0239	4.8856	4.4836	4.4603	4.4336	4.2209	3.9649	3.8223	3.4441	2.9866	2.612	2.4635	2.3663	2.1073	2.0378	1.8802	1.6533	1.5087	1.3802	1.2488	1.1874	1.1344	1.074	0.9705	0.8561	0.7866	0.7614	0.7941	0.7724	0.7122	0.6942	0.6331	0.599	0.5961	0.5222	0.473	0.3895	0.357	0.2963
455	HtMa / HtMa	young	b	C3A2	97	26.4984	31.5216	11.4617	7.6076	5.5477	4.2413	3.3934	3.0636	3.1184	3.1383	2.9195	2.7351	2.5243	2.3541	2.0394	1.6404	1.5335	1.3576	1.336	1.3328	1.2304	1.3204	1.24	1.165	1.1059	1.0708	1.0797	0.9976	0.9018	0.792	0.7085	0.6985	0.6886	0.7368	0.7217	0.7118	0.6696	0.6171	0.5344	0.4564	0.4059	0.3843	0.3327	0.2936
462	HtMa / HtMa	young	r	C3A2	81.3333	25.722	32.1893	11.3023	7.2325	5.0652	4.3078	4.0165	3.4087	2.9944	3.0462	2.9129	2.3303	1.8044	1.6119	1.3362	1.3104	1.2401	1.3327	1.398	1.2928	1.2434	1.2548	1.0569	1.0291	1.0617	0.9325	0.8545	0.8377	0.7861	0.665	0.6206	0.5934	0.585	0.5232	0.5909	0.5121	0.4143	0.3834	0.3087	0.2467	0.2271	0.2161	0.1993	0.199
462	HtMa / HtMa	young	b	C3A2	88.3333	25.212	32.8681	10.8671	5.543	4.1938	3.4084	2.7999	2.5449	2.7499	2.918	2.569	1.9912	1.595	1.4353	1.342	1.1686	1.1468	1.2035	1.1234	1.0007	0.983	0.9828	0.88	0.7682	0.6883	0.635	0.5944	0.5578	0.558	0.5594	0.4886	0.4216	0.4492	0.474	0.5177	0.4641	0.4028	0.3848	0.3824	0.3129	0.2857	0.2688	0.2502	0.22
464	HtMa / HtMa	young	r	C3A2	93.6667	29.8467	42.0162	16.0765	8.4723	6.2998	5.6709	4.5358	4.1725	4.1157	4.1793	3.9941	4.1906	4.3726	4.1358	3.606	3.4283	2.9158	2.817	2.5803	2.3034	1.9021	1.6523	1.5599	1.4797	1.3904	1.2054	1.0268	0.9235	0.8306	0.7855	0.733	0.7024	0.6471	0.5713	0.513	0.4508	0.4217	0.3717	0.3591	0.3318	0.2756	0.2516	0.236	0.2043
464	HtMa / HtMa	young	b	C3A2	77.6667	33.769	38.8722	13.9961	8.0344	5.2503	4.4768	4.109	3.515	2.9581	2.7997	2.9601	2.7629	2.5089	2.5579	2.3649	2.1081	1.8987	1.7783	1.6978	1.6713	1.5978	1.5384	1.318	1.0909	1.029	0.9397	0.8694	0.7453	0.6381	0.6356	0.5708	0.527	0.6114	0.5877	0.5149	0.4432	0.3954	0.355	0.3031	0.2728	0.2611	0.2256	0.1947	0.1933
490	HtMa / HtMa	young	r	C3A2	92.6667	15.2266	24.0708	12.0355	8.6636	6.479	4.4662	4.0155	3.9536	3.9494	3.8215	3.2395	3.1938	2.8668	2.5889	2.4536	2.3825	2.2264	2.0607	1.9647	1.8467	1.5633	1.3627	1.2485	1.1598	1.0478	0.9896	0.9261	0.8808	0.8433	0.7798	0.7397	0.6581	0.5662	0.4741	0.4133	0.3613	0.3252	0.2899	0.2655	0.2301	0.2251	0.22	0.1985	0.1864
490	HtMa / HtMa	young	b	C3A2	105	28.0068	38.9217	14.8378	7.8268	5.4517	3.8941	3.2854	2.7215	2.6643	2.6907	2.2779	1.8542	1.7788	1.6197	1.4671	1.3652	1.3636	1.3879	1.4048	1.33	1.22	1.205	1.1049	0.9875	0.9382	0.8534	0.8269	0.812	0.7776	0.7585	0.678	0.6347	0.6247	0.5683	0.5242	0.4598	0.3996	0.3709	0.3269	0.2822	0.2495	0.239	0.226	0.2237
495	HtMa / HtMa	young	r	C3A2	119.333	19.2319	23.6758	8.3774	5.2784	3.9934	2.832	2.3583	2.3967	2.4274	2.5772	2.2409	1.9848	1.8692	1.8085	1.6349	1.5359	1.445	1.2965	1.1858	1.1234	1.022	0.9396	0.8555	0.7577	0.7177	0.667	0.6559	0.6225	0.6086	0.5924	0.5336	0.4884	0.4619	0.409	0.3376	0.2889	0.2472	0.2116	0.1797	0.1667	0.1665	0.1565	0.1412	0.133
495	HtMa / HtMa	young	b	C3A2	131.667	20.0945	25.8672	10.2268	6.0249	4.3595	2.9115	2.5412	2.4388	2.6011	2.5185	2.4572	2.4173	2.0923	1.8855	1.8343	1.5914	1.3608	1.2737	1.2166	1.1226	1.0388	0.9852	0.951	0.8416	0.7812	0.7298	0.7004	0.6693	0.6608	0.6633	0.6378	0.5381	0.5046	0.4859	0.4547	0.3703	0.2937	0.2527	0.2179	0.1954	0.1803	0.1562	0.1324	0.1293
507	HtMa / HtMa	young	r	C3A2	82.3333	29.7215	46.8281	24.3851	13.826	9.445	6.8855	5.6275	4.6773	4.1007	3.7756	3.3794	3.1668	2.9186	2.6842	2.4959	2.4573	2.1767	1.8606	1.6484	1.5072	1.4651	1.3136	1.2175	1.1413	1.1335	1.1005	1.1047	1.3654	1.6819	1.5884	1.5697	1.6376	1.3694	0.8647	0.7428	0.6628	0.6028	0.5344	0.4739	0.4359	0.3674	0.2988	0.2736	0.2593
507	HtMa / HtMa	young	b	C3A2	109.333	18.0679	23.9702	9.5541	5.8467	4.5381	3.517	2.7078	2.4148	2.594	2.3295	1.9823	1.813	1.7786	1.5613	1.4085	1.2659	1.1458	1.0063	0.9317	0.8999	0.8036	0.7674	0.7881	0.7226	0.6765	0.6773	0.649	0.6171	0.5614	0.544	0.5357	0.5068	0.4906	0.5498	0.5256	0.5607	0.576	0.4917	0.4385	0.3838	0.3442	0.3073	0.2516	0.2088
604	HtMa / HtMa	young	r	C3A2	34	55.8376	99.0927	89.7868	72.8023	50.4669	37.5254	27.3434	18.8761	13.6098	10.8485	8.4735	6.6378	6.25	5.7762	4.8186	4.4796	4.321	4.3361	4.0441	3.8534	3.4983	3.604	3.4061	3.2576	3.1818	3.0173	2.8593	2.7216	2.4948	2.3986	2.2221	1.9509	1.8178	1.6224	1.4777	1.2883	1.152	1.041	0.8487	0.6951	0.5709	0.5122	0.4729	0.4185
604	HtMa / HtMa	young	b	C3A2	65.6667	37.4389	60.3583	36.6082	23.8107	16.2276	11.4037	8.8962	6.9199	5.9678	5.0688	4.188	3.4013	3.0236	2.6969	2.4044	2.233	2.1662	2.181	2.1195	1.9389	1.8546	1.8252	1.7216	1.7803	1.7967	1.6634	1.7396	1.7282	1.7242	1.7517	1.9496	1.9581	1.829	1.6375	1.3296	1.0526	0.8679	0.7411	0.6301	0.5069	0.4258	0.3847	0.335	0.3179
605	HtMa / HtMa	young	r	C3A2	88.3333	27.5535	51.7596	21.0728	10.2653	7.0487	5.2894	4.3095	3.9971	3.3819	3.3927	2.8668	2.5815	2.3377	2.0691	1.9442	2.0172	1.842	1.6801	1.5649	1.4662	1.3929	1.2688	1.1121	1.0053	0.9104	0.8533	0.8142	0.7543	0.7492	0.7639	0.8224	0.8316	0.8147	0.7848	0.79	0.7941	0.703	0.6499	0.6103	0.5385	0.4682	0.4379	0.3971	0.3616
605	HtMa / HtMa	young	b	C3A2	139	19.1525	30.0686	13.6461	7.2053	4.7969	3.9039	3.5359	3.1879	2.8225	2.7581	2.4855	2.1322	1.9391	1.6923	1.5283	1.4625	1.3552	1.2418	1.1612	1.0845	0.9903	0.9298	0.8633	0.7936	0.7154	0.6679	0.6253	0.5887	0.5965	0.572	0.5697	0.582	0.599	0.6416	0.6713	0.7187	0.6895	0.6639	0.6233	0.5897	0.5443	0.506	0.449	0.3997
607	HtMa / HtMa	young	r	C3A2	102.667	29.6572	37.2217	12.6671	7.8577	6.1313	4.5794	3.4671	2.9567	2.7481	2.6108	2.3873	2.1571	1.9997	1.8087	2.0248	2.7752	2.7601	1.9478	1.6795	1.3709	1.2523	1.1968	1.0598	0.9528	0.8715	0.8345	0.8029	0.7658	0.8513	1.234	2.8962	4.274	2.3801	0.8327	0.4308	0.3511	0.3126	0.2784	0.2592	0.2526	0.2296	0.2096	0.1996	0.1881
607	HtMa / HtMa	young	b	C3A2	123.667	25.0119	32.3588	11.5288	5.6314	4.2238	3.308	2.7027	2.2992	2.083	1.9195	1.7445	1.5861	1.4949	1.3335	1.2451	1.3604	1.3235	1.2026	1.1603	1.064	1.0256	0.9967	0.9666	0.8708	0.7836	0.7489	0.673	0.6142	0.6064	0.6609	0.8107	0.8631	0.564	0.3894	0.3558	0.326	0.2967	0.2798	0.2656	0.2358	0.223	0.2091	0.1888	0.1815
608	HtMa /HtMi	young	r	C3A2	94.6667	46.823	59.722	25.2282	18.0069	14.3989	11.4517	9.1281	7.7677	7.2367	6.6046	5.3248	4.2378	3.5092	2.9751	2.6461	2.7354	2.7401	2.2811	1.8461	1.7702	1.6905	1.5271	1.4388	1.3693	1.1986	1.0348	0.9771	0.9476	0.8901	0.8711	0.9458	0.9736	0.9579	0.8442	0.751	0.6993	0.6597	0.6254	0.5635	0.5819	0.5463	0.5087	0.4894	0.4908
608	HtMa /HtMi	young	b	C3A2	92	83.1035	109.913	32.6656	14.6509	10.3001	7.63	6.1543	5.5272	5.107	4.9686	4.3751	3.4577	2.9743	2.5338	2.1178	2.0155	1.8647	1.6562	1.6696	1.5779	1.5752	1.4818	1.3617	1.3826	1.3082	1.269	1.2535	1.2327	1.3364	1.2746	1.1503	0.9979	0.9608	0.8856	0.842	0.7774	0.7128	0.6607	0.608	0.6179	0.5867	0.5437	0.5332	0.5282
609	HtMa / HtMa	young	r	C3A2	96.6667	41.0692	51.0112	15.8432	7.8624	4.4045	3.6735	3.2418	3.2582	3.2823	2.9869	2.7292	2.3556	2.1467	1.8971	1.6833	1.5501	1.4634	1.3322	1.2291	1.2282	1.1032	1.005	0.8633	0.8042	0.7192	0.6363	0.6332	0.6586	0.7286	0.7656	0.6596	0.5023	0.4172	0.3533	0.303	0.2705	0.2414	0.2252	0.2074	0.1992	0.1803	0.1598	0.1409	0.1401
609	HtMa / HtMa	young	b	C3A2	92.6667	31.9182	46.0073	16.2921	7.4675	4.4	3.5306	2.9574	2.9195	2.7871	2.4315	2.2888	2.1106	1.7458	1.4762	1.3498	1.2837	1.2875	1.257	1.1426	1.0683	0.9902	0.9252	0.8644	0.7546	0.6803	0.5901	0.5397	0.5547	0.5898	0.596	0.5463	0.4763	0.4	0.3511	0.2989	0.2741	0.2616	0.2362	0.22	0.2074	0.1979	0.1786	0.1712	0.1483
610	HtMa / HtMa	young	r	C3A2	105	50.6904	61.1415	20.5494	12.1262	8.8172	7.2704	6.7213	6.8616	6.9553	6.6221	5.6926	4.7187	4.1152	3.4937	3.0732	2.8643	2.605	2.4843	2.3632	2.2039	2.0369	1.9047	1.7099	1.5519	1.4349	1.3404	1.1849	1.0607	0.9583	0.8336	0.7257	0.6607	0.5904	0.5247	0.4596	0.4139	0.3616	0.3063	0.2929	0.2533	0.226	0.2108	0.1977	0.1767
610	HtMa / HtMa	young	b	C3A2	110.333	53.8949	70.9879	22.639	11.195	8.0893	6.3236	5.3185	5.1929	4.9688	5.0288	4.6921	4.0521	3.8383	3.3775	3.1036	2.6288	2.4215	2.2527	2.1358	2.0488	1.8231	1.6744	1.5893	1.4519	1.3778	1.3062	1.201	1.0982	0.9782	0.8946	0.7835	0.72	0.6831	0.6266	0.5526	0.4805	0.4498	0.4173	0.3669	0.3264	0.3086	0.2782	0.2606	0.2397
611	HtMa / HtMa	young	r	C3A2	134	34.0063	45.1319	16.7743	10.4091	8.2085	6.5314	6.0225	5.7432	5.5792	5.0031	4.1419	3.9916	4.119	4.2631	5.0113	4.5748	3.3114	2.7328	2.4316	2.1353	1.9671	1.6954	1.4531	1.3379	1.2948	1.1875	1.1782	1.3185	1.6823	1.5716	1.0612	0.796	0.7521	0.7466	0.6777	0.6053	0.4894	0.4117	0.3515	0.3179	0.3017	0.2817	0.2633	0.2614
611	HtMa / HtMa	young	b	C3A2	157.333	33.095	50.8883	17.6902	7.7549	5.52	4.3901	4.1278	4.0766	3.752	3.3833	3.092	2.8728	2.6167	2.4238	2.3818	2.3458	2.1874	2.0921	1.9953	1.9608	1.863	1.6935	1.4836	1.3075	1.1529	0.987	0.9828	1.0023	1.0014	0.8854	0.9555	0.9555	0.9995	1.0015	0.9376	0.8492	0.6762	0.5557	0.4854	0.4078	0.3205	0.2807	0.2609	0.2366
612	HtMa / HtMa	young	r	C3A2	107.667	36.8696	47.6495	17.7974	10.6477	7.644	5.4977	4.9567	4.6955	4.3266	3.6739	3.3292	2.8958	2.5391	2.2255	1.9306	1.7091	1.5829	1.3479	1.2506	1.1967	1.1654	1.0774	1.0026	0.9395	0.8887	0.8616	0.828	0.7977	0.8225	0.9001	0.9448	0.8402	0.7583	0.7366	0.7817	0.7938	0.8017	0.8149	0.8035	0.7498	0.7136	0.6635	0.6355	0.5757
612	HtMa / HtMa	young	b	C3A2	89.3333	24.9384	38.7817	19.0626	10.3203	7.6065	5.6803	4.8041	4.1847	3.5131	3.1456	2.9017	2.4919	2.0606	1.7179	1.5347	1.4144	1.3114	1.1782	1.0914	1.0253	0.9078	0.878	0.8192	0.7486	0.685	0.6602	0.6683	0.673	0.6559	0.6796	0.7106	0.7096	0.6974	0.681	0.7544	0.8133	0.8413	0.872	0.8353	0.8362	0.8418	0.7854	0.6739	0.6096
613	HtMa /HtMi	young	r	C3A2	122.333	87.1389	132.715	47.3135	20.0099	12.53	8.9081	6.6995	5.6583	4.8284	4.6919	4.0488	3.7566	3.6486	3.5921	3.3142	3.0047	2.5808	2.4446	2.4139	2.3164	2.2166	2.2162	1.8919	1.6428	1.5528	1.4597	1.3447	1.2639	1.2156	1.1358	1.0224	0.957	0.9015	0.8409	0.7636	0.7069	0.654	0.5971	0.5608	0.5119	0.4505	0.4068	0.4055	0.3956
613	HtMa /HtMi	young	b	C3A2	104.667	97.2958	146.689	46.7955	18.3659	10.855	7.1258	5.6651	4.6689	3.873	3.6412	3.5739	3.3789	3.4183	3.2489	3.2464	3.1199	2.7268	2.4944	2.297	2.2245	2.3019	2.0698	1.7934	1.6877	1.5098	1.4243	1.3305	1.264	1.1642	1.158	1.0466	0.9928	0.9776	0.9767	0.9642	0.9126	0.8539	0.7586	0.7315	0.689	0.6312	0.558	0.5465	0.5328
614	HtMi / HtMi	young	r	C3A2	107	26.4633	32.0122	9.4504	5.0867	4.2291	3.5698	2.7666	2.6549	2.7815	2.8412	2.8241	2.7368	2.4064	2.0182	1.5864	1.3302	1.1286	1.059	0.9811	0.9104	0.8493	0.7848	0.6711	0.5904	0.5412	0.4969	0.4248	0.3798	0.3356	0.2911	0.2651	0.2326	0.2192	0.213	0.1992	0.1845	0.1705	0.167	0.1654	0.1547	0.1491	0.1382	0.1303	0.1215
614	HtMi / HtMi	young	b	C3A2	63.6667	30.0394	37.4472	10.5687	5.0765	3.4646	2.586	2.2157	2.228	2.0811	1.9243	1.7538	1.5697	1.4723	1.3359	1.1162	0.9783	0.8428	0.7693	0.8281	0.7656	0.7081	0.6776	0.5918	0.5216	0.5001	0.4531	0.3894	0.349	0.3368	0.3148	0.2883	0.2785	0.2597	0.2494	0.2448	0.2366	0.2421	0.2327	0.2185	0.2012	0.1926	0.1808	0.1711	0.1528
615	HtMa /HtMi	young	r	C3A2	130.333	29.4686	39.2719	17.0223	10.6254	7.9377	6.4019	5.4092	4.7495	4.2824	3.8396	3.6012	3.4531	3.1759	2.88	2.6186	2.4478	2.1325	1.8688	1.7767	1.6716	1.5199	1.3843	1.2622	1.2153	1.1631	1.1407	1.0356	0.92	0.8618	0.8337	0.8067	0.748	0.744	0.7094	0.6485	0.6047	0.5178	0.4549	0.4008	0.3484	0.3063	0.2773	0.2449	0.2343
615	HtMa /HtMi	young	b	C3A2	111.333	35.9408	48.7602	21.1804	12.3588	8.861	6.2336	4.7047	4.0667	3.7325	3.3601	2.9306	2.8252	2.5376	2.2687	2.1785	1.9606	1.7997	1.7418	1.7125	1.539	1.3556	1.2409	1.1317	1.0664	0.9607	0.8933	0.7879	0.7374	0.7357	0.7257	0.6693	0.6566	0.6717	0.7	0.7094	0.6399	0.5671	0.5012	0.4705	0.4102	0.3734	0.3168	0.2616	0.2276
616	HtMa /HtMi	young	r	C3A2	91	25.0341	38.4556	17.1063	10.0135	7.5543	5.7803	4.9383	4.7891	4.7272	4.2394	3.616	2.9105	2.3907	2.0974	1.7867	1.6299	1.4854	1.4507	1.443	1.4517	1.3971	1.3389	1.3365	1.3393	1.3359	1.2311	1.1546	1.048	0.8836	0.7555	0.6967	0.6418	0.6275	0.5616	0.5462	0.5442	0.4871	0.4746	0.484	0.4253	0.3633	0.3224	0.2904	0.2748
616	HtMa /HtMi	young	b	C3A2	111.333	26.8954	43.647	20.7864	10.7558	7.6208	5.4562	4.5298	4.3445	3.9607	3.4818	3.0256	2.571	2.2066	1.9181	1.73	1.6136	1.5061	1.4582	1.4003	1.3766	1.3612	1.41	1.4671	1.3389	1.3111	1.3192	1.2993	1.1324	0.9848	0.936	0.8486	0.7975	0.7834	0.753	0.7138	0.684	0.6577	0.6234	0.5521	0.4706	0.4271	0.3952	0.3607	0.3285
619	HtMa /HtMi	young	r	C3A2	108	26.0335	37.0841	14.0482	8.0462	5.531	4.1139	3.4361	3.0834	2.8847	2.7814	2.7476	2.6573	2.3587	2.3362	2.322	2.082	1.9468	1.8469	1.7464	1.6554	1.5456	1.4239	1.2865	1.1128	1.0355	0.9816	0.8546	0.7126	0.6298	0.604	0.5202	0.4671	0.4037	0.3434	0.3038	0.2631	0.2408	0.2168	0.1933	0.1873	0.184	0.1679	0.1621	0.1525
619	HtMa /HtMi	young	b	C3A2	78.3333	27.8507	43.5109	17.1753	8.3645	5.3933	3.5379	2.7325	2.3666	2.1487	2.0599	1.9147	1.7486	1.6385	1.5806	1.5168	1.4985	1.4735	1.4128	1.3439	1.3455	1.2413	1.1476	1.037	1.008	0.9305	0.8371	0.7495	0.6703	0.6125	0.5514	0.4918	0.4245	0.4012	0.3765	0.3123	0.2692	0.2315	0.197	0.1881	0.1779	0.164	0.161	0.1529	0.1499
621	HtMa /HtMi	young	r	C3A2	82.6667	35.2319	44.406	17.451	12.1728	8.8852	6.6495	5.0625	4.2136	3.7368	3.6843	3.5731	3.2624	2.6687	2.2827	1.9826	1.7359	1.5756	1.4703	1.3318	1.1541	1.0556	1.0487	0.9762	0.9405	0.8706	0.8051	0.7438	0.7313	0.7195	0.6986	0.6747	0.6844	0.6979	0.6386	0.5974	0.5332	0.477	0.4614	0.4606	0.4116	0.3506	0.3276	0.3197	0.308
621	HtMa /HtMi	young	b	C3A2	109	71.8402	85.2154	26.7175	14.4182	10.3449	7.1575	5.1889	3.9231	3.225	3.1085	2.9791	2.6976	2.2967	2.0802	1.9237	1.6147	1.4863	1.3926	1.2559	1.1812	1.0902	0.9886	0.9454	0.9331	0.9571	0.993	0.9367	0.931	0.8607	0.9039	0.9634	0.9718	0.9976	1.0206	0.9153	0.8991	0.8848	0.81	0.7165	0.5979	0.5094	0.4518	0.4217	0.394
622	HtMa /HtMi	young	r	C3A2	140	18.481	24.8125	9.7144	6.3928	4.4047	3.7171	3.7259	3.2128	3.2684	3.2258	3.0055	2.9687	2.7559	2.4223	2.0676	1.7981	1.5305	1.4533	1.3553	1.2389	1.1186	1.0298	0.9257	0.8527	0.7697	0.7141	0.6741	0.6314	0.5904	0.5393	0.4789	0.4427	0.4119	0.3936	0.3767	0.3495	0.3262	0.3019	0.2732	0.2402	0.2196	0.2018	0.1836	0.1667
622	HtMa /HtMi	young	b	C3A2	139.667	23.55	36.0506	13.1065	6.7881	4.5639	3.4945	2.8679	2.7322	2.547	2.4138	2.3141	2.1943	2.0882	1.9316	1.7138	1.4468	1.3969	1.3281	1.2267	1.1244	1.0629	0.9578	0.8559	0.7772	0.6821	0.6308	0.6039	0.5465	0.494	0.4758	0.4086	0.3778	0.356	0.3316	0.3094	0.3093	0.2987	0.2814	0.246	0.2277	0.2149	0.1964	0.1811	0.1665
623	HtMi / HtMi	young	r	C3A2	84.3333	81.3286	101.613	25.9241	10.4077	7.2612	5.4198	4.0362	3.5124	3.57	3.2229	2.8903	2.7922	2.5918	2.07	1.7353	1.457	1.2629	1.1527	1.0114	1.045	0.9433	0.7889	0.7596	0.7736	0.7197	0.6748	0.6362	0.5734	0.535	0.4986	0.4764	0.4048	0.3567	0.3305	0.3187	0.2927	0.2567	0.2467	0.2304	0.209	0.1836	0.171	0.1611	0.1487
623	HtMi / HtMi	young	b	C3A2	119	50.9497	64.5679	19.9358	9.5565	6.6635	4.8166	3.5766	2.8786	2.8127	2.758	2.3745	2.0576	1.9156	1.6967	1.4739	1.2162	1.1479	1.1673	1.1105	0.994	0.9158	0.8753	0.8407	0.7412	0.6786	0.6304	0.6126	0.5969	0.5276	0.4647	0.4071	0.3809	0.3658	0.3331	0.3189	0.2944	0.2864	0.2572	0.2295	0.2197	0.2033	0.1814	0.1694	0.1584
624	HtMa /HtMi	young	r	C3A2	109	26.5232	37.6836	14.7929	8.6017	5.9476	4.4211	3.901	3.4867	2.9089	2.7522	2.5319	2.2176	2.0114	1.8902	1.7002	1.6605	1.5545	1.4489	1.3745	1.3318	1.2891	1.2215	1.1211	1.0274	1.0067	0.9622	0.985	1.0971	1.2556	1.2553	1.0821	0.8981	0.7266	0.5747	0.4767	0.4159	0.3584	0.2939	0.2634	0.236	0.2056	0.1811	0.1654	0.1544
624	HtMa /HtMi	young	b	C3A2	93.3333	43.0328	55.9343	19.9538	10.9217	6.8619	4.8973	4.2897	3.3917	2.8235	2.4671	2.2384	1.9833	1.8694	1.7001	1.4935	1.4421	1.3739	1.2758	1.3184	1.1996	1.1472	1.0377	0.9458	0.8997	0.9514	0.9342	0.8919	0.8731	0.8623	0.8689	0.9094	0.8592	0.7798	0.713	0.6243	0.5588	0.4644	0.3791	0.3355	0.3028	0.2733	0.2324	0.2033	0.1763
625	HtMa /HtMi	young	r	C3A2	94.6667	30.6474	40.2176	12.5216	7.7983	6.2362	4.8419	4.2308	4.3203	4.0118	3.1293	2.7513	2.3998	2.1542	1.891	1.6711	1.4667	1.2167	1.1387	1.1214	1.0588	0.9605	0.9046	0.8744	0.8532	0.7943	0.7537	0.766	0.7381	0.6626	0.6423	0.6175	0.5901	0.5698	0.5334	0.4694	0.4133	0.3431	0.296	0.2559	0.224	0.2183	0.2033	0.1902	0.1761
625	HtMa /HtMi	young	b	C3A2	122	29.549	41.6643	14.8586	7.6316	5.83	4.639	3.9398	3.5643	3.2455	2.6393	2.3229	2.0822	1.8703	1.5803	1.4245	1.2676	1.1472	1.1093	1.1175	0.9991	0.9127	0.8265	0.7702	0.7638	0.7187	0.6972	0.7233	0.7345	0.7319	0.7204	0.7275	0.7729	0.7657	0.6976	0.5886	0.4886	0.4038	0.3476	0.3041	0.272	0.2393	0.2071	0.2007	0.1878
626	HtMa / HtMa	young	r	C3A2	138.333	38.2063	54.4577	24.439	14.8245	10.8877	8.4878	6.7856	6.4898	7.1111	7.3603	7.5331	7.202	6.4171	5.3663	4.6834	3.7863	3.2353	2.7805	2.3576	2.1085	1.8246	1.5509	1.3883	1.2114	1.1563	1.0358	0.8928	0.7966	0.7245	0.6397	0.5893	0.5531	0.5301	0.5095	0.4738	0.4747	0.4451	0.4028	0.3519	0.3132	0.2872	0.2579	0.2484	0.231
626	HtMa / HtMa	young	b	C3A2	133	57.6942	82.4348	30.0583	14.5552	9.6696	6.9428	5.2548	5.0866	5.0303	4.9098	4.5554	4.2534	3.9041	3.3604	2.9443	2.692	2.3741	2.0291	1.8434	1.6192	1.5231	1.3387	1.1799	1.0496	0.9641	0.8291	0.7026	0.6186	0.5515	0.5052	0.5236	0.5209	0.5635	0.5874	0.5685	0.5676	0.5227	0.5074	0.391	0.3317	0.2821	0.2513	0.2418	0.2155
627	HtMa / HtMa	young	r	C3A2	86.6667	25.221	36.2806	16.6697	10.553	8.0737	6.4199	5.9397	6.2996	6.5198	6.4397	6.0691	5.2934	4.7093	4.1271	3.7415	3.7027	3.401	3.3824	3.407	2.9481	2.6634	2.6337	2.4868	2.3605	2.326	2.1796	2.0534	2.1578	2.1203	2.1794	2.3392	2.3552	2.4005	1.9256	1.6644	1.3199	1.0099	0.85	0.7186	0.6355	0.5481	0.4929	0.4639	0.4658
627	HtMa / HtMa	young	b	C3A2	118	28.0921	38.8639	15.7882	8.8751	6.837	5.4916	4.9324	4.8435	4.7725	4.6464	4.4174	4.1869	3.6595	2.9629	2.6946	2.6567	2.5914	2.4309	2.3143	2.35	2.3415	2.304	2.1729	1.9893	1.8651	1.7888	1.6538	1.5663	1.4879	1.5185	1.4745	1.5325	1.6904	1.7916	1.6863	1.4471	1.1791	1.0071	0.8703	0.7406	0.6307	0.5832	0.5313	0.4816
628	HtMa /HtMi	young	r	C3A2	155.333	54.1951	70.9414	20.0214	8.27	6.1238	4.4062	3.7561	3.8737	3.8216	3.3445	2.8813	2.5628	2.2885	1.9147	1.5529	1.4754	1.3968	1.2422	1.1247	1.0115	0.9105	0.8872	0.7361	0.683	0.6174	0.5318	0.4794	0.4314	0.3917	0.3536	0.3142	0.2691	0.2443	0.2235	0.2069	0.1924	0.1803	0.1765	0.1651	0.1547	0.1448	0.1451	0.1321	0.119
628	HtMa /HtMi	young	b	C3A2	140	72.1686	105.467	34.9725	12.4539	7.3019	5.2342	4.2151	3.5981	3.0114	2.668	2.3979	2.1512	1.8299	1.5867	1.4121	1.2251	1.1004	1.0015	0.9552	0.8824	0.7992	0.7417	0.6567	0.5973	0.5643	0.5096	0.4665	0.4218	0.3742	0.321	0.2854	0.26	0.226	0.2079	0.1966	0.1966	0.1901	0.1835	0.1735	0.1617	0.1502	0.1499	0.14	0.1304
629	HtMa / HtMa	young	r	C3A2	74.6667	42.7682	63.6783	23.2674	12.1626	9.7259	7.6775	5.6531	5.2263	4.9291	4.5166	3.711	3.3266	2.793	2.3151	2.0425	1.734	1.5876	1.3259	1.1754	1.117	1.0244	0.9054	0.8055	0.7536	0.725	0.6652	0.5963	0.5367	0.4957	0.4579	0.4193	0.4105	0.3748	0.3687	0.3534	0.3308	0.3034	0.2724	0.2492	0.2284	0.2122	0.1931	0.1748	0.167
629	HtMa / HtMa	young	b	C3A2	104.333	37.9181	61.9215	26.8455	12.3424	7.9572	5.7317	4.3264	3.5734	3.3328	3.0641	2.6517	2.3024	1.9813	1.7002	1.5174	1.3104	1.1773	1.1336	0.9833	0.8495	0.7674	0.7242	0.6611	0.5995	0.5529	0.5224	0.4848	0.4694	0.4389	0.4365	0.4163	0.3931	0.3859	0.3965	0.3714	0.3521	0.3363	0.3288	0.2966	0.2599	0.2329	0.2095	0.187	0.1775
630	HtMa /HtMi	young	r	C3A2	112.333	31.7488	48.0937	27.1293	19.3362	13.2616	9.336	7.1668	6.0459	5.8172	5.5533	4.9145	4.6079	4.089	3.4175	2.9614	2.5505	2.0781	1.7939	1.5521	1.4439	1.2804	1.1613	0.9716	0.8534	0.7794	0.7145	0.6409	0.6016	0.5639	0.5343	0.5524	0.5625	0.576	0.5727	0.558	0.5188	0.4652	0.4159	0.3905	0.3735	0.3257	0.2962	0.2844	0.2796
630	HtMa /HtMi	young	b	C3A2	104.333	52.1399	62.023	21.3328	12.4013	8.6693	6.5082	5.3899	4.7327	4.4629	4.0428	3.4461	3.1274	2.7944	2.5734	2.2789	2.0907	1.8729	1.6007	1.4488	1.3159	1.2178	1.085	1.005	0.9593	0.7997	0.7574	0.7257	0.694	0.6775	0.6824	0.7065	0.7441	0.8169	0.8256	0.7311	0.6761	0.6049	0.5545	0.5031	0.4588	0.4055	0.3471	0.3124	0.2914
631	HtMa / HtMa	young	r	C3A2	117.667	21.1094	28.1896	11.7506	8.5068	5.701	3.6016	3.5521	3.2615	2.7524	2.5597	2.2353	1.8256	1.6328	1.5748	1.3929	1.2801	1.1261	1.024	0.9895	0.9259	0.832	0.8137	0.7644	0.6819	0.6428	0.6005	0.5768	0.5343	0.5136	0.4927	0.4652	0.4607	0.4648	0.4984	0.5473	0.5692	0.5533	0.5008	0.4539	0.4237	0.3724	0.3461	0.3087	0.2892
631	HtMa / HtMa	young	b	C3A2	106	46.5646	64.7146	22.1896	10.5431	5.8888	3.6761	3.2532	3.0204	2.5867	2.4004	2.1769	1.8509	1.5675	1.3437	1.1997	1.0963	1.0291	0.9775	0.9201	0.8705	0.8759	0.8333	0.7777	0.7314	0.662	0.6221	0.5732	0.5511	0.529	0.4985	0.5081	0.5062	0.5083	0.5423	0.5598	0.5924	0.592	0.5211	0.4472	0.3963	0.3577	0.3338	0.3055	0.2776
632	HtMa / HtMa	young	r	C3A2	81.3333	16.9069	24.2881	9.9184	6.2846	4.7977	3.179	2.59	2.7015	2.2887	2.0666	1.8324	1.6219	1.4779	1.3469	1.2743	1.065	0.937	0.8898	0.8129	0.7305	0.6873	0.6965	0.6855	0.6454	0.6505	0.6537	0.6608	0.5871	0.5816	0.6109	0.6128	0.6393	0.6009	0.5346	0.526	0.5028	0.4783	0.462	0.4118	0.3676	0.3464	0.3328	0.3026	0.2806
632	HtMa / HtMa	young	b	C3A2	132	23.1961	32.7674	11.4037	5.4846	4.0317	2.7926	2.443	2.4499	2.1955	1.8441	1.6913	1.4576	1.2238	1.0719	0.9299	0.8624	0.8381	0.8102	0.826	0.8184	0.7607	0.7137	0.6869	0.6875	0.6576	0.628	0.5934	0.5583	0.5281	0.5308	0.4952	0.5168	0.5307	0.5209	0.5218	0.5293	0.4895	0.4538	0.4307	0.3946	0.3286	0.292	0.2709	0.2617
633	HtMa / HtMa	young	r	C3A2	80.6667	39.4843	47.5758	15.943	9.4088	8.1564	5.6513	3.9902	3.5591	4.0629	3.8484	3.162	2.8009	2.6585	2.4253	1.9503	1.6241	1.4941	1.3757	1.2598	1.1809	1.1152	1.061	0.9931	0.9336	0.9912	0.9644	0.9748	1.1411	1.2576	1.2191	1.1039	1.0486	0.9487	0.8001	0.7272	0.6785	0.5676	0.4988	0.4246	0.3684	0.3387	0.3107	0.286	0.2747
633	HtMa / HtMa	young	b	C3A2	142	32.262	43.6075	18.0319	10.1011	7.8425	5.4751	3.887	3.5133	3.6147	3.6447	3.1259	2.7036	2.4937	2.154	1.83	1.554	1.3963	1.3542	1.2823	1.1881	1.1124	1.0604	1.0255	1.0434	1.0852	1.1198	1.2681	1.3902	1.3853	1.2102	1.1977	1.174	1.1016	1.0451	0.9824	0.9213	0.8057	0.6389	0.5444	0.4693	0.4053	0.361	0.3312	0.3046
646	HtMa / HtMa	young	r	C3A2	72	30.5649	40.4896	16.4674	9.0744	7.2218	6.2315	5.5567	5.0733	4.7076	4.4387	4.0263	3.5613	3.3455	3.2073	2.9684	2.7501	2.6457	2.474	2.216	2.0193	1.8894	1.6553	1.4555	1.2041	1.0425	0.9453	0.8562	0.7505	0.7186	0.6806	0.6466	0.5728	0.521	0.4867	0.4673	0.4225	0.3768	0.3629	0.3397	0.3306	0.3308	0.3021	0.2681	0.2322
646	HtMa / HtMa	young	b	C3A2	101.667	76.0297	85.3695	23.7805	12.2861	8.5542	6.5958	5.3032	4.8576	4.5397	4.4263	4.3173	3.824	3.5135	3.1651	2.8156	2.7147	2.6072	2.6184	2.4776	2.3486	2.2162	1.918	1.7388	1.5492	1.3614	1.2096	1.0706	0.953	0.8171	0.7874	0.7739	0.7107	0.6768	0.6815	0.6563	0.6117	0.6017	0.5809	0.5446	0.4876	0.4665	0.4404	0.401	0.3582
649	HtMa / HtMa	young	r	C3A2	118	66.3521	91.2526	31.1133	12.6429	7.0543	4.8484	4.4362	3.6175	3.2214	3.1367	2.9682	2.6194	2.1429	1.7617	1.5441	1.3632	1.2433	1.2035	1.2476	1.2539	1.2046	1.0528	1.0044	0.9069	0.8167	0.7468	0.7013	0.6589	0.6314	0.6144	0.6551	0.6581	0.6505	0.653	0.5888	0.5354	0.4812	0.4263	0.362	0.3388	0.3093	0.2837	0.2643	0.2528
649	HtMa / HtMa	young	b	C3A2	87.3333	72.449	100.214	40.1246	19.4899	10.5232	6.6543	5.4732	4.1642	3.4241	3.1589	2.921	2.3842	1.9128	1.63	1.3435	1.1626	1.0858	1.0269	1.0333	1.0425	1.0866	1.0302	0.9387	0.842	0.7987	0.76	0.6659	0.5967	0.5944	0.6088	0.6173	0.6209	0.6161	0.5991	0.5604	0.4924	0.4493	0.4056	0.3637	0.3092	0.2989	0.2754	0.253	0.2491
650	HtMa / HtMa	young	r	C3A2	162.333	70.6267	106.728	26.2167	8.1844	4.3973	3.2812	2.9884	2.7678	2.6756	2.3714	2.1953	1.9981	1.772	1.6254	1.5166	1.4228	1.2962	1.2218	1.1893	1.1257	1.0774	1.0381	0.9429	0.8489	0.7461	0.7034	0.6512	0.5892	0.5317	0.4849	0.4468	0.395	0.3659	0.3468	0.3375	0.3014	0.2736	0.2466	0.2288	0.2137	0.2001	0.1892	0.1947	0.1944
650	HtMa / HtMa	young	b	C3A2	143.667	37.6038	43.6431	12.43	6.2782	4.0239	2.9306	2.5288	2.3423	2.2221	2.1182	1.9411	1.7356	1.605	1.4465	1.3521	1.2547	1.1699	1.1218	1.0791	1.0011	0.9484	0.9259	0.8859	0.8173	0.7621	0.6709	0.5811	0.5147	0.484	0.4321	0.3977	0.3693	0.345	0.3289	0.3216	0.3026	0.2743	0.2547	0.2447	0.2259	0.2152	0.1962	0.192	0.1924
651	HtMa /HtMi	young	r	C3A2	50.6667	44.1674	46.8169	12.6524	7.2884	5.1544	3.8352	3.3272	3.1209	2.9983	2.9365	2.9159	2.7208	2.3853	2.1749	1.9736	1.7354	1.736	1.7284	1.5863	1.5917	1.5954	1.4856	1.4043	1.4539	1.3602	1.353	1.3516	1.2681	0.9736	0.7369	0.6592	0.525	0.4574	0.376	0.3171	0.3017	0.286	0.2511	0.2271	0.1997	0.1987	0.1914	0.1705	0.1554
651	HtMa /HtMi	young	b	C3A2	100.667	33.6536	48.024	17.0011	7.6719	5.0393	3.6475	3.1333	2.8842	2.8473	2.8084	2.5167	2.2614	2.0137	1.8039	1.6782	1.5763	1.5741	1.4575	1.4182	1.4848	1.4686	1.3708	1.2371	1.0546	1.0191	0.9078	0.8564	0.7878	0.7186	0.6351	0.5632	0.4839	0.4418	0.4066	0.3628	0.3261	0.2984	0.2668	0.2411	0.2211	0.2104	0.1905	0.1693	0.1571
652	HtMa / HtMa	young	r	C3A2	99	334.439	264.296	34.4561	11.9273	7.9115	5.5561	4.7033	4.2683	3.8807	3.6468	3.4084	3.1729	3.1682	3.0613	2.7581	2.8476	2.7423	2.428	2.0989	2.0001	1.8081	1.6179	1.4302	1.4048	1.3405	1.2945	1.2734	1.2053	1.153	1.0686	1.0574	0.9979	0.919	0.8925	0.7984	0.7199	0.6223	0.5594	0.4848	0.4181	0.3763	0.3404	0.3293	0.3027
652	HtMa / HtMa	young	b	C3A2	84	36.3468	47.2829	17.4223	8.9991	6.7787	5.3412	4.2704	3.6131	3.6373	3.3529	2.9653	2.7454	2.4573	2.3658	2.2472	2.0402	1.822	1.7891	1.6878	1.5476	1.4652	1.4823	1.4104	1.2795	1.1761	1.1591	1.1501	1.1271	1.0805	1.0417	0.9996	1.0613	1.1609	1.0537	0.9246	0.8154	0.7682	0.6723	0.5569	0.5002	0.4648	0.4108	0.3607	0.3176
653	HtMa / HtMa	young	r	C3A2	64.3333	22.5485	29.8908	11.7292	7.446	6.2951	4.3947	3.4292	3.5026	3.2773	2.7262	2.4522	2.5667	2.583	2.4807	2.3982	2.0462	1.7594	1.5355	1.344	1.259	1.2155	1.1727	1.1221	1.0911	1.0915	1.1782	1.3025	1.5725	1.4329	1.3282	1.359	1.227	1.2288	1.1581	1.0586	0.9125	0.7917	0.7157	0.6157	0.5308	0.512	0.4616	0.4021	0.3684
653	HtMa / HtMa	young	b	C3A2	61	35.6448	39.489	11.4695	6.1025	4.7336	3.5874	2.8545	2.6961	2.4885	2.0716	1.8938	1.9466	1.9926	1.7805	1.3922	1.2849	1.2556	1.1717	1.0762	1.0237	0.982	0.9716	0.9653	0.9625	0.9172	0.9652	1.0437	1.0771	1.1234	1.1688	1.3469	1.4892	1.4832	1.3968	1.1772	0.9856	0.8619	0.749	0.6642	0.581	0.4483	0.3774	0.3467	0.3197
654	HtMa / HtMa	young	r	C3A2	74	83.2512	95.0255	22.2457	9.8621	6.0107	4.3418	4.2877	4.4763	4.2636	3.8188	3.4915	3.2422	2.8873	2.5005	2.2877	2.0705	1.7774	1.5805	1.5334	1.6551	1.5193	1.4998	1.3781	1.3399	1.2639	1.1471	1.013	0.8887	0.7889	0.7479	0.6946	0.636	0.5819	0.5393	0.4638	0.3852	0.3172	0.2951	0.2671	0.2355	0.224	0.1937	0.1799	0.1782
654	HtMa / HtMa	young	b	C3A2	131.667	115.096	109.355	20.633	9.7592	6.6303	5.0814	4.9151	4.8771	4.8782	4.9344	4.8327	4.5186	3.9256	3.5922	3.1694	2.7143	2.3774	2.1704	2.0596	2.0149	1.9905	1.9119	1.8215	1.8127	1.6773	1.5248	1.3779	1.2017	1.0941	1.0399	1.0118	0.9181	0.8703	0.7562	0.6359	0.5451	0.465	0.4016	0.3604	0.3281	0.2961	0.2768	0.2537	0.2307
657	HtMa / HtMa	young	r	C3A2	75	32.9371	42.7288	13.0661	7.1533	5.2191	4.2907	3.7005	3.6649	4.1113	4.1286	3.7923	3.693	3.6704	3.2947	2.8535	2.3394	2.123	1.9715	1.7449	1.507	1.3542	1.2165	1.1482	0.9893	0.9048	0.9285	0.9226	0.9122	0.8364	0.7198	0.6539	0.596	0.4902	0.394	0.3512	0.311	0.2725	0.2513	0.2432	0.2231	0.2094	0.191	0.1718	0.1575
657	HtMa / HtMa	young	b	C3A2	50.3333	62.4287	64.5585	16.6772	7.1304	4.9172	3.9081	3.2932	3.0498	3.0304	2.871	2.4845	2.3588	2.5544	2.2573	2.0338	1.8864	1.6815	1.5385	1.356	1.2521	1.1682	1.1113	1.064	0.9833	0.9617	0.986	0.9486	0.8936	0.867	0.7552	0.7177	0.6356	0.5305	0.4386	0.3871	0.3463	0.3343	0.327	0.3236	0.2758	0.2632	0.2503	0.2376	0.229
658	HtMa /HtMi	young	r	C3A2	107	91.0181	84.1818	15.1755	6.7549	4.7026	3.7715	3.7076	3.7167	3.8054	3.4336	3.0932	2.6306	2.2977	2.0661	1.7713	1.7514	1.6617	1.6305	1.5597	1.4243	1.2626	1.1616	1.0486	0.9742	0.8845	0.7933	0.7328	0.6944	0.6468	0.5891	0.5118	0.4946	0.4776	0.4371	0.4411	0.4254	0.4023	0.3602	0.3478	0.3335	0.3101	0.2803	0.2757	0.2671
658	HtMa /HtMi	young	b	C3A2	109	31.6485	44.3283	16.2328	7.6286	4.8154	3.5274	3.1447	2.9581	2.7477	2.4354	2.2356	1.9046	1.7444	1.6121	1.4428	1.394	1.3413	1.2377	1.2058	1.1686	1.0772	1.0361	0.9271	0.8626	0.7654	0.6968	0.6208	0.5576	0.499	0.4651	0.4482	0.4399	0.4308	0.4189	0.4191	0.4075	0.3894	0.3805	0.3677	0.3418	0.3076	0.2828	0.2786	0.2623
660	HtMa / HtMa	young	r	C3A2	104.333	141.255	194.235	51.2577	24.7958	17.5113	12.6531	9.4661	7.4535	6.4383	5.7983	5.2226	4.509	4.3891	3.9558	3.4631	3.2008	2.9817	2.7136	2.5349	2.3538	2.2665	2.0104	1.9097	1.7539	1.5531	1.5062	1.3985	1.2759	1.2364	1.2123	1.1816	1.1636	1.0746	1.0034	0.893	0.7553	0.6738	0.6203	0.5929	0.5644	0.5023	0.454	0.4234	0.3866
660	HtMa / HtMa	young	b	C3A2	87	324.125	370.301	74.4725	21.1252	11.8197	8.479	6.7254	5.6577	5.2131	4.7092	4.4355	3.9486	3.4045	2.8441	2.6614	2.5425	2.5063	2.3121	2.0764	1.8714	1.7897	1.6441	1.4768	1.4423	1.3651	1.2547	1.0615	1.0156	0.9491	0.8601	0.8571	0.8678	0.8037	0.7509	0.7439	0.6772	0.6353	0.6185	0.585	0.5562	0.541	0.5176	0.4991	0.4697
661	HtMa /HtMi	young	r	C3A2	108	25.2794	29.0534	9.852	7.1335	6.5589	4.9311	4.1542	4.3854	4.5867	4.2416	3.7517	3.4555	3.1293	2.7278	2.238	1.8466	1.6269	1.471	1.2559	1.1158	1.0367	0.9271	0.8286	0.7579	0.7249	0.6712	0.6227	0.5844	0.5783	0.6038	0.6141	0.6305	0.6192	0.6195	0.6335	0.5804	0.4955	0.4205	0.3582	0.2935	0.2566	0.2373	0.2307	0.2143
661	HtMa /HtMi	young	b	C3A2	108.667	21.7373	29.3511	10.8519	6.3712	4.9302	4.1211	3.7418	3.8481	4.0879	3.7723	3.4241	3.0894	2.84	2.4892	2.0223	1.6698	1.4475	1.2878	1.114	1.0516	0.9471	0.8777	0.8254	0.759	0.7058	0.6234	0.5891	0.5646	0.5564	0.5519	0.5599	0.5684	0.5978	0.6413	0.6257	0.5421	0.4602	0.3738	0.3098	0.2846	0.2477	0.2154	0.192	0.1739
662	HtMa /HtMi	young	r	C3A2	101	401.09	365.478	46.2249	27.8348	21.5851	15.475	12.1944	9.7765	8.9106	7.8426	7.4849	7.5064	6.7135	5.7064	4.9111	4.4142	3.8666	3.2565	3.0716	2.8541	2.6042	2.4156	2.2391	2.1918	2.1592	2.1142	2.2635	2.2731	2.1917	2.3489	2.2914	2.0687	1.7656	1.368	1.1011	0.9774	0.8065	0.6662	0.5897	0.5112	0.4631	0.4258	0.3579	0.3195
662	HtMa /HtMi	young	b	C3A2	106.667	43.589	65.8066	25.7652	14.6786	11.5402	8.7147	6.8444	5.9737	5.6431	5.0414	4.4162	4.3042	4.0323	3.7172	3.292	2.9757	2.8222	2.4893	2.2859	2.2337	2.0949	1.9151	1.7457	1.6396	1.4955	1.4556	1.4842	1.4253	1.4595	1.4099	1.3518	1.3024	1.1812	1.1089	0.9989	0.8557	0.7992	0.7289	0.6077	0.5201	0.4488	0.4122	0.351	0.3143
664	HtMa / HtMa	young	r	C3A2	136	97.5652	89.0746	17.69	9.8014	8.7882	7.2274	5.3689	4.9295	5.0352	4.9082	4.4176	4.1337	3.8687	3.6713	3.8617	3.9442	3.7596	3.4933	3.0837	2.694	2.4198	2.1783	2.0773	1.8444	1.7725	1.7076	1.7037	1.6388	1.5686	1.4374	1.4188	1.2207	1.0814	0.9345	0.7993	0.7352	0.6734	0.6175	0.5512	0.5136	0.467	0.4217	0.3921	0.364
664	HtMa / HtMa	young	b	C3A2	153	114.843	107.184	23.6901	12.2235	8.804	6.0966	5.2525	5.0686	4.4832	3.9732	3.8365	3.5692	3.2362	2.8749	2.7142	2.6045	2.6131	2.6904	2.4958	2.2933	2.1303	2.0137	1.9179	1.7962	1.7424	1.7087	1.6336	1.542	1.5181	1.3947	1.2936	1.2327	1.1727	1.032	0.9194	0.866	0.7743	0.6446	0.6138	0.5526	0.4736	0.4067	0.3698	0.3398
666	HtMa / HtMa	young	r	C3A2	110.667	66.8137	94.8759	24.5043	14.6122	11.6119	8.5329	7.2408	6.3063	5.171	4.3844	4.1908	3.9828	3.6214	3.1333	2.8463	2.765	2.4641	2.2807	2.0141	1.8157	1.7404	1.574	1.3923	1.3108	1.2769	1.3095	1.2555	1.0784	1.0507	1.0269	1.0307	1.056	1.0308	1.0486	1.0355	1.012	1.0723	1.0815	1.0579	1.0587	0.9299	0.8965	0.8025	0.6895
666	HtMa / HtMa	young	b	C3A2	154.333	117.669	114.816	22.4691	11.6987	9.0385	6.3969	5.474	4.9641	4.3124	3.9418	3.5388	3.2968	2.9431	2.762	2.4043	2.2198	2.0452	1.9034	1.8452	1.682	1.5864	1.4552	1.3759	1.301	1.2308	1.1504	1.0747	1.0328	0.9845	0.9986	1.0316	1.0754	1.1188	1.2244	1.3159	1.3387	1.3877	1.3941	1.3391	1.2537	1.2387	1.1316	0.9816	0.8784
667	HtMa / HtMa	young	r	C3A2	152.667	25.7248	35.9411	17.0928	11.7841	9.1823	7.209	6.434	6.4374	6.0049	5.9565	6.4692	6.4594	5.556	4.8457	4.4049	3.7572	3.3713	3.2439	3.0528	2.8337	2.8336	2.7887	2.8024	2.7686	2.6159	2.4866	2.3312	2.2059	2.0281	1.9504	1.9541	1.8438	1.617	1.4135	1.2789	1.1865	1.0587	0.9284	0.7959	0.7281	0.643	0.5453	0.4914	0.4749
667	HtMa / HtMa	young	b	C3A2	93.3333	40.3134	45.7009	18.7761	12.3306	9.3108	7.2761	6.5225	6.2668	6.0511	5.7726	5.5821	5.1035	4.4443	4.1578	3.8986	3.2406	2.9226	3.0255	2.8613	2.8253	2.6766	2.7696	2.7771	2.6545	2.5948	2.393	2.2628	2.0532	1.994	1.939	1.7783	1.6134	1.4802	1.4464	1.3856	1.2339	1.0904	0.9372	0.8525	0.744	0.6339	0.562	0.5034	0.4352
668	HtMa / HtMa	young	r	C3A2	130	28.8244	38.6774	16.2506	10.8481	7.9106	5.8865	4.7934	4.4286	4.3915	4.2324	3.9459	3.4124	2.8204	2.4462	2.1369	1.8363	1.6833	1.4955	1.2964	1.1783	1.0667	0.9857	0.8974	0.8058	0.7514	0.6613	0.5623	0.5054	0.4998	0.4521	0.4087	0.3856	0.366	0.3477	0.3268	0.3036	0.2785	0.2602	0.2274	0.2053	0.1989	0.177	0.1714	0.1678
668	HtMa / HtMa	young	b	C3A2	119	29.0395	40.3614	16.2557	9.141	6.6489	4.7895	4.0431	3.8336	3.724	3.7949	3.7397	3.2618	2.7068	2.3959	2.0182	1.8319	1.6994	1.5487	1.3904	1.2788	1.1986	1.0641	0.9305	0.8406	0.8007	0.7185	0.6241	0.5436	0.498	0.4871	0.4608	0.4426	0.408	0.3999	0.3999	0.3776	0.3326	0.305	0.2712	0.2361	0.2212	0.2026	0.1947	0.1784
669	HtMi / HtMi	young	r	C3A2	98.6667	33.0064	47.5489	20.6068	11.9026	8.2024	5.8881	4.2975	3.3957	3.1151	3.1573	2.9022	2.5393	2.1731	1.9364	1.759	1.5658	1.3778	1.2854	1.2444	1.1643	1.0776	0.9762	0.8091	0.6966	0.6118	0.5402	0.478	0.4534	0.4287	0.4078	0.3816	0.3664	0.3395	0.3238	0.3452	0.3396	0.3035	0.2913	0.2673	0.2429	0.242	0.2224	0.2023	0.2014
669	HtMi / HtMi	young	b	C3A2	125.667	43.6493	62.9336	23.3346	10.98	7.1643	5.1864	3.6876	2.975	2.8242	2.9732	2.6608	2.2303	1.9351	1.7337	1.6781	1.4896	1.3506	1.2378	1.244	1.1711	1.0473	0.9199	0.7697	0.7064	0.6192	0.5657	0.5058	0.4754	0.4403	0.411	0.4124	0.4245	0.4155	0.3779	0.3579	0.3481	0.3129	0.2901	0.2749	0.2594	0.2377	0.2202	0.1991	0.1764
670	HtMa / HtMa	young	r	C3A2	99.6667	98.4217	107.536	23.7923	15.355	12.4636	9.2611	7.0124	6.4174	5.8093	5.1631	4.6485	3.9318	3.2535	2.7867	2.4727	2.2565	2.2329	2.1822	2.0609	1.9288	1.6826	1.6096	1.5255	1.3426	1.231	1.1528	1.0514	1.0045	1.064	1.0842	1.0566	1.0859	0.9948	0.8936	0.8227	0.7202	0.6413	0.5684	0.5361	0.4845	0.4492	0.409	0.3774	0.3678
670	HtMa / HtMa	young	b	C3A2	169.333	43.2238	45.6401	15.4359	9.6337	8.1475	6.6423	5.6254	5.2519	4.7003	4.126	3.5526	3.1703	2.7989	2.4602	2.2447	2.0481	1.9609	1.8751	1.8566	1.8636	1.724	1.6106	1.4893	1.3596	1.2511	1.1893	1.0822	1.0156	0.9935	0.9724	0.9608	0.9103	0.8826	0.8376	0.7613	0.6969	0.6461	0.6085	0.551	0.5105	0.4784	0.4288	0.3899	0.3679
673	HtMa / HtMa	young	r	C3A2	115.667	145.079	128.312	18.6658	7.9273	5.8661	4.5501	4.4633	5.1105	6.0383	6.0675	5.1525	4.0321	3.1806	2.6358	2.4948	2.4349	2.3516	2.2341	2.0416	1.9001	1.7053	1.4312	1.2991	1.1901	1.0332	0.8803	0.7993	0.7025	0.6538	0.5604	0.5015	0.4631	0.4361	0.4079	0.356	0.3224	0.2959	0.2575	0.2358	0.2106	0.2	0.1836	0.161	0.1577
673	HtMa / HtMa	young	b	C3A2	96.3333	196.615	160.474	26.1691	13.0635	8.3227	6.407	5.5749	5.6213	5.2361	5.3103	4.8877	3.7054	2.641	2.1415	1.8716	1.8135	1.7518	1.7978	1.8609	1.7567	1.7876	1.6654	1.3922	1.1367	0.9317	0.8642	0.7948	0.7215	0.6186	0.5637	0.552	0.5431	0.5074	0.4299	0.3873	0.3494	0.3089	0.2823	0.239	0.2145	0.1916	0.1729	0.1661	0.1513
674	HtMa /HtMi	young	r	C3A2	105	83.913	85.9319	21.5328	11.8621	8.2017	6.0409	4.9363	4.4409	4.1377	3.75	3.3839	3.0506	2.6406	2.1631	1.7706	1.5816	1.5006	1.3325	1.1675	1.0493	0.9669	0.8958	0.8239	0.828	0.7657	0.7008	0.6953	0.6515	0.6143	0.5666	0.4931	0.4343	0.3905	0.3618	0.3382	0.3127	0.2925	0.2794	0.2606	0.2479	0.2355	0.218	0.2056	0.1954
674	HtMa /HtMi	young	b	C3A2	101.667	44.2409	59.2055	19.5887	10.8705	7.5531	5.4787	4.6176	4.3593	4.2361	3.4744	3.1311	2.9412	2.3028	1.9414	1.798	1.589	1.382	1.2001	1.1243	1.0847	1.0368	0.9672	0.8933	0.8465	0.7709	0.7685	0.6936	0.6399	0.6116	0.5664	0.5109	0.4494	0.4369	0.4172	0.4061	0.3998	0.3787	0.341	0.3231	0.295	0.2796	0.2581	0.25	0.2269
[truncated: 37 more columns]
